# Supplementary material for: Comprehensive Air Quality Assessment of the Tobacco Heating System 2.2 under Simulated Indoor Environments
Source: MDPI journal article supplement (doi:10.3390/atmos12080989), 2021-07-31

## Supplementary Material: Statistical Modeling

|      |                                                                                                                                                 |    |
|------|-------------------------------------------------------------------------------------------------------------------------------------------------|----|
| 1.   | Statistical model for airborne nicotine.....                                                                                                    | 3  |
| 1.1. | Data for airborne nicotine at simulated Residential category III environmental condition (0.5 h <sup>-1</sup> )<br>3                            |    |
| 2.   | Statistical model for airborne acetaldehyde.....                                                                                                | 4  |
| 2.1. | Data for airborne acetaldehyde at simulated Residential category III environmental condition<br>(0.5 h <sup>-1</sup> )4                         |    |
| 2.2. | Data for airborne acetaldehyde at simulated Store environmental condition (2.4 h <sup>-1</sup> ) .....                                          | 5  |
| 2.3. | Data for airborne acetaldehyde at simulated Restaurant environmental conditions (4.3 h <sup>-1</sup> ).....                                     | 6  |
| 3.   | Statistical model for TVOC .....                                                                                                                | 7  |
| 3.1. | Data for TVOC at simulated Residential category III environmental condition (0.5 h <sup>-1</sup> ) .....                                        | 7  |
| 3.2. | Data for TVOC at simulated Store environmental condition (2.4 h <sup>-1</sup> ) .....                                                           | 8  |
| 3.3. | Data for TVOC at simulated Restaurant environmental condition (4.3 h <sup>-1</sup> ) .....                                                      | 9  |
| 4.   | Statistical model for TVOC with subtraction of flavor compounds.....                                                                            | 10 |
| 4.1. | Data for TVOC with subtraction of flavor compounds at simulated Residential category III<br>environmental condition (0.5 h <sup>-1</sup> )..... | 10 |
| 4.2. | Data for TVOC with subtraction of flavor compounds at simulated Store environmental<br>condition (2.4 h <sup>-1</sup> ) .....                   | 11 |
| 4.3. | Data for TVOC with subtraction of flavor compounds at simulated Restaurant environmental<br>condition (4.3 h <sup>-1</sup> ) .....              | 12 |
| 5.   | Statistical model for airborne formaldehyde .....                                                                                               | 12 |
| 5.1. | Data for airborne formaldehyde at simulated Residential category III environmental condition<br>(0.5 h <sup>-1</sup> )12                        |    |
| 5.2. | Data for airborne formaldehyde at simulated Store environmental condition (2.4 h <sup>-1</sup> ).....                                           | 13 |
| 5.3. | Data for airborne formaldehyde at simulated Restaurant environmental condition (4.3 h <sup>-1</sup> ).....                                      | 14 |
| 6.   | Statistical model for airborne benzene .....                                                                                                    | 15 |
| 6.1. | Data for airborne benzene at simulated Residential category III environmental condition (0.5 h <sup>-1</sup> )<br>15                            |    |
| 6.2. | Data for airborne benzene at simulated Store environmental condition (2.4 h <sup>-1</sup> ) .....                                               | 16 |
| 6.3. | Data for airborne benzene at simulated Restaurant environmental condition (4.3 h <sup>-1</sup> ) .....                                          | 17 |
| 7.   | Statistical model for airborne isoprene.....                                                                                                    | 18 |
| 7.1. | Data for airborne isoprene at simulated Residential category III environmental condition (0.5 h <sup>-1</sup> )<br>18                           |    |
| 7.2. | Data for airborne isoprene at simulated Store environmental condition (2.4 h <sup>-1</sup> ).....                                               | 19 |

|      |                                                                                                                        |    |
|------|------------------------------------------------------------------------------------------------------------------------|----|
| 7.3. | Data for airborne isoprene at simulated Restaurant environmental condition ( $4.3 \text{ h}^{-1}$ ) .....              | 20 |
| 8.   | Statistical model for airborne toluene.....                                                                            | 21 |
| 8.1. | Data for airborne toluene at simulated Residential category III environmental condition ( $0.5 \text{ h}^{-1}$ )<br>22 |    |
| 8.2. | Data for airborne toluene at simulated Store environmental condition ( $2.4 \text{ h}^{-1}$ ) .....                    | 23 |
| 8.3. | Data for airborne toluene at simulated Restaurant environmental condition ( $4.3 \text{ h}^{-1}$ ) .....               | 23 |

#### Abbreviations:

BKG: Background

CI: Confidence interval

DF: degrees of freedom

Estimate: means, difference of means (= contrasts) estimates depending on cases

LCI: Lower limit of confidence interval

P1: Tobacco heating System

$\text{Pr} > F$ : p-value Fisher

$\text{Pr} > |t|$ : p-value student

REML: Restricted Maximum Likelihood

SE: Standard error

UCI – Upper limit of confidence interval

## 1. Statistical model for airborne nicotine

| Model Information         |                     |
|---------------------------|---------------------|
| Data Set                  | WORK.COMPREH_IQOS   |
| Dependent Variable        | Reported_Conc       |
| Covariance Structure      | Variance Components |
| Group Effects             | Condition, Conditio |
| Estimation Method         | REML                |
| Residual Variance Method  | None                |
| Fixed Effects SE Method   | Model-Based         |
| Degrees of Freedom Method | Satterthwaite       |

### 1.1. Data for airborne nicotine at simulated Residential category III environmental condition ( $0.5\text{ h}^{-1}$ )

| Covariance Parameter Estimates |            |          |
|--------------------------------|------------|----------|
| Cov Parm                       | Group      | Estimate |
| Day                            | Background | 0.0057   |
| Day                            | THS        | 0.1566   |
| Residual                       | Background | 0.0002   |
| Residual                       | THS        | 0.0125   |

day to day variance  
day to day variance  
Replicate to replicate variance  
Replicate to replicate variance

| Type 3 Tests of Fixed Effects |        |        |         |        |
|-------------------------------|--------|--------|---------|--------|
| Effect                        | Num DF | Den DF | F Value | Pr > F |
| Condition                     | 1      | 3.22   | 14.49   | 0.0282 |

Significant effect of condition factor

| Estimates      |          |        |    |         |         |       |        |        | Relative effect |     |      |
|----------------|----------|--------|----|---------|---------|-------|--------|--------|-----------------|-----|------|
| Label          | Estimate | SE     | DF | t Value | Pr >  t | Alpha | LCI    | UCI    | Estimate        | LCI | UCI  |
| Mean BKG       | 0.3171   | 0.0380 | 3  | 8.35    | 0.0036  | 0.05  | 0.1962 | 0.4380 |                 |     |      |
| Mean THS       | 1.0913   | 0.1998 | 3  | 5.46    | 0.0121  | 0.05  | 0.4554 | 1.7271 |                 |     |      |
| Mean THS - BKG | 0.7742   | 0.2034 | 3  | 3.81    | 0.0282  | 0.1   | 0.3084 | 1.2400 | 244%            | 97% | 391% |
| Mean THS - BKG | 0.7742   | 0.2034 | 3  | 3.81    | 0.0282  | 0.05  | 0.1509 | 1.3975 | 244%            | 48% | 441% |

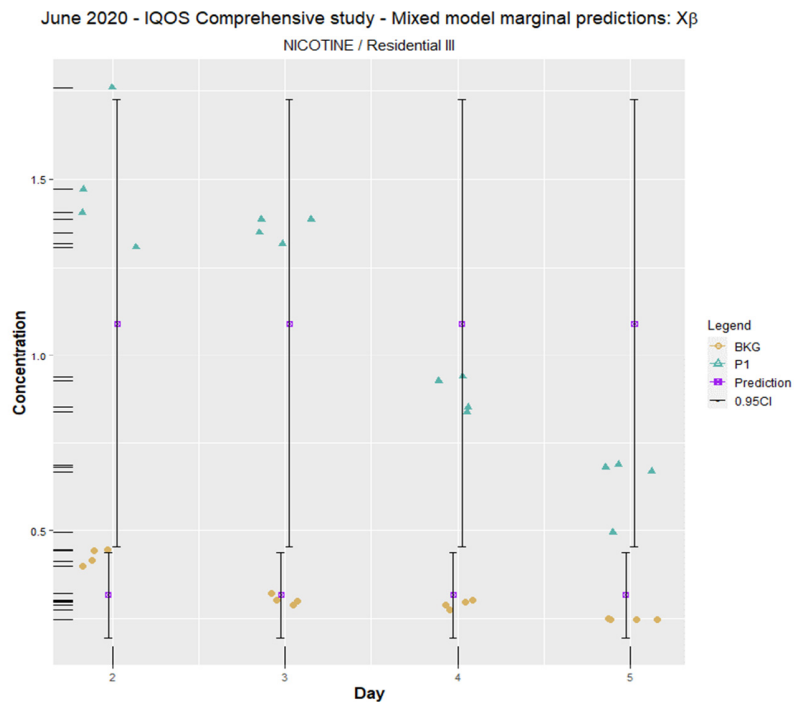

## 2. Statistical model for airborne acetaldehyde

| Model Information         |                     |
|---------------------------|---------------------|
| Data Set                  | WORK.COMPREH_IQOS   |
| Dependent Variable        | Reported_Conc       |
| Covariance Structure      | Variance Components |
| Group Effect              | Condition           |
| Estimation Method         | REML                |
| Residual Variance Method  | None                |
| Fixed Effects SE Method   | Model-Based         |
| Degrees of Freedom Method | Satterthwaite       |

### 2.1. Data for airborne acetaldehyde at simulated Residential category III environmental condition ( $0.5\ h^{-1}$ )

| Covariance Parameter Estimates |            |          |
|--------------------------------|------------|----------|
| Cov Parm                       | Group      | Estimate |
| Day                            |            | 0.0224   |
| Residual                       | Background | 0.0020   |
| Residual                       | THS        | 0.0459   |

| Type 3 Tests of Fixed Effects |        |        |         |        |
|-------------------------------|--------|--------|---------|--------|
| Effect                        | Num DF | Den DF | F Value | Pr > F |
| Condition                     | 1      | 15.8   | 4539.4  | <.0001 |

Significant effect of condition factor

| Estimates      |          |        |    |         |         |       |        |        | Relative effect |      |      |
|----------------|----------|--------|----|---------|---------|-------|--------|--------|-----------------|------|------|
| Label          | Estimate | SE     | DF | t Value | Pr >  t | Alpha | LCI    | UCI    | Estimate        | LCI  | UCI  |
| Mean BKG       | 2.1857   | 0.0757 | 3  | 28.9    | <.0001  | 0.05  | 1.9449 | 2.4264 |                 |      |      |
| Mean THS       | 5.8723   | 0.0921 | 6  | 63.8    | <.0001  | 0.05  | 5.6494 | 6.0952 |                 |      |      |
| Mean THS - BKG | 3.6866   | 0.0547 | 16 | 67.4    | <.0001  | 0.1   | 3.5910 | 3.7823 | 169%            | 164% | 173% |
| Mean THS - BKG | 3.6866   | 0.0547 | 16 | 67.4    | <.0001  | 0.05  | 3.5705 | 3.8028 | 169%            | 163% | 174% |

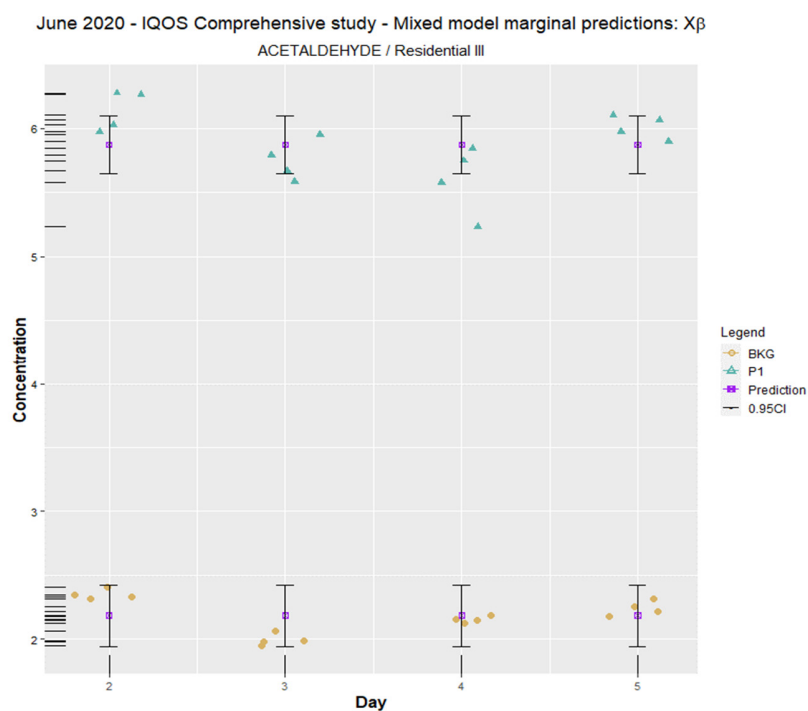

## 2.2. Data for airborne acetaldehyde at simulated Store environmental condition ( $2.4\text{ h}^{-1}$ )

| Covariance Parameter Estimates |          |     |  |
|--------------------------------|----------|-----|--|
| Cov Parm                       | Estimate |     |  |
| Day                            | 0.7591   | 95% |  |
| Condition*Day                  | 0.0249   | 3%  |  |
| Residual                       | 0.0174   | 2%  |  |

| Type 3 Tests of Fixed Effects |        |        |         |        |
|-------------------------------|--------|--------|---------|--------|
| Effect                        | Num DF | Den DF | F Value | Pr > F |
| Condition                     | 1      | 3      | 115.9   | 0.0017 |

Significant effect of condition factor

| Estimates      |          |        |    |         |         |       |        |        | Relative effect |     |     |
|----------------|----------|--------|----|---------|---------|-------|--------|--------|-----------------|-----|-----|
| Label          | Estimate | SE     | DF | t Value | Pr >  t | Alpha | LCI    | UCI    | Estimate        | LCI | UCI |
| Mean BKG       | 2.7158   | 0.4440 | 3  | 6.12    | 0.0088  | 0.05  | 1.3030 | 4.1287 |                 |     |     |
| Mean THS       | 4.0175   | 0.4440 | 3  | 9.05    | 0.0029  | 0.05  | 2.6046 | 5.4304 |                 |     |     |
| Mean THS - BKG | 1.3017   | 0.1209 | 3  | 10.8    | 0.0017  | 0.1   | 1.0171 | 1.5862 | 48%             | 37% | 58% |
| Mean THS - BKG | 1.3017   | 0.1209 | 3  | 10.8    | 0.0017  | 0.05  | 0.9168 | 1.6865 | 48%             | 34% | 62% |

### 2.3. Data for airborne acetaldehyde at simulated Restaurant environmental conditions (4.3 h<sup>-1</sup>)

| Covariance Parameter Estimates |          |     |                                 |
|--------------------------------|----------|-----|---------------------------------|
| Cov Parm                       | Estimate |     |                                 |
| Day                            | 0.0210   | 69% | day to day variance             |
| Condition*Day                  | 0.0053   | 17% |                                 |
| Residual                       | 0.0043   | 14% | Replicate to replicate variance |

| Type 3 Tests of Fixed Effects |        |        |         |        |
|-------------------------------|--------|--------|---------|--------|
| Effect                        | Num DF | Den DF | F Value | Pr > F |
| Condition                     | 1      | 2      | 237.3   | 0.0042 |

Significant effect of condition factor

| Estimates      |          |        |    |         |         |       |        |        | Relative effect |     |      |
|----------------|----------|--------|----|---------|---------|-------|--------|--------|-----------------|-----|------|
| Label          | Estimate | SE     | DF | t Value | Pr >  t | Alpha | LCI    | UCI    | Estimate        | LCI | UCI  |
| Mean BKG       | 1.1010   | 0.0954 | 2  | 11.6    | 0.0074  | 0.05  | 0.6908 | 1.5113 |                 |     |      |
| Mean THS       | 2.1015   | 0.0954 | 2  | 22.0    | 0.0021  | 0.05  | 1.6913 | 2.5118 |                 |     |      |
| Mean THS - BKG | 1.0005   | 0.0650 | 2  | 15.4    | 0.0042  | 0.1   | 0.8108 | 1.1901 | 91%             | 74% | 108% |
| Mean THS - BKG | 1.0005   | 0.0650 | 2  | 15.4    | 0.0042  | 0.05  | 0.7210 | 1.2799 | 91%             | 65% | 116% |

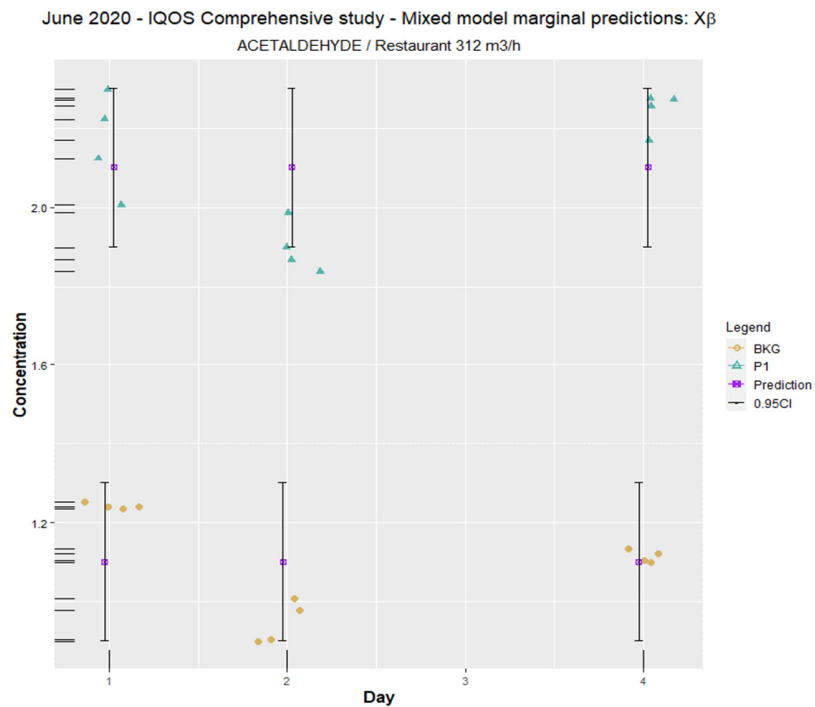

### 3. Statistical model for TVOC

| Model Information         |                     |
|---------------------------|---------------------|
| Data Set                  | WORK.COMPREH_IQOS   |
| Dependent Variable        | Reported_Conc       |
| Covariance Structure      | Variance Components |
| Estimation Method         | REML                |
| Residual Variance Method  | Profile             |
| Fixed Effects SE Method   | Model-Based         |
| Degrees of Freedom Method | Containment         |

#### 3.1. Data for TVOC at simulated Residential category III environmental condition ( $0.5\text{ h}^{-1}$ )

| Covariance Parameter Estimates |          |     |                                 |
|--------------------------------|----------|-----|---------------------------------|
| Cov Parm                       | Estimate |     |                                 |
| Day                            | 353.1    | 89% | day to day variance             |
| Condition*Day                  | 41.65    | 11% |                                 |
| Residual                       | 1.7223   | 0%  | Replicate to replicate variance |

| Type 3 Tests of Fixed Effects |        |        |         |        |
|-------------------------------|--------|--------|---------|--------|
| Effect                        | Num DF | Den DF | F Value | Pr > F |
| Condition                     | 1      | 3      | 24.06   | 0.0162 |

Significant effect of condition factor

| Estimates      |          |        |    |         |         |       |         |         | Relative effect |     |      |
|----------------|----------|--------|----|---------|---------|-------|---------|---------|-----------------|-----|------|
| Label          | Estimate | SE     | DF | t Value | Pr >  t | Alpha | LCI     | UCI     | Estimate        | LCI | UCI  |
| Mean BKG       | 35.2785  | 9.9394 | 3  | 3.55    | 0.0381  | 0.05  | 3.6467  | 66.9102 |                 |     |      |
| Mean THS       | 57.7792  | 9.9394 | 3  | 5.81    | 0.0101  | 0.05  | 26.1474 | 89.411  |                 |     |      |
| Mean THS - BKG | 22.5008  | 4.5872 | 3  | 4.91    | 0.0162  | 0.1   | 11.7054 | 33.2961 | 64%             | 33% | 94%  |
| Mean THS - BKG | 22.5008  | 4.5872 | 3  | 4.91    | 0.0162  | 0.05  | 7.9022  | 37.0993 | 64%             | 22% | 105% |

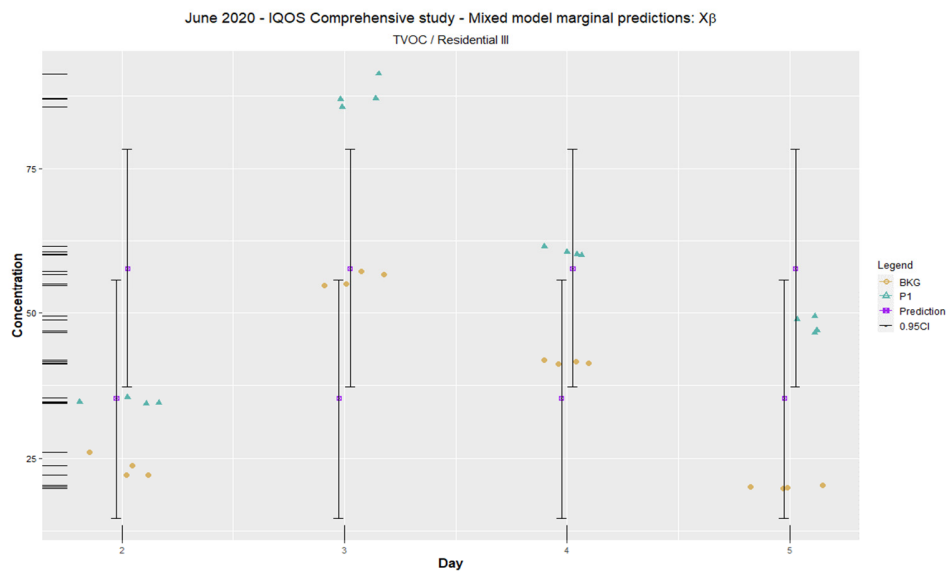

### 3.2. Data for TVOC at simulated Store environmental condition ( $2.4\ h^{-1}$ )

| Covariance Parameter Estimates |          |     |
|--------------------------------|----------|-----|
| Cov Parm                       | Estimate |     |
| Day                            | 1.1688   | 16% |
| Condition*Day                  | 5.5294   | 76% |
| Residual                       | 0.5939   | 8%  |

| Type 3 Tests of Fixed Effects |        |        |         |        |
|-------------------------------|--------|--------|---------|--------|
| Effect                        | Num DF | Den DF | F Value | Pr > F |
| Condition                     | 1      | 3      | 28.28   | 0.0130 |

Significant effect of condition factor

| Estimates      |          |        |    |         |         |       |         |         | Relative effect |      |      |
|----------------|----------|--------|----|---------|---------|-------|---------|---------|-----------------|------|------|
| Label          | Estimate | SE     | DF | t Value | Pr >  t | Alpha | LCI     | UCI     | Estimate        | LCI  | UCI  |
| Mean BKG       | 4.9257   | 1.3083 | 6  | 3.76    | 0.0099  | 0.05  | 1.7016  | 8.1498  |                 |      |      |
| Mean THS       | 13.8866  | 1.3083 | 6  | 10.61   | <.0001  | 0.05  | 10.6625 | 17.1107 |                 |      |      |
| Mean THS - BKG | 8.9609   | 1.6849 | 3  | 5.32    | 0.0130  | 0.1   | 4.9957  | 12.9261 | 182%            | 101% | 262% |

| Estimates      |          |        |    |         |         |       |        |         | Relative effect |     |      |
|----------------|----------|--------|----|---------|---------|-------|--------|---------|-----------------|-----|------|
| Label          | Estimate | SE     | DF | t Value | Pr >  t | Alpha | LCI    | UCI     | Estimate        | LCI | UCI  |
| Mean THS - BKG | 8.9609   | 1.6849 | 3  | 5.32    | 0.0130  | 0.05  | 3.5988 | 14.3231 | 182%            | 73% | 291% |

### 3.3. Data for TVOC at simulated Restaurant environmental condition (4.3 h<sup>-1</sup>)

| Covariance Parameter Estimates |          |                                    |
|--------------------------------|----------|------------------------------------|
| Cov Parm                       | Estimate |                                    |
| Day                            | 6.1526   | 59% day to day variance            |
| Condition*Day                  | 4.0196   | 39%                                |
| Residual                       | 0.2367   | 2% Replicate to replicate variance |

| Type 3 Tests of Fixed Effects |        |        |         |        |
|-------------------------------|--------|--------|---------|--------|
| Effect                        | Num DF | Den DF | F Value | Pr > F |
| Condition                     | 1      | 3      | 8.29    | 0.0636 |

Not Significant effect of condition factor

| Estimates      |          |        |    |         |         |       |         |         | Relative effect |      |      |
|----------------|----------|--------|----|---------|---------|-------|---------|---------|-----------------|------|------|
| Label          | Estimate | SE     | DF | t Value | Pr >  t | Alpha | LCI     | UCI     | Estimate        | LCI  | UCI  |
| Mean BKG       | 3.1218   | 1.5993 | 3  | 1.95    | 0.1460  | 0.05  | -1.968  | 8.2115  |                 |      |      |
| Mean THS       | 7.2326   | 1.5993 | 3  | 4.52    | 0.0202  | 0.05  | 2.1429  | 12.3224 |                 |      |      |
| Mean THS - BKG | 4.1109   | 1.4281 | 3  | 2.88    | 0.0636  | 0.1   | 0.7501  | 7.4716  | 132%            | 24%  | 239% |
| Mean THS - BKG | 4.1109   | 1.4281 | 3  | 2.88    | 0.0636  | 0.05  | -0.4338 | 8.6556  | 132%            | -14% | 277% |

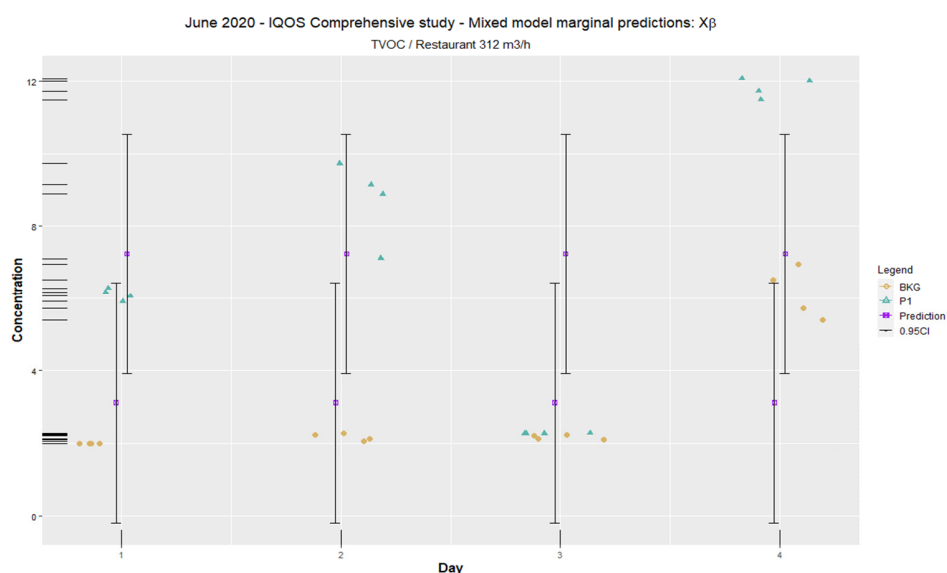

#### 4. Statistical model for TVOC with subtraction of flavor compounds

| Model Information         |                     |
|---------------------------|---------------------|
| Data Set                  | WORK.COMPREH_TVOC   |
| Dependent Variable        | Reported_Conc       |
| Covariance Structure      | Variance Components |
| Estimation Method         | REML                |
| Residual Variance Method  | Profile             |
| Fixed Effects SE Method   | Model-Based         |
| Degrees of Freedom Method | Containment         |

4.1. Data for TVOC with subtraction of flavor compounds at simulated Residential category III environmental condition ( $0.5\text{ h}^{-1}$ )

| Covariance Parameter Estimates |          |     |                                 |
|--------------------------------|----------|-----|---------------------------------|
| Cov Parm                       | Estimate |     |                                 |
| Day                            | 238.3    | 88% | day to day variance             |
| Condition*Day                  | 29.19    | 11% |                                 |
| Residual                       | 1.9789   | 1%  | Replicate to replicate variance |

| Type 3 Tests of Fixed Effects |        |        |         |        |
|-------------------------------|--------|--------|---------|--------|
| Effect                        | Num DF | Den DF | F Value | Pr > F |
| Condition                     | 1      | 3      | 6.54    | 0.0834 |

Significant effect of condition factor

| Estimates      |          |        |    |         |         |       |         |         | Relative effect |     |     |
|----------------|----------|--------|----|---------|---------|-------|---------|---------|-----------------|-----|-----|
| Label          | Estimate | SE     | DF | t Value | Pr >  t | Alpha | LCI     | UCI     | Estimate        | LCI | UCI |
| Mean BKG       | 30.7008  | 8.1851 | 3  | 3.75    | 0.0331  | 0.05  | 4.6522  | 56.7494 |                 |     |     |
| Mean THS       | 40.5511  | 8.1851 | 3  | 4.95    | 0.0158  | 0.05  | 14.5026 | 66.5997 |                 |     |     |
| Mean THS - BKG | 9.8503   | 3.8526 | 3  | 2.56    | 0.0834  | 0.1   | 0.7838  | 18.9169 | 32%             | 3%  | 62% |
| Mean THS - BKG | 9.8503   | 3.8526 | 3  | 2.56    | 0.0834  | 0.05  | -2.4103 | 22.111  | 32%             | -8% | 72% |

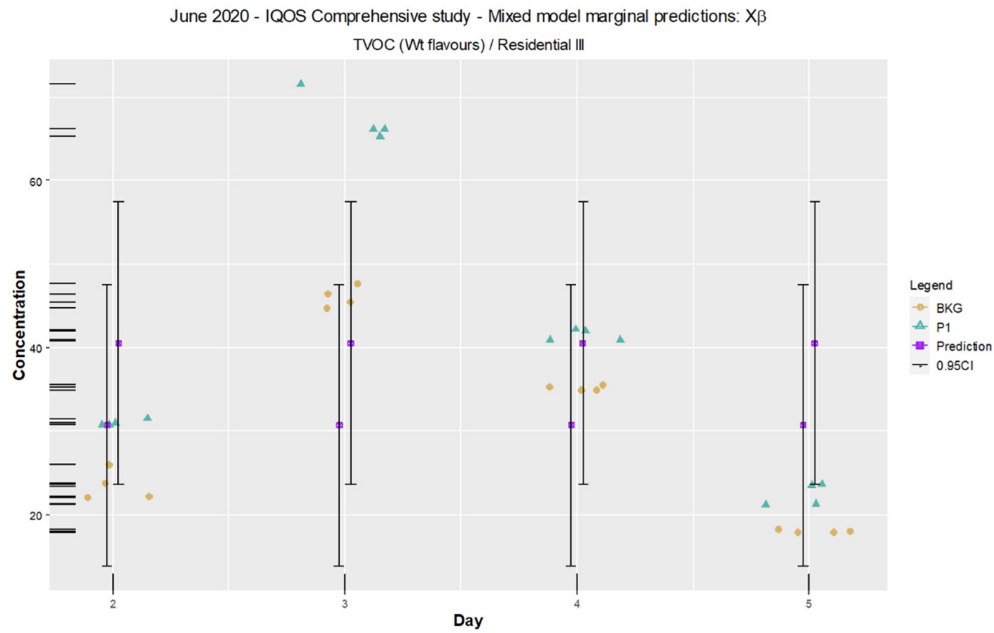

#### 4.2. Data for TVOC with subtraction of flavor compounds at simulated Store environmental condition ( $2.4\text{ h}^{-1}$ )

| Covariance Parameter Estimates |          |     |
|--------------------------------|----------|-----|
| Cov Parm                       | Estimate |     |
| Day                            | 0        | 0%  |
| Condition*Day                  | 11.8687  | 95% |
| Residual                       | 0.5952   | 5%  |

| Type 3 Tests of Fixed Effects |        |        |         |        |
|-------------------------------|--------|--------|---------|--------|
| Effect                        | Num DF | Den DF | F Value | Pr > F |
| Condition                     | 1      | 6      | 10.09   | 0.0192 |

Significant effect of condition factor

| Estimates      |          |        |    |         |         |       |        |         | Relative effect |     |      |
|----------------|----------|--------|----|---------|---------|-------|--------|---------|-----------------|-----|------|
| Label          | Estimate | SE     | DF | t Value | Pr >  t | Alpha | LCI    | UCI     | Estimate        | LCI | UCI  |
| Mean BKG       | 4.9257   | 1.7333 | 6  | 2.84    | 0.0295  | 0.05  | 0.6844 | 9.1670  |                 |     |      |
| Mean THS       | 12.7121  | 1.7333 | 6  | 7.33    | 0.0003  | 0.05  | 8.4708 | 16.9534 |                 |     |      |
| Mean THS - BKG | 7.7864   | 2.4513 | 6  | 3.18    | 0.0192  | 0.1   | 3.0232 | 12.5497 | 158%            | 61% | 255% |
| Mean THS - BKG | 7.7864   | 2.4513 | 6  | 3.18    | 0.0192  | 0.05  | 1.7884 | 13.7845 | 158%            | 36% | 280% |

4.3. Data for TVOC with subtraction of flavor compounds at simulated Restaurant environmental condition (4.3 h<sup>-1</sup>)

| Covariance Parameter Estimates |          |     |                                 |  |
|--------------------------------|----------|-----|---------------------------------|--|
| Cov Parm                       | Estimate |     |                                 |  |
| Day                            | 3.5139   | 66% | day to day variance             |  |
| Condition*Day                  | 1.5435   | 29% |                                 |  |
| Residual                       | 0.2515   | 5%  | Replicate to replicate variance |  |

| Type 3 Tests of Fixed Effects |        |        |         |        |
|-------------------------------|--------|--------|---------|--------|
| Effect                        | Num DF | Den DF | F Value | Pr > F |
| Condition                     | 1      | 3      | 1.8     | 0.2717 |

Not Significant effect of condition factor

| Estimates      |          |        |    |         |         |       |         |        | Relative effect |      |      |
|----------------|----------|--------|----|---------|---------|-------|---------|--------|-----------------|------|------|
| Label          | Estimate | SE     | DF | t Value | Pr >  t | Alpha | LCI     | UCI    | Estimate        | LCI  | UCI  |
| Mean BKG       | 3.1218   | 1.1314 | 4  | 2.76    | 0.0498  | 0.05  | 0.0043  | 6.2392 |                 |      |      |
| Mean THS       | 4.3257   | 1.1314 | 4  | 3.82    | 0.0181  | 0.05  | 1.2082  | 7.4431 |                 |      |      |
| Mean THS - BKG | 1.2039   | 0.8962 | 3  | 1.34    | 0.2717  | 0.1   | -0.9052 | 3.313  | 39%             | -29% | 106% |
| Mean THS - BKG | 1.2039   | 0.8962 | 3  | 1.34    | 0.2717  | 0.05  | -1.6482 | 4.0561 | 39%             | -53% | 130% |

5. Statistical model for airborne formaldehyde

| Model Information         |                     |
|---------------------------|---------------------|
| Data Set                  | WORK.COMPRESH_IQOS  |
| Dependent Variable        | Reported_Conc       |
| Covariance Structure      | Variance Components |
| Estimation Method         | REML                |
| Residual Variance Method  | Profile             |
| Fixed Effects SE Method   | Model-Based         |
| Degrees of Freedom Method | Satterthwaite       |

5.1. Data for airborne formaldehyde at simulated Residential category III environmental condition (0.5 h<sup>-1</sup>)

| Covariance Parameter Estimates |          |     |                                 |  |
|--------------------------------|----------|-----|---------------------------------|--|
| Cov Parm                       | Estimate |     |                                 |  |
| Day                            | 1.6131   | 87% | day to day variance             |  |
| Condition*Day                  | 0.0698   | 4%  |                                 |  |
| Residual                       | 0.1715   | 9%  | Replicate to replicate variance |  |

| Type 3 Tests of Fixed Effects |        |        |         |        |
|-------------------------------|--------|--------|---------|--------|
| Effect                        | Num DF | Den DF | F Value | Pr > F |
| Condition                     | 1      | 3      | 1.48    | 0.3104 |

Not Significant effect of condition factor

| Estimates      |          |        |    |         |         |       |         |         | Relative effect |      |     |
|----------------|----------|--------|----|---------|---------|-------|---------|---------|-----------------|------|-----|
| Label          | Estimate | SE     | DF | t Value | Pr >  t | Alpha | LCI     | UCI     | Estimate        | LCI  | UCI |
| Mean BKG       | 10.4746  | 0.6569 | 3  | 16.0    | 0.0005  | 0.05  | 8.3842  | 12.5650 |                 |      |     |
| Mean THS       | 10.1856  | 0.6569 | 3  | 15.5    | 0.0006  | 0.05  | 8.0952  | 12.2761 |                 |      |     |
| Mean THS - BKG | -0.2890  | 0.2374 | 3  | -1.22   | 0.3104  | 0.1   | -0.8476 | 0.2696  | -3%             | -8%  | 3%  |
| Mean THS - BKG | -0.2890  | 0.2374 | 3  | -1.22   | 0.3104  | 0.05  | -1.0444 | 0.4664  | -3%             | -10% | 4%  |

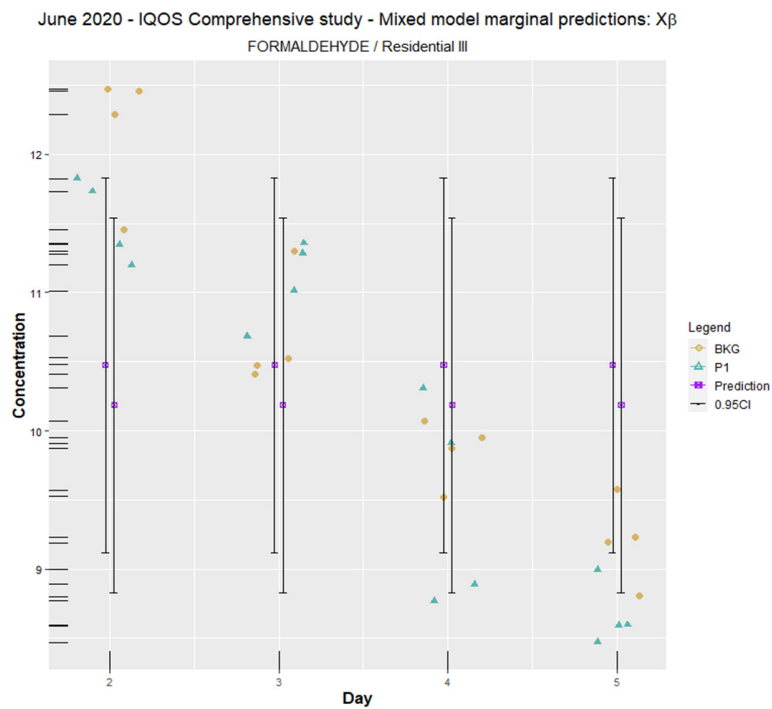

## 5.2. Data for airborne formaldehyde at simulated Store environmental condition ( $2.4\text{ h}^{-1}$ )

| Covariance Parameter Estimates |          |     |
|--------------------------------|----------|-----|
| Cov Parm                       | Estimate |     |
| Day                            | 2.09     | 90% |
| Condition*Day                  | 0.2121   | 9%  |
| Residual                       | 0.0250   | 1%  |

| Type 3 Tests of Fixed Effects |        |        |         |        |
|-------------------------------|--------|--------|---------|--------|
| Effect                        | Num DF | Den DF | F Value | Pr > F |
| Condition                     | 1      | 3      | 0       | 0.9691 |

Not Significant effect of condition factor

| Estimates      |          |        |    |         |         |       |         |        | Relative effect |      |     |
|----------------|----------|--------|----|---------|---------|-------|---------|--------|-----------------|------|-----|
| Label          | Estimate | SE     | DF | t Value | Pr >  t | Alpha | LCI     | UCI    | Estimate        | LCI  | UCI |
| Mean BKG       | 6.8049   | 0.7597 | 3  | 8.96    | 0.0020  | 0.05  | 4.5061  | 9.1038 |                 |      |     |
| Mean THS       | 6.7911   | 0.7597 | 3  | 8.94    | 0.0020  | 0.05  | 4.4922  | 9.0899 |                 |      |     |
| Mean THS - BKG | -0.0139  | 0.3304 | 3  | -0.04   | 0.9691  | 0.1   | -0.7915 | 0.7638 | 0%              | -12% | 11% |
| Mean THS - BKG | -0.0139  | 0.3304 | 3  | -0.04   | 0.9691  | 0.05  | -1.0655 | 1.0377 | 0%              | -16% | 15% |

5.3. Data for airborne formaldehyde at simulated Restaurant environmental condition (4.3 h<sup>-1</sup>)

| Covariance Parameter Estimates |          |     |                                 |
|--------------------------------|----------|-----|---------------------------------|
| Cov Parm                       | Estimate |     |                                 |
| Day                            | 0.0074   | 13% | day to day variance             |
| Condition*Day                  | 0.0206   | 37% |                                 |
| Residual                       | 0.0270   | 49% | Replicate to replicate variance |

| Type 3 Tests of Fixed Effects |        |        |         |        |
|-------------------------------|--------|--------|---------|--------|
| Effect                        | Num DF | Den DF | F Value | Pr > F |
| Condition                     | 1      | 3      | 0.01    | 0.9124 |

Not Significant effect of condition factor

| Estimates      |          |        |    |         |         |       |         |        | Relative effect |      |     |
|----------------|----------|--------|----|---------|---------|-------|---------|--------|-----------------|------|-----|
| Label          | Estimate | SE     | DF | t Value | Pr >  t | Alpha | LCI     | UCI    | Estimate        | LCI  | UCI |
| Mean BKG       | 3.3334   | 0.0931 | 3  | 35.8    | <.0001  | 0.05  | 3.0370  | 3.6297 |                 |      |     |
| Mean THS       | 3.3194   | 0.0931 | 3  | 35.6    | <.0001  | 0.05  | 3.0230  | 3.6158 |                 |      |     |
| Mean THS - BKG | -0.0140  | 0.1169 | 3  | -0.12   | 0.9124  | 0.1   | -0.2890 | 0.2610 | 0%              | -9%  | 8%  |
| Mean THS - BKG | -0.0140  | 0.1169 | 3  | -0.12   | 0.9124  | 0.05  | -0.3859 | 0.3579 | 0%              | -12% | 11% |

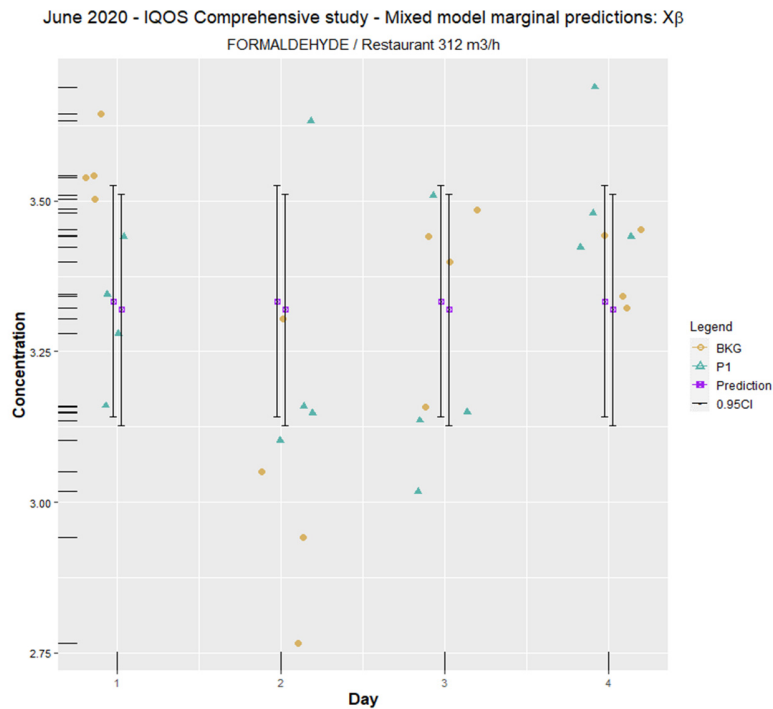

## 6. Statistical model for airborne benzene

| Model Information         |                     |
|---------------------------|---------------------|
| Data Set                  | WORK.COMPREH_IQOS   |
| Dependent Variable        | Reported_Conc       |
| Covariance Structure      | Variance Components |
| Estimation Method         | REML                |
| Residual Variance Method  | Profile             |
| Fixed Effects SE Method   | Model-Based         |
| Degrees of Freedom Method | Containment         |

### 6.1. Data for airborne benzene at simulated Residential category III environmental condition ( $0.5 \text{ h}^{-1}$ )

| Covariance Parameter Estimates |          |     |                                 |
|--------------------------------|----------|-----|---------------------------------|
| Cov Parm                       | Estimate |     |                                 |
| Day                            | 0.0112   | 91% | day to day variance             |
| Condition*Day                  | 0.0000   | 0%  |                                 |
| Residual                       | 0.0011   | 9%  | Replicate to replicate variance |

| Type 3 Tests of Fixed Effects |        |        |         |        |
|-------------------------------|--------|--------|---------|--------|
| Effect                        | Num DF | Den DF | F Value | Pr > F |
| Condition                     | 1      | 3      | 0.63    | 0.4851 |

Not Significant effect of condition factor

| Estimates      |          |        |    |         |         |       |         |        | Relative effect |     |     |
|----------------|----------|--------|----|---------|---------|-------|---------|--------|-----------------|-----|-----|
| Label          | Estimate | SE     | DF | t Value | Pr >  t | Alpha | LCI     | UCI    | Estimate        | LCI | UCI |
| Mean BKG       | 0.6277   | 0.0537 | 3  | 11.7    | 0.0013  | 0.05  | 0.4568  | 0.7985 |                 |     |     |
| Mean THS       | 0.6385   | 0.0537 | 3  | 11.9    | 0.0013  | 0.05  | 0.4677  | 0.8094 |                 |     |     |
| Mean THS - BKG | 0.0109   | 0.0137 | 3  | 0.79    | 0.4851  | 0.1   | -0.0213 | 0.0430 | 2%              | -3% | 7%  |
| Mean THS - BKG | 0.0109   | 0.0137 | 3  | 0.79    | 0.4851  | 0.05  | -0.0326 | 0.0543 | 2%              | -5% | 9%  |

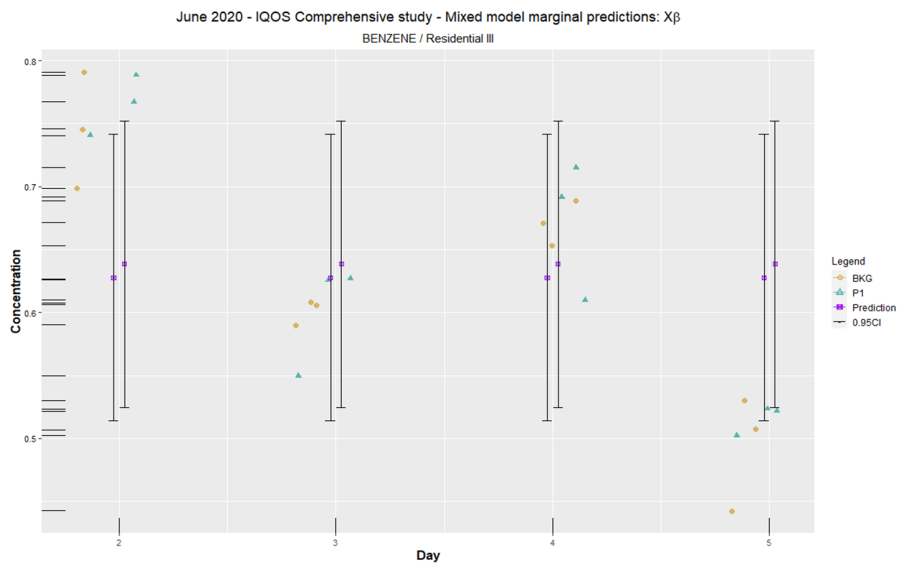

## 6.2. Data for airborne benzene at simulated Store environmental condition ( $2.4 \text{ h}^{-1}$ )

| Covariance Parameter Estimates |          |  |     |
|--------------------------------|----------|--|-----|
| Cov Parm                       | Estimate |  |     |
| Day                            | 0        |  | 0%  |
| Condition*Day                  | 0.0014   |  | 73% |
| Residual                       | 0.0005   |  | 27% |

| Type 3 Tests of Fixed Effects |        |        |         |        |
|-------------------------------|--------|--------|---------|--------|
| Effect                        | Num DF | Den DF | F Value | Pr > F |
| Condition                     | 1      | 6      | 3.1     | 0.1286 |

Not significant effect of condition factor

| Estimates      |          |        |    |         |         |       |         |        | Relative effect |      |     |
|----------------|----------|--------|----|---------|---------|-------|---------|--------|-----------------|------|-----|
| Label          | Estimate | SE     | DF | t Value | Pr >  t | Alpha | LCI     | UCI    | Estimate        | LCI  | UCI |
| Mean BKG       | 0.3622   | 0.0195 | 6  | 18.55   | <.0001  | 0.05  | 0.3144  | 0.4100 |                 |      |     |
| Mean THS       | 0.3136   | 0.0195 | 6  | 16.06   | <.0001  | 0.05  | 0.2658  | 0.3613 |                 |      |     |
| Mean THS - BKG | -0.0486  | 0.0276 | 6  | -1.76   | 0.1286  | 0.1   | -0.1023 | 0.0050 | -13%            | -28% | 1%  |

| Estimates      |          |        |    |         |         |       |         |        | Relative effect |      |     |
|----------------|----------|--------|----|---------|---------|-------|---------|--------|-----------------|------|-----|
| Label          | Estimate | SE     | DF | t Value | Pr >  t | Alpha | LCI     | UCI    | Estimate        | LCI  | UCI |
| Mean THS - BKG | -0.0486  | 0.0276 | 6  | -1.76   | 0.1286  | 0.05  | -0.1162 | 0.0189 | -13%            | -32% | 5%  |

6.3. Data for airborne benzene at simulated Restaurant environmental condition ( $4.3\text{ h}^{-1}$ )

| Covariance Parameter Estimates |          |                                     |
|--------------------------------|----------|-------------------------------------|
| Cov Parm                       | Estimate |                                     |
| Day                            | 0.0034   | 63% day to day variance             |
| Condition*Day                  | 0.0008   | 14%                                 |
| Residual                       | 0.0013   | 23% Replicate to replicate variance |

| Type 3 Tests of Fixed Effects |        |        |         |        |
|-------------------------------|--------|--------|---------|--------|
| Effect                        | Num DF | Den DF | F Value | Pr > F |
| Condition                     | 1      | 3      | 0.67    | 0.4744 |

Not Significant effect of condition factor

| Estimates      |          |        |    |         |         |       |         |        | Relative effect |      |     |
|----------------|----------|--------|----|---------|---------|-------|---------|--------|-----------------|------|-----|
| Label          | Estimate | SE     | DF | t Value | Pr >  t | Alpha | LCI     | UCI    | Estimate        | LCI  | UCI |
| Mean BKG       | 0.3838   | 0.0339 | 3  | 11.3    | 0.0015  | 0.05  | 0.2759  | 0.4917 |                 |      |     |
| Mean THS       | 0.3638   | 0.0339 | 3  | 10.7    | 0.0017  | 0.05  | 0.2560  | 0.4717 |                 |      |     |
| Mean THS - BKG | -0.0199  | 0.0244 | 3  | -0.82   | 0.4744  | 0.1   | -0.0775 | 0.0376 | -5%             | -20% | 10% |
| Mean THS - BKG | -0.0199  | 0.0244 | 3  | -0.82   | 0.4744  | 0.05  | -0.0977 | 0.0579 | -5%             | -25% | 15% |

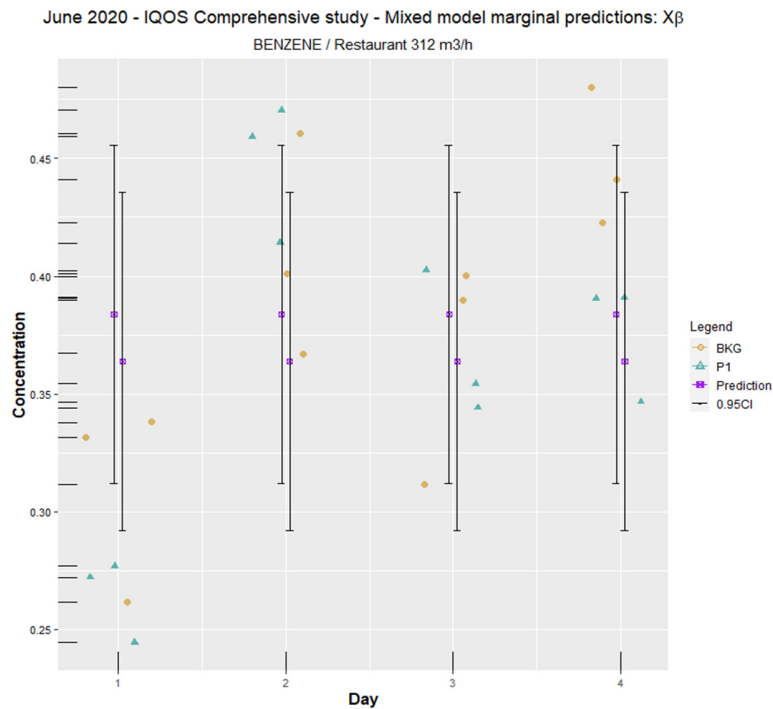

## 7. Statistical model for airborne isoprene

| Model Information         |                     |
|---------------------------|---------------------|
| Data Set                  | WORK.COMPRESH_IQOS  |
| Dependent Variable        | Reported_Conc       |
| Covariance Structure      | Variance Components |
| Estimation Method         | REML                |
| Residual Variance Method  | Profile             |
| Fixed Effects SE Method   | Model-Based         |
| Degrees of Freedom Method | Containment         |

### 7.1. Data for airborne isoprene at simulated Residential category III environmental condition ( $0.5\ h^{-1}$ )

| Covariance Parameter Estimates |          |     |                                 |
|--------------------------------|----------|-----|---------------------------------|
| Cov Parm                       | Estimate |     |                                 |
| Day                            | 0.6145   | 57% | day to day variance             |
| Condition*Day                  | 0.3728   | 34% |                                 |
| Residual                       | 0.0987   | 9%  | Replicate to replicate variance |

| Type 3 Tests of Fixed Effects |        |        |         |        |
|-------------------------------|--------|--------|---------|--------|
| Effect                        | Num DF | Den DF | F Value | Pr > F |
| Condition                     | 1      | 3      | 10.04   | 0.0505 |

Not significant effect of condition factor

| Estimates      |          |        |    |         |         |       |         |         | Relative effect |     |     |
|----------------|----------|--------|----|---------|---------|-------|---------|---------|-----------------|-----|-----|
| Label          | Estimate | SE     | DF | t Value | Pr >  t | Alpha | LCI     | UCI     | Estimate        | LCI | UCI |
| Mean BKG       | 9.1612   | 0.5050 | 3  | 18.1    | 0.0004  | 0.05  | 7.5540  | 10.7684 |                 |     |     |
| Mean THS       | 10.5886  | 0.5050 | 3  | 21.0    | 0.0002  | 0.05  | 8.9814  | 12.1958 |                 |     |     |
| Mean THS - BKG | 1.4273   | 0.4504 | 3  | 3.17    | 0.0505  | 0.1   | 0.3675  | 2.4872  | 16%             | 4%  | 27% |
| Mean THS - BKG | 1.4273   | 0.4504 | 3  | 3.17    | 0.0505  | 0.05  | -0.0059 | 2.8606  | 16%             | 0%  | 31% |

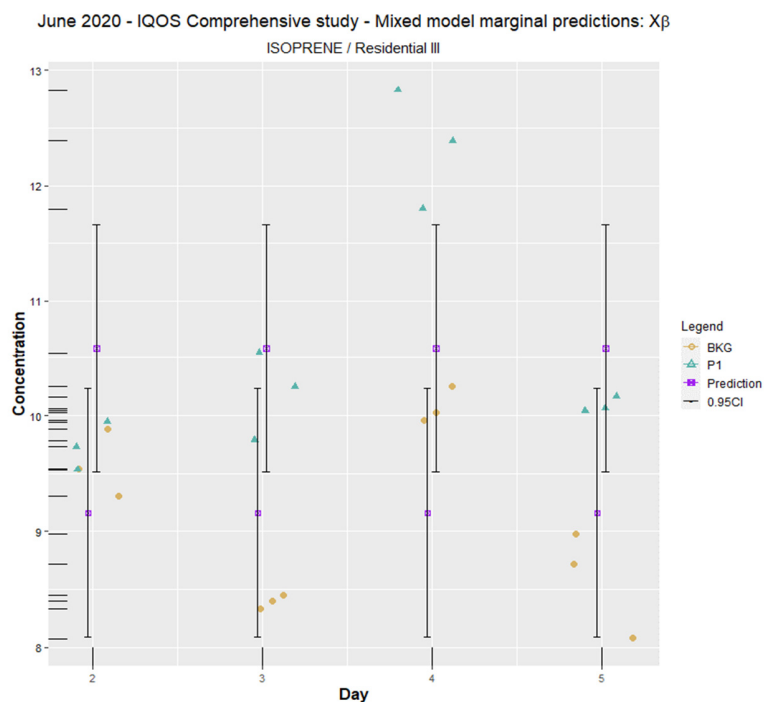

## 7.2. Data for airborne isoprene at simulated Store environmental condition ( $2.4\ h^{-1}$ )

| Covariance Parameter Estimates |          |     |  |
|--------------------------------|----------|-----|--|
| Cov Parm                       | Estimate |     |  |
| Day                            | 0.3133   | 59% |  |
| Condition*Day                  | 0.1836   | 35% |  |
| Residual                       | 0.0318   | 6%  |  |

| Type 3 Tests of Fixed Effects |        |        |         |        |
|-------------------------------|--------|--------|---------|--------|
| Effect                        | Num DF | Den DF | F Value | Pr > F |
| Condition                     | 1      | 3      | 2.2     | 0.2346 |

Not significant effect of condition factor

| Estimates      |          |        |      |         |         |       |         |        | Relative effect |      |     |
|----------------|----------|--------|------|---------|---------|-------|---------|--------|-----------------|------|-----|
| Label          | Estimate | SE     | DF   | t Value | Pr >  t | Alpha | LCI     | UCI    | Estimate        | LCI  | UCI |
| Mean BKG       | 4.4314   | 0.3562 | 4.34 | 12.4    | 0.0001  | 0.05  | 3.4726  | 5.3901 |                 |      |     |
| Mean THS       | 4.8936   | 0.3562 | 4.34 | 13.7    | <.0001  | 0.05  | 3.9348  | 5.8523 |                 |      |     |
| Mean THS - BKG | 0.4622   | 0.3116 | 3    | 1.48    | 0.2346  | 0.1   | -0.2711 | 1.1955 | 10%             | -6%  | 27% |
| Mean THS - BKG | 0.4622   | 0.3116 | 3    | 1.48    | 0.2346  | 0.05  | -0.5295 | 1.4539 | 10%             | -12% | 33% |

7.3. Data for airborne isoprene at simulated Restaurant environmental condition (4.3 h<sup>-1</sup>)

| Covariance Parameter Estimates |          |                                     |
|--------------------------------|----------|-------------------------------------|
| Cov Parm                       | Estimate |                                     |
| Day                            | 0.0231   | 54% day to day variance             |
| Condition*Day                  | 0.0013   | 3%                                  |
| Residual                       | 0.0180   | 43% Replicate to replicate variance |

| Type 3 Tests of Fixed Effects |        |        |         |        |
|-------------------------------|--------|--------|---------|--------|
| Effect                        | Num DF | Den DF | F Value | Pr > F |
| Condition                     | 1      | 3      | 17.3    | 0.0254 |

Significant effect of condition factor

| Estimates      |          |        |    |         |         |       |        |        | Relative effect |     |     |
|----------------|----------|--------|----|---------|---------|-------|--------|--------|-----------------|-----|-----|
| Label          | Estimate | SE     | DF | t Value | Pr >  t | Alpha | LCI    | UCI    | Estimate        | LCI | UCI |
| Mean BKG       | 2.2319   | 0.0871 | 3  | 25.6    | 0.0001  | 0.05  | 1.9546 | 2.5092 |                 |     |     |
| Mean THS       | 2.4829   | 0.0871 | 3  | 28.5    | <.0001  | 0.05  | 2.2057 | 2.7602 |                 |     |     |
| Mean THS - BKG | 0.2510   | 0.0605 | 3  | 4.15    | 0.0254  | 0.1   | 0.1088 | 0.3933 | 11%             | 5%  | 18% |
| Mean THS - BKG | 0.2510   | 0.0605 | 3  | 4.15    | 0.0254  | 0.05  | 0.0587 | 0.4434 | 11%             | 3%  | 20% |

# June 2020 - IQOS Comprehensive study - Mixed model marginal predictions: $X\beta$

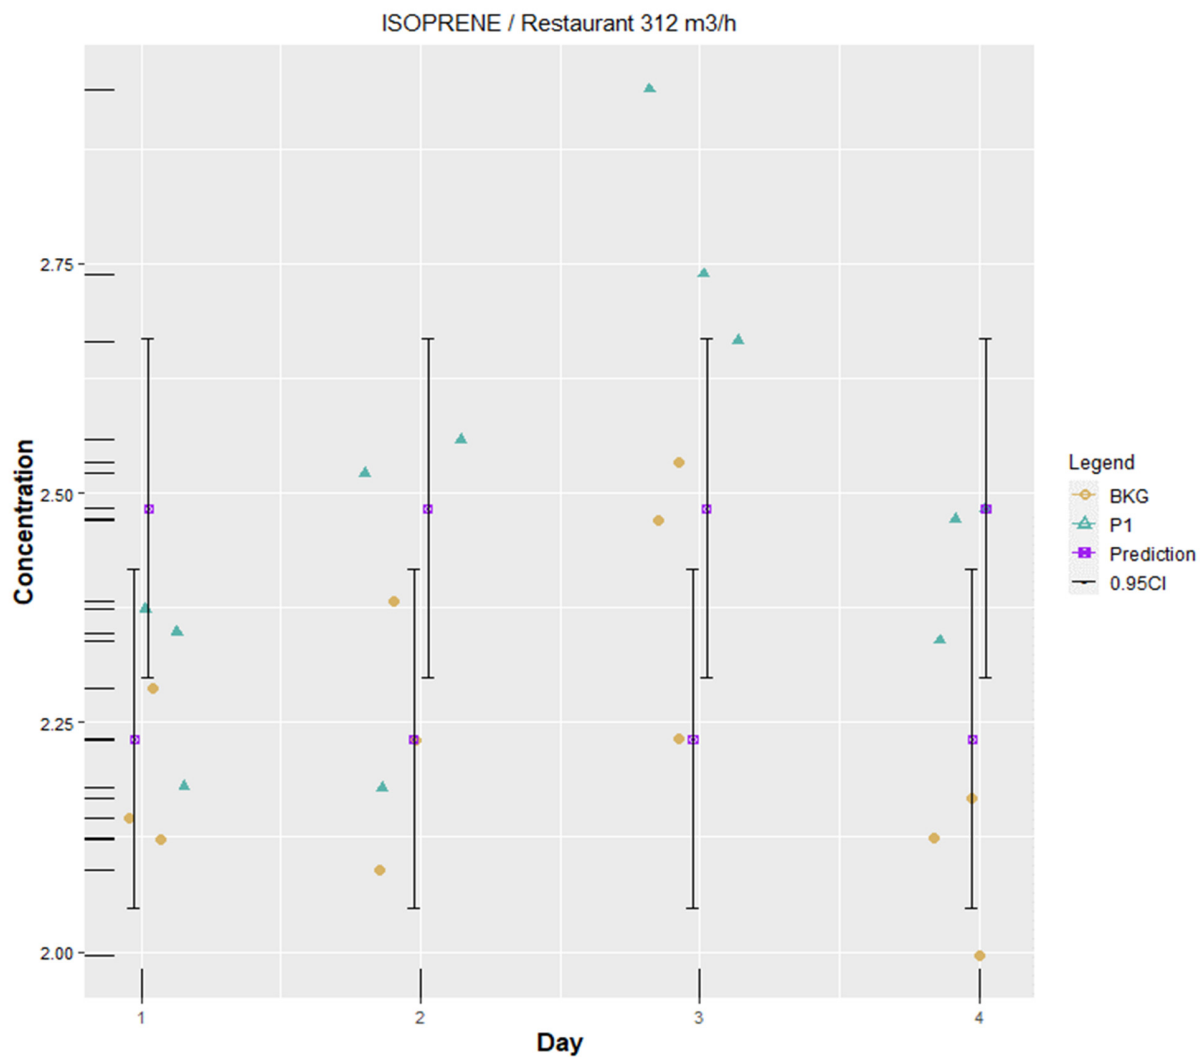

## 8. Statistical model for airborne toluene

| Model Information         |                     |
|---------------------------|---------------------|
| Data Set                  | WORK.COMPHEH_IQOS   |
| Dependent Variable        | Reported_Conc       |
| Covariance Structure      | Variance Components |
| Estimation Method         | REML                |
| Residual Variance Method  | Profile             |
| Fixed Effects SE Method   | Model-Based         |
| Degrees of Freedom Method | Containment         |

8.1. Data for airborne toluene at simulated Residential category III environmental condition ( $0.5\text{ h}^{-1}$ )

| Covariance Parameter Estimates |          |                                    |
|--------------------------------|----------|------------------------------------|
| Cov Parm                       | Estimate |                                    |
| Day                            | 0.0410   | 87% Day to day variance            |
| Condition*Day                  | 0.0036   | 8%                                 |
| Residual                       | 0.0028   | 6% Replicate to replicate variance |

| Type 3 Tests of Fixed Effects |        |        |         |        |
|-------------------------------|--------|--------|---------|--------|
| Effect                        | Num DF | Den DF | F Value | Pr > F |
| Condition                     | 1      | 3      | 2.96    | 0.1837 |

Not significant effect of Condition factor

| Estimates      |          |        |    |         |         |       |         |        | Relative effect |      |     |
|----------------|----------|--------|----|---------|---------|-------|---------|--------|-----------------|------|-----|
| Label          | Estimate | SE     | DF | t Value | Pr >  t | Alpha | LCI     | UCI    | Estimate        | LCI  | UCI |
| Mean BKG       | 1.1121   | 0.1067 | 3  | 10.4    | 0.0019  | 0.05  | 0.7724  | 1.4517 |                 |      |     |
| Mean THS       | 1.0302   | 0.1067 | 3  | 9.65    | 0.0024  | 0.05  | 0.6906  | 1.3698 |                 |      |     |
| Mean THS - BKG | -0.0819  | 0.0476 | 3  | -1.72   | 0.1837  | 0.1   | -0.1938 | 0.0301 | -7%             | -17% | 3%  |
| Mean THS - BKG | -0.0819  | 0.0476 | 3  | -1.72   | 0.1837  | 0.05  | -0.2333 | 0.0695 | -7%             | -21% | 6%  |

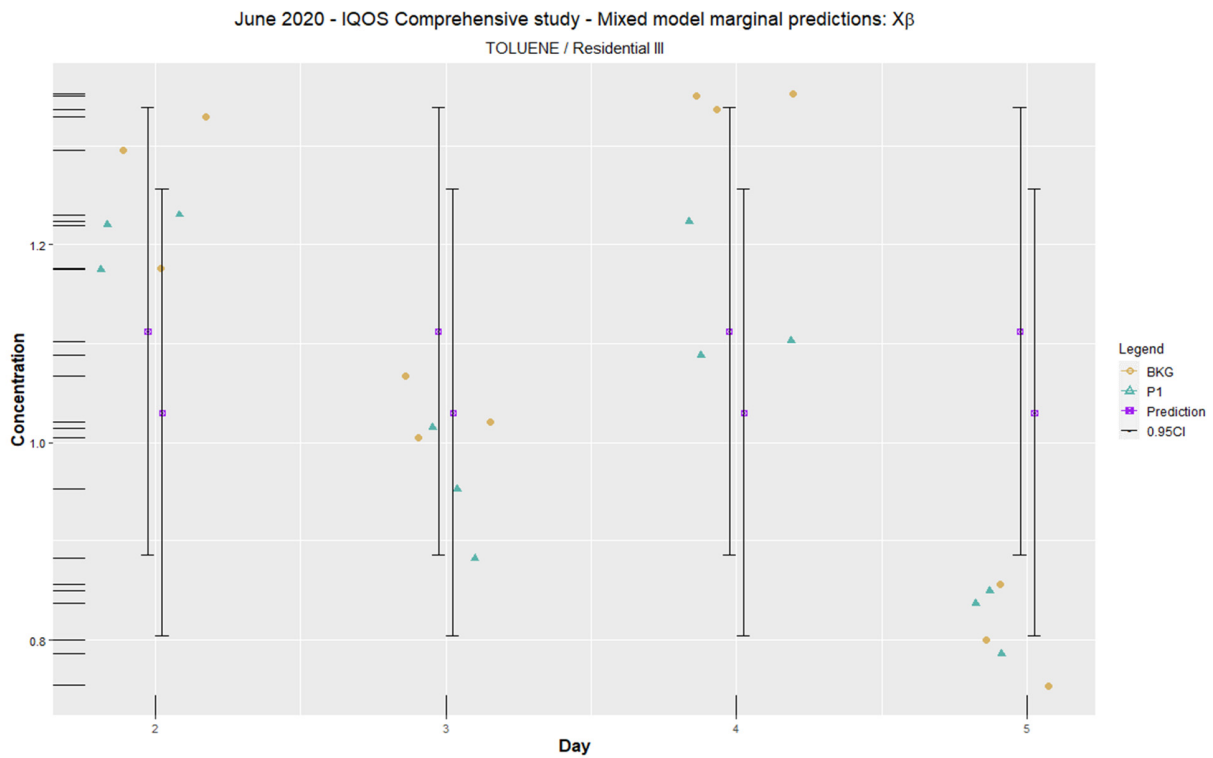

8.2. Data for airborne toluene at simulated Store environmental condition (2.4 h<sup>-1</sup>)

| Covariance Parameter Estimates |          |     |
|--------------------------------|----------|-----|
| Cov Parm                       | Estimate |     |
| Day                            | 0.1942   | 73% |
| Condition*Day                  | 0.0670   | 25% |
| Residual                       | 0.0065   | 2%  |

| Type 3 Tests of Fixed Effects |        |        |         |        |
|-------------------------------|--------|--------|---------|--------|
| Effect                        | Num DF | Den DF | F Value | Pr > F |
| Condition                     | 1      | 3      | 0.46    | 0.5451 |

Not significant effect of condition factor

| Estimates      |          |        |    |         |         |       |         |        | Relative effect |      |     |
|----------------|----------|--------|----|---------|---------|-------|---------|--------|-----------------|------|-----|
| Label          | Estimate | SE     | DF | t Value | Pr >  t | Alpha | LCI     | UCI    | Estimate        | LCI  | UCI |
| Mean BKG       | 1.2617   | 0.2566 | 4  | 4.92    | 0.0085  | 0.05  | 0.5411  | 1.9824 |                 |      |     |
| Mean THS       | 1.1352   | 0.2566 | 4  | 4.42    | 0.0122  | 0.05  | 0.4145  | 1.8558 |                 |      |     |
| Mean THS - BKG | -0.1265  | 0.1860 | 3  | -0.68   | 0.5451  | 0.1   | -0.5643 | 0.3112 | -10%            | -45% | 25% |
| Mean THS - BKG | -0.1265  | 0.1860 | 3  | -0.68   | 0.5451  | 0.05  | -0.7185 | 0.4654 | -10%            | -57% | 37% |

8.3. Data for airborne toluene at simulated Restaurant environmental condition (4.3 h<sup>-1</sup>)

| Covariance Parameter Estimates |          |                                     |
|--------------------------------|----------|-------------------------------------|
| Cov Parm                       | Estimate |                                     |
| Day                            | 0.0283   | 85% day to day variance             |
| Condition*Day                  | 0.0015   | 5%                                  |
| Residual                       | 0.0036   | 11% Replicate to replicate variance |

| Type 3 Tests of Fixed Effects |        |        |         |        |
|-------------------------------|--------|--------|---------|--------|
| Effect                        | Num DF | Den DF | F Value | Pr > F |
| Condition                     | 1      | 3      | 0.21    | 0.6754 |

Not significant effect of condition factor

| Estimates |          |        |    |         |         |       |        |        | Relative effect |     |     |
|-----------|----------|--------|----|---------|---------|-------|--------|--------|-----------------|-----|-----|
| Label     | Estimate | SE     | DF | t Value | Pr >  t | Alpha | LCI    | UCI    | Estimate        | LCI | UCI |
| Mean BKG  | 0.7175   | 0.0881 | 3  | 8.15    | 0.0039  | 0.05  | 0.4373 | 0.9978 |                 |     |     |
| Mean THS  | 0.7005   | 0.0881 | 3  | 7.96    | 0.0041  | 0.05  | 0.4203 | 0.9807 |                 |     |     |

| Estimates      |          |        |    |         |         |       |         |        | Relative effect |      |     |
|----------------|----------|--------|----|---------|---------|-------|---------|--------|-----------------|------|-----|
| Label          | Estimate | SE     | DF | t Value | Pr >  t | Alpha | LCI     | UCI    | Estimate        | LCI  | UCI |
| Mean THS - BKG | -0.0170  | 0.0369 | 3  | -0.46   | 0.6754  | 0.1   | -0.1038 | 0.0697 | -2%             | -14% | 10% |
| Mean THS - BKG | -0.0170  | 0.0369 | 3  | -0.46   | 0.6754  | 0.05  | -0.1344 | 0.1003 | -2%             | -19% | 14% |

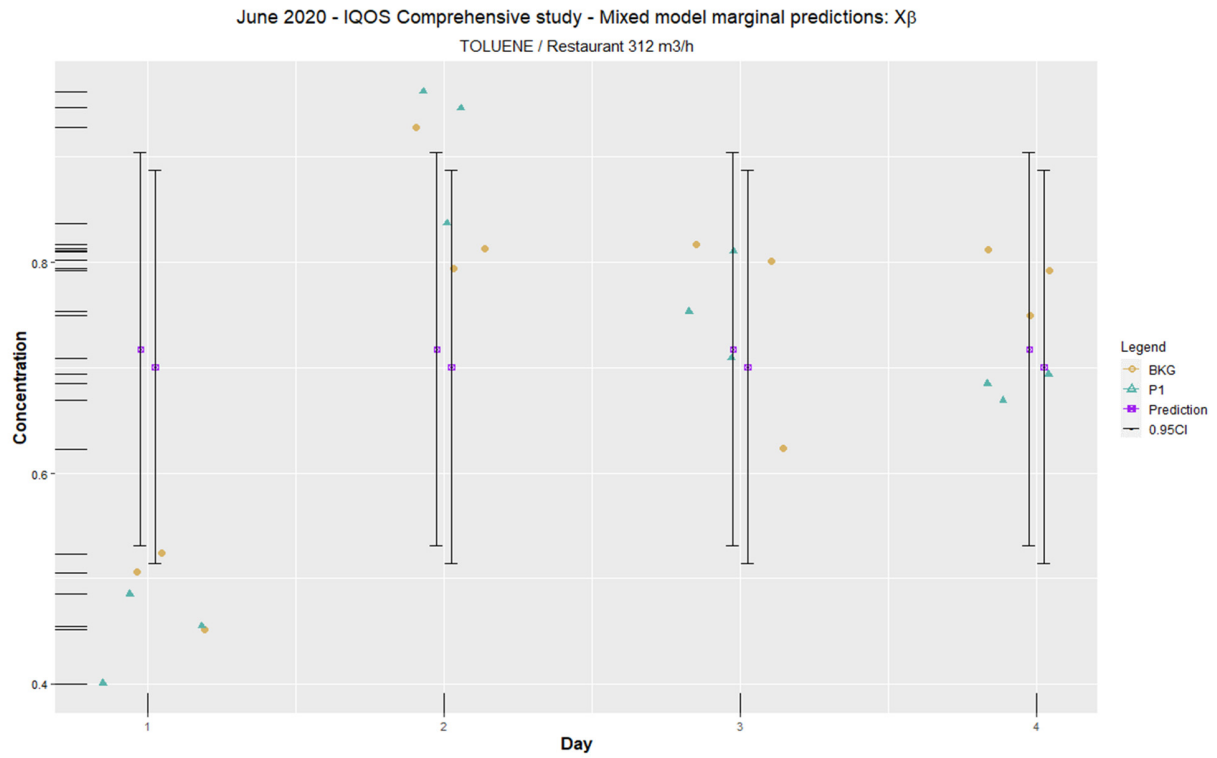

Supplement: s1 [file s1 › Supplementary Material-Statistical Modeling.pdf]
