# Supplementary material for: Comprehensive Air Quality Assessment of the Tobacco Heating System 2.2 under Simulated Indoor Environments
Source: MDPI journal article supplement (doi:10.3390/atmos12080989), 2021-07-31
Supplement: s1 [file s1]

Archive with 19 entries (19 files):
- Supplementary Figure S1-S4.pdf
- Supplementary Material-Statistical Modeling.pdf
- Supplementary Table S1.xlsx
- Supplementary Table S10.xlsx
- Supplementary Table S11.xlsx
- Supplementary Table S12.xlsx
- Supplementary Table S13.xlsx
- Supplementary Table S14.xlsx
- Supplementary Table S15.xlsx
- Supplementary Table S16.xlsx
- Supplementary Table S17.xlsx
- Supplementary Table S2.xlsx
- Supplementary Table S3.xlsx
- Supplementary Table S4.xlsx
- Supplementary Table S5.xlsx
- Supplementary Table S6.docx
- Supplementary Table S6.pdf
- Supplementary Table S6a-S6e.xlsx
- Supplementary Table S7-S9.pdf
