# Supplementary material for: Comprehensive Air Quality Assessment of the Tobacco Heating System 2.2 under Simulated Indoor Environments
Source: MDPI journal article supplement (doi:10.3390/atmos12080989), 2021-07-31
Supplement: s1 [file s1 › Supplementary Figure S1-S4.pdf]

## Supplementary Figures

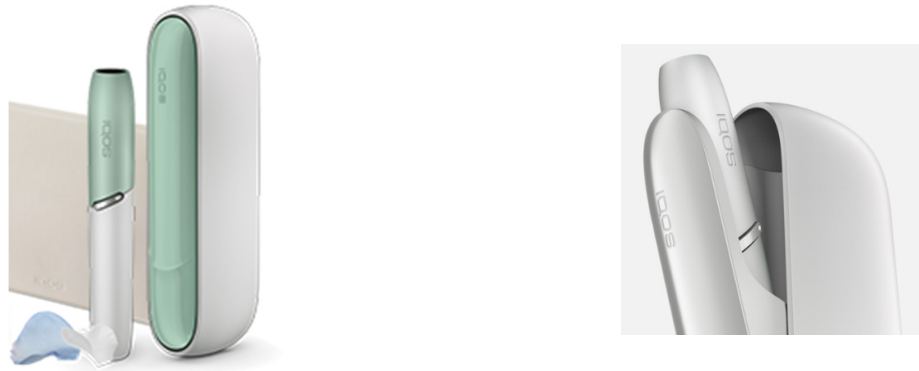

**Figure S1.** Tobacco Heating System 2.2 (THS, marketed as IQOS®). Note: IQOS 3 DUO was used in the study.

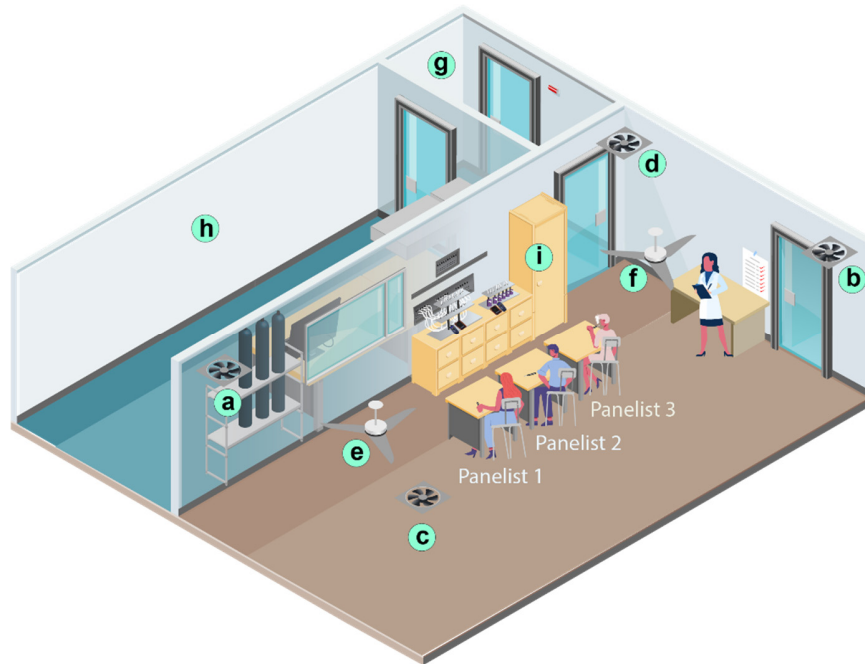

**Figure S2.** Representation of the environmentally controlled room (IAQ room). Note: (a) & (b): air inlets; (c) and (d): air outlets; (e) and (f): electrical fans; (g): airlock; (h): technical room; (i): traps and online measurement equipment.

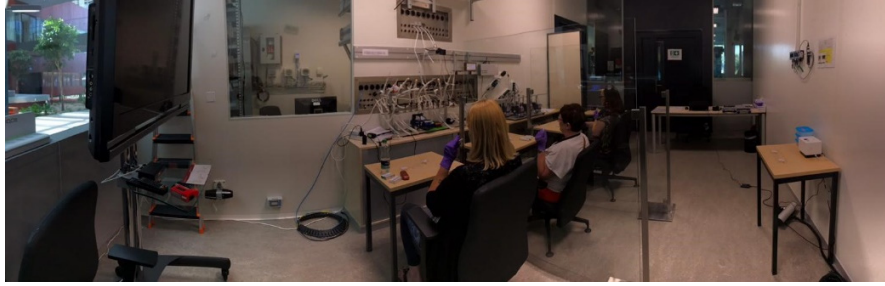

**Figure S3.** Glass panels separating the panelists during the sessions (replicate 2-4) under simulated Store environmental conditions ( $2.4 \text{ h}^{-1}$ ).

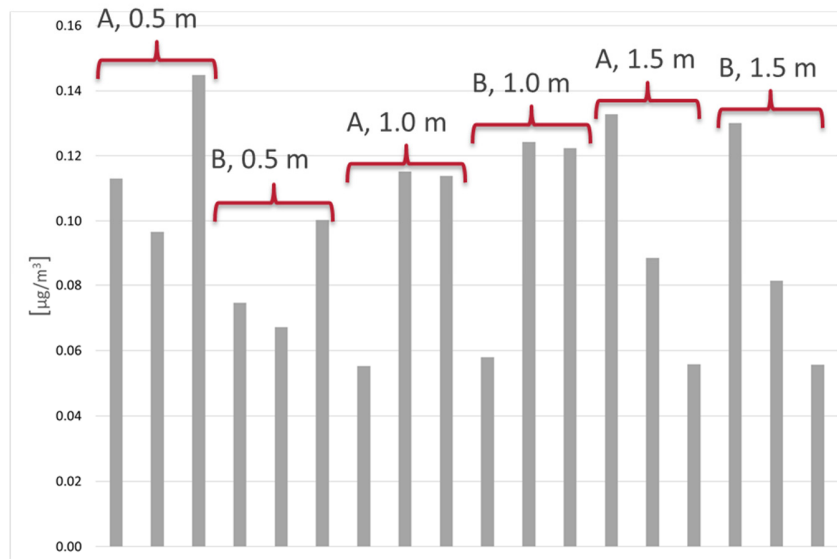

**Figure S4.** Concentrations of airborne acrolein generated by machine puffing of THS 2.2 (12 sticks, Health Canada Intense regimen,  $0.5 \text{ air h}^{-1}$ ). Note: The acrolein concentrations were measured in three consecutive experiments at three distances between the ports of portable single syringe pumps and collection traps (0.5 m, 1.0 m, 1.5 m). The collection traps (in triplicate) were at two different positions each at 90 cm of each other: position A (direction entrance) and position B (direction window).
