# Supplementary material for: Comprehensive Air Quality Assessment of the Tobacco Heating System 2.2 under Simulated Indoor Environments
Source: MDPI journal article supplement (doi:10.3390/atmos12080989), 2021-07-31
Supplement: s1 [file s1 › Supplementary Table S1.xlsx]

## Sheet: Table S1
Table S1: Parameters of simulated environments
		Convert L/s to m3/h		3.6			IAQ room	24.1	m2
								72.3	m3
EN 15251	Simulated environment	Type building	Category				qp	qp	qb	qb	qtot	qtot		Ventilation for IAQ room based on surface*	Air changes per h	Sticks/person/h	% smokers (20 %)	% smokers (20 %) rounded	No sticks (20% smokers) for 2h session	No sticks (20% smokers) for 2h session (rounded)	% smokers (100%)	No sticks (100% smokers) for 2h session	No sticks (100% smokers) for 2h session (rounded)	No sticks for 2h session (this study)
				m2/person	persons/24.1 m2	persons/24.1 m2 rounded	l/s, m2	m3/h, m2	l/s, m2	m3/h, m2	l/s, m2	m3/h, m2		m3/h
				Floor area			For occupancy		for non low-polluted building
		Single office	III	10	2.41	3	0.4	1.44	0.8	2.88	1.2	4.32		104.112	1.44	1.2	0.482	1	2.4	2.4	2.41	5.784	5.784
		Conference room	III	2	12.05	12	2	7.2	0.8	2.88	2.8	10.08		242.928	3.36	1.2	2.41	2.41	5.784	5.784	12.05	28.92	28.92
	Restaurant	Restaurant	III	1.5	16.0667	16.0667	2.8	10.08	0.8	2.88	3.6	12.96		312.336	4.32	1.2	3.21333	3.21333	7.712	7.712	16.0667	38.56	38.56	12
	Store	Department store	III	7	3.44286	3.44286	0.9	3.24	1.2	4.32	2.1	7.56		182.196	2.52	1.2	0.688571	0.688571	1.65257	1.65257	3.44286	8.26286	8.26286	12
	Residential category III		III		4	4	4							37	0.511757	1.2	0.8	0.8	1.92	1.92	4	9.6	9.6	12
																			* only room dimensions taken into account for qtot
							qp	qp	qb	qb		qtot	qtot
ASHRAE 62.1-2016				m2/person	persons/100 m2	persons/24.1 m2 rounded	l/s, m2	m3/h, m2	l/s, m2	m3/h, m2		m3/h, m2	m3/h, 100 m2	Ventilation for IAQ room based on surface and No people [m3/h]*	Air changes per h
		Office space		20	5	1.205	2.5	9	0.3	1.08		1.53	153	36.873	0.51
		Conference room		2	50	12.05	2.5	9	0.3	1.08		5.58	558	134.478	1.86
		Restaurant dining room		1.42857	70	16.87	3.8	13.68	0.9	3.24		12.816	1281.6	308.866	4.272
		Cafeteria/fast-food		1	100	24.1	3.8	13.68	0.9	3.24		16.92	1692	407.772	5.64
		Bar, cocktail lounge		1	100	24.1	3.8	13.68	0.9	3.24		16.92	1692	407.772	5.64
		Sales		6.66667	15	3.615	3.8	13.68	0.6	2.16		4.212	421.2	101.509	1.404
