# Supplementary material for: Comprehensive Air Quality Assessment of the Tobacco Heating System 2.2 under Simulated Indoor Environments
Source: MDPI journal article supplement (doi:10.3390/atmos12080989), 2021-07-31
Supplement: s1 [file s1 › Supplementary Table S2.xlsx]

## Sheet: Descriptive statistic
Table S2. Descriptive statistics
Compound	Simulated environment	Air changes/h	Session	Day Replicate	N	LOD	LLOQ	LWRL	Minimum	Maximum	Mean value	Variance	Standard Deviation
1,3-Butadiene	Residential category III	0.5	Background	1	3	0.673544	2.85732	2.85732	0.673544	0.673544	0.673544	0	0
1,3-Butadiene	Residential category III	0.5	Background	2	3	0.673544	2.85732	2.85732	0.673544	0.673544	0.673544	0	0
1,3-Butadiene	Residential category III	0.5	Background	3	3	0.673544	2.85732	2.85732	0.673544	0.673544	0.673544	0	0
1,3-Butadiene	Residential category III	0.5	Background	4	3	0.673544	2.85732	2.85732	0.673544	0.673544	0.673544	0	0
1,3-Butadiene	Residential category III	0.5	THS	1	3	0.673544	2.85732	2.85732	0.673544	0.673544	0.673544	0	0
1,3-Butadiene	Residential category III	0.5	THS	2	3	0.673544	2.85732	2.85732	0.673544	0.673544	0.673544	0	0
1,3-Butadiene	Residential category III	0.5	THS	3	3	0.673544	2.85732	2.85732	0.673544	0.673544	0.673544	0	0
1,3-Butadiene	Residential category III	0.5	THS	4	3	0.673544	2.85732	2.85732	0.673544	0.673544	0.673544	0	0
1,3-Butadiene	Store	2.4	Background	1	3	0.673544	2.85732	2.85732	0.673544	0.673544	0.673544	0	0
1,3-Butadiene	Store	2.4	Background	2	3	0.673544	2.85732	2.85732	0.673544	0.673544	0.673544	0	0
1,3-Butadiene	Store	2.4	Background	3	3	0.673544	2.85732	2.85732	0.673544	0.673544	0.673544	0	0
1,3-Butadiene	Store	2.4	Background	4	3	0.673544	2.85732	2.85732	0.673544	0.673544	0.673544	0	0
1,3-Butadiene	Store	2.4	THS	1	3	0.673544	2.85732	2.85732	0.673544	0.673544	0.673544	0	0
1,3-Butadiene	Store	2.4	THS	2	3	0.673544	2.85732	2.85732	0.673544	0.673544	0.673544	0	0
1,3-Butadiene	Store	2.4	THS	3	3	0.673544	2.85732	2.85732	0.673544	0.673544	0.673544	0	0
1,3-Butadiene	Store	2.4	THS	4	3	0.673544	2.85732	2.85732	0.673544	0.673544	0.673544	0	0
1,3-Butadiene	Restaurant	4.3	Background	1	3	0.673544	2.85732	2.85732	0.673544	0.673544	0.673544	0	0
1,3-Butadiene	Restaurant	4.3	Background	2	3	0.673544	2.85732	2.85732	0.673544	0.673544	0.673544	0	0
1,3-Butadiene	Restaurant	4.3	Background	3	3	0.673544	2.85732	2.85732	0.673544	0.673544	0.673544	0	0
1,3-Butadiene	Restaurant	4.3	Background	4	3	0.673544	2.85732	2.85732	0.673544	0.673544	0.673544	0	0
1,3-Butadiene	Restaurant	4.3	THS	1	3	0.673544	2.85732	2.85732	0.673544	0.673544	0.673544	0	0
1,3-Butadiene	Restaurant	4.3	THS	2	3	0.673544	2.85732	2.85732	0.673544	0.673544	0.673544	0	0
1,3-Butadiene	Restaurant	4.3	THS	3	3	0.673544	2.85732	2.85732	0.673544	0.673544	0.673544	0	0
1,3-Butadiene	Restaurant	4.3	THS	4	3	0.673544	2.85732	2.85732	0.673544	0.673544	0.673544	0	0
3-Ethenylpyridine	Residential category III	0.5	Background	1	4	0.0232201	0.0987917	0.469256	0.098792	0.098792	0.098792	0	0
3-Ethenylpyridine	Residential category III	0.5	Background	2	4	0.0232201	0.0987917	0.469256	0.02322	0.02322	0.02322	0	0
3-Ethenylpyridine	Residential category III	0.5	Background	3	4	0.0232201	0.0987917	0.469256	0.02322	0.02322	0.02322	0	0
3-Ethenylpyridine	Residential category III	0.5	Background	4	4	0.0232201	0.0987917	0.469256	0.02322	0.098792	0.061006	0.001904	0.043631
3-Ethenylpyridine	Residential category III	0.5	THS	1	4	0.0232201	0.0987917	0.469256	0.098792	0.098792	0.098792	0	0
3-Ethenylpyridine	Residential category III	0.5	THS	2	4	0.0232201	0.0987917	0.469256	0.02322	0.02322	0.02322	0	0
3-Ethenylpyridine	Residential category III	0.5	THS	3	4	0.0232201	0.0987917	0.469256	0.02322	0.02322	0.02322	0	0
3-Ethenylpyridine	Residential category III	0.5	THS	4	4	0.0232201	0.0987917	0.469256	0.02322	0.02322	0.02322	0	0
3-Ethenylpyridine	Store	2.4	Background	1	4	0.0232201	0.0987917	0.469256	0.02322	0.02322	0.02322	0	0
3-Ethenylpyridine	Store	2.4	Background	2	4	0.0232201	0.0987917	0.469256	0.02322	0.02322	0.02322	0	0
3-Ethenylpyridine	Store	2.4	Background	3	4	0.0232201	0.0987917	0.469256	0.02322	0.02322	0.02322	0	0
3-Ethenylpyridine	Store	2.4	Background	4	4	0.0232201	0.0987917	0.469256	0.02322	0.02322	0.02322	0	0
3-Ethenylpyridine	Store	2.4	THS	1	4	0.0232201	0.0987917	0.469256	0.02322	0.02322	0.02322	0	0
3-Ethenylpyridine	Store	2.4	THS	2	4	0.0232201	0.0987917	0.469256	0.02322	0.02322	0.02322	0	0
3-Ethenylpyridine	Store	2.4	THS	3	4	0.0232201	0.0987917	0.469256	0.02322	0.02322	0.02322	0	0
3-Ethenylpyridine	Store	2.4	THS	4	4	0.0232201	0.0987917	0.469256	0.02322	0.02322	0.02322	0	0
3-Ethenylpyridine	Restaurant	4.3	Background	1	4	0.0232201	0.0987917	0.469256	0.02322	0.02322	0.02322	0	0
3-Ethenylpyridine	Restaurant	4.3	Background	2	4	0.0232201	0.0987917	0.469256	0.02322	0.02322	0.02322	0	0
3-Ethenylpyridine	Restaurant	4.3	Background	3	4	0.0232201	0.0987917	0.469256	0.098792	0.098792	0.098792	0	0
3-Ethenylpyridine	Restaurant	4.3	Background	4	3	0.0232201	0.0987917	0.469256	0.02322	0.02322	0.02322	0	0
3-Ethenylpyridine	Restaurant	4.3	THS	1	4	0.0232201	0.0987917	0.469256	0.02322	0.02322	0.02322	0	0
3-Ethenylpyridine	Restaurant	4.3	THS	2	4	0.0232201	0.0987917	0.469256	0.02322	0.02322	0.02322	0	0
3-Ethenylpyridine	Restaurant	4.3	THS	3	4	0.0232201	0.0987917	0.469256	0.02322	0.02322	0.02322	0	0
3-Ethenylpyridine	Restaurant	4.3	THS	4	4	0.0232201	0.0987917	0.469256	0.02322	0.02322	0.02322	0	0
Acetaldehyde	Residential category III	0.5	Background	1	4	0.0270191	0.420266	3.61266	2.31386	2.40532	2.34978	0.001578	0.039728
Acetaldehyde	Residential category III	0.5	Background	2	4	0.0270191	0.420266	3.61266	1.95022	2.06633	1.99626	0.002441	0.049411
Acetaldehyde	Residential category III	0.5	Background	3	4	0.0270191	0.420266	3.61266	2.12386	2.1875	2.153	0.000694	0.026347
Acetaldehyde	Residential category III	0.5	Background	4	4	0.0270191	0.420266	3.61266	2.18202	2.3157	2.2437	0.003259	0.057088
Acetaldehyde	Residential category III	0.5	THS	1	4	0.0270191	0.420266	3.61266	5.9718	6.27464	6.13343	0.024857	0.157662
Acetaldehyde	Residential category III	0.5	THS	2	4	0.0270191	0.420266	3.61266	5.5801	5.94951	5.74677	0.025769	0.160526
Acetaldehyde	Residential category III	0.5	THS	3	4	0.0270191	0.420266	3.61266	5.2305	5.84228	5.5992	0.072444	0.269155
Acetaldehyde	Residential category III	0.5	THS	4	4	0.0270191	0.420266	3.61266	5.89849	6.10252	6.00992	0.008432	0.091825
Acetaldehyde	Store	2.4	Background	1	4	0.0270191	0.420266	3.61266	1.25301	1.33405	1.30242	0.001214	0.034838
Acetaldehyde	Store	2.4	Background	2	4	0.0270191	0.420266	3.61266	3.11289	3.25033	3.18984	0.003318	0.057605
Acetaldehyde	Store	2.4	Background	3	4	0.0270191	0.420266	3.61266	2.93886	3.01632	2.98745	0.001145	0.033841
Acetaldehyde	Store	2.4	Background	4	4	0.0270191	0.420266	3.61266	3.3188	3.4368	3.38363	0.002502	0.050022
Acetaldehyde	Store	2.4	THS	1	4	0.0270191	0.420266	3.61266	2.77326	2.89942	2.84225	0.003868	0.06219
Acetaldehyde	Store	2.4	THS	2	4	0.0270191	0.420266	3.61266	4.26891	4.95878	4.66534	0.084317	0.290373
Acetaldehyde	Store	2.4	THS	3	4	0.0270191	0.420266	3.61266	4.02595	4.17696	4.12583	0.00482	0.069424
Acetaldehyde	Store	2.4	THS	4	4	0.0270191	0.420266	3.61266	4.18361	4.66103	4.43653	0.038335	0.195792
Acetaldehyde	Restaurant	4.3	Background	1	4	0.0270191	0.420266	3.61266	1.23453	1.2525	1.24155	5.9e-05	0.007681
Acetaldehyde	Restaurant	4.3	Background	2	4	0.0270191	0.420266	3.61266	0.899815	1.00723	0.947045	0.002886	0.053717
Acetaldehyde	Restaurant	4.3	Background	3	4	0.0270191	0.420266	3.61266	2.63068	2.73545	2.69464	0.002008	0.044813
Acetaldehyde	Restaurant	4.3	Background	4	4	0.0270191	0.420266	3.61266	1.09842	1.1349	1.11455	0.000286	0.016926
Acetaldehyde	Restaurant	4.3	THS	1	4	0.0270191	0.420266	3.61266	2.00621	2.29793	2.16285	0.015977	0.1264
Acetaldehyde	Restaurant	4.3	THS	2	4	0.0270191	0.420266	3.61266	1.83776	1.9861	1.89791	0.004085	0.063916
Acetaldehyde	Restaurant	4.3	THS	3	4	0.0270191	0.420266	3.61266	2.30471	2.45101	2.37335	0.004562	0.06754
Acetaldehyde	Restaurant	4.3	THS	4	4	0.0270191	0.420266	3.61266	2.17048	2.27543	2.24377	0.002456	0.049554
Acrolein	Residential category III	0.5	Background	1	4	0.00273227	0.0596784	0.283346	0.058057	0.058545	0.058279	4.755e-08	0.000218
Acrolein	Residential category III	0.5	Background	2	4	0.00273227	0.0596784	0.283346	0.056588	0.058164	0.057504	5.475e-07	0.00074
Acrolein	Residential category III	0.5	Background	3	4	0.00273227	0.0596784	0.283346	0.056756	0.058123	0.057193	3.929e-07	0.000627
Acrolein	Residential category III	0.5	Background	4	4	0.00273227	0.0596784	0.283346	0.058026	0.059389	0.058396	4.388e-07	0.000662
Acrolein	Residential category III	0.5	THS	1	4	0.00273227	0.0596784	0.283346	0.089557	0.098536	0.094301	2.3e-05	0.004772
Acrolein	Residential category III	0.5	THS	2	4	0.00273227	0.0596784	0.283346	0.094286	0.107198	0.099259	3.1e-05	0.005546
Acrolein	Residential category III	0.5	THS	3	4	0.00273227	0.0596784	0.283346	0.104512	0.118607	0.110871	5.3e-05	0.007247
Acrolein	Residential category III	0.5	THS	4	4	0.00273227	0.0596784	0.283346	0.119172	0.125208	0.122086	6.383e-06	0.002527
Acrolein	Store	2.4	Background	1	4	0.00273227	0.0596784	0.283346	0.058601	0.05915	0.058837	5.26e-08	0.000229
Acrolein	Store	2.4	Background	2	4	0.00273227	0.0596784	0.283346	0.05846	0.058945	0.058654	4.783e-08	0.000219
Acrolein	Store	2.4	Background	3	4	0.00273227	0.0596784	0.283346	0.057736	0.058757	0.058187	2.741e-07	0.000524
Acrolein	Store	2.4	Background	4	4	0.00273227	0.0596784	0.283346	0.055739	0.058011	0.05651	1.094e-06	0.001046
Acrolein	Store	2.4	THS	1	4	0.00273227	0.0596784	0.283346	0.05703	0.059241	0.058037	1.122e-06	0.001059
Acrolein	Store	2.4	THS	2	4	0.00273227	0.0596784	0.283346	0.057291	0.058972	0.058076	5.388e-07	0.000734
Acrolein	Store	2.4	THS	3	4	0.00273227	0.0596784	0.283346	0.05778	0.058914	0.058114	2.9e-07	0.000539
Acrolein	Store	2.4	THS	4	4	0.00273227	0.0596784	0.283346	0.091182	0.097054	0.094128	6.174e-06	0.002485
Acrolein	Restaurant	4.3	Background	1	4	0.00273227	0.0596784	0.283346	0.002609	0.002629	0.002618	1.09e-10	1e-05
Acrolein	Restaurant	4.3	Background	2	4	0.00273227	0.0596784	0.283346	0.002564	0.002681	0.002619	2.301e-09	4.8e-05
Acrolein	Restaurant	4.3	Background	3	4	0.00273227	0.0596784	0.283346	0.002618	0.002669	0.002643	4.82e-10	2.2e-05
Acrolein	Restaurant	4.3	Background	4	4	0.00273227	0.0596784	0.283346	0.002589	0.002683	0.002621	1.781e-09	4.2e-05
Acrolein	Restaurant	4.3	THS	1	4	0.00273227	0.0596784	0.283346	0.002611	0.002661	0.002636	4.29e-10	2.1e-05
Acrolein	Restaurant	4.3	THS	2	4	0.00273227	0.0596784	0.283346	0.002611	0.002667	0.002642	6.97e-10	2.6e-05
Acrolein	Restaurant	4.3	THS	3	4	0.00273227	0.0596784	0.283346	0.057432	0.058169	0.057761	9.434e-08	0.000307
Acrolein	Restaurant	4.3	THS	4	4	0.00273227	0.0596784	0.283346	0.056842	0.057894	0.057218	2.146e-07	0.000463
Acrylonitrile	Residential category III	0.5	Background	1	3	0.137136	0.724261	0.724261	0.137136	0.137136	0.137136	0	0
Acrylonitrile	Residential category III	0.5	Background	2	3	0.137136	0.724261	0.724261	0.137136	0.137136	0.137136	0	0
Acrylonitrile	Residential category III	0.5	Background	3	3	0.137136	0.724261	0.724261	0.137136	0.137136	0.137136	0	0
Acrylonitrile	Residential category III	0.5	Background	4	3	0.137136	0.724261	0.724261	0.137136	0.137136	0.137136	0	0
Acrylonitrile	Residential category III	0.5	THS	1	3	0.137136	0.724261	0.724261	0.137136	0.137136	0.137136	0	0
Acrylonitrile	Residential category III	0.5	THS	2	3	0.137136	0.724261	0.724261	0.137136	0.137136	0.137136	0	0
Acrylonitrile	Residential category III	0.5	THS	3	3	0.137136	0.724261	0.724261	0.137136	0.137136	0.137136	0	0
Acrylonitrile	Residential category III	0.5	THS	4	3	0.137136	0.724261	0.724261	0.137136	0.137136	0.137136	0	0
Acrylonitrile	Store	2.4	Background	1	3	0.137136	0.724261	0.724261	0.137136	0.137136	0.137136	0	0
Acrylonitrile	Store	2.4	Background	2	3	0.137136	0.724261	0.724261	0.137136	0.137136	0.137136	0	0
Acrylonitrile	Store	2.4	Background	3	3	0.137136	0.724261	0.724261	0.137136	0.137136	0.137136	0	0
Acrylonitrile	Store	2.4	Background	4	3	0.137136	0.724261	0.724261	0.137136	0.137136	0.137136	0	0
Acrylonitrile	Store	2.4	THS	1	3	0.137136	0.724261	0.724261	0.137136	0.137136	0.137136	0	0
Acrylonitrile	Store	2.4	THS	2	3	0.137136	0.724261	0.724261	0.137136	0.137136	0.137136	0	0
Acrylonitrile	Store	2.4	THS	3	3	0.137136	0.724261	0.724261	0.137136	0.137136	0.137136	0	0
Acrylonitrile	Store	2.4	THS	4	3	0.137136	0.724261	0.724261	0.137136	0.137136	0.137136	0	0
Acrylonitrile	Restaurant	4.3	Background	1	3	0.137136	0.724261	0.724261	0.137136	0.137136	0.137136	0	0
Acrylonitrile	Restaurant	4.3	Background	2	3	0.137136	0.724261	0.724261	0.137136	0.137136	0.137136	0	0
Acrylonitrile	Restaurant	4.3	Background	3	3	0.137136	0.724261	0.724261	0.137136	0.137136	0.137136	0	0
Acrylonitrile	Restaurant	4.3	Background	4	3	0.137136	0.724261	0.724261	0.137136	0.137136	0.137136	0	0
Acrylonitrile	Restaurant	4.3	THS	1	3	0.137136	0.724261	0.724261	0.137136	0.137136	0.137136	0	0
Acrylonitrile	Restaurant	4.3	THS	2	3	0.137136	0.724261	0.724261	0.137136	0.137136	0.137136	0	0
Acrylonitrile	Restaurant	4.3	THS	3	3	0.137136	0.724261	0.724261	0.137136	0.137136	0.137136	0	0
Acrylonitrile	Restaurant	4.3	THS	4	3	0.137136	0.724261	0.724261	0.137136	0.137136	0.137136	0	0
Benzene	Residential category III	0.5	Background	1	3	0.0240291	0.0901569	0.339806	0.698841	0.79081	0.745119	0.002115	0.045987
Benzene	Residential category III	0.5	Background	2	3	0.0240291	0.0901569	0.339806	0.590263	0.607787	0.601433	9.4e-05	0.009704
Benzene	Residential category III	0.5	Background	3	3	0.0240291	0.0901569	0.339806	0.653017	0.688618	0.67103	0.000317	0.017805
Benzene	Residential category III	0.5	Background	4	3	0.0240291	0.0901569	0.339806	0.442484	0.529822	0.493059	0.00205	0.045278
Benzene	Residential category III	0.5	THS	1	3	0.0240291	0.0901569	0.339806	0.740606	0.788162	0.765432	0.000569	0.023847
Benzene	Residential category III	0.5	THS	2	3	0.0240291	0.0901569	0.339806	0.549804	0.62678	0.600768	0.001948	0.04414
Benzene	Residential category III	0.5	THS	3	3	0.0240291	0.0901569	0.339806	0.609766	0.715311	0.672297	0.003071	0.055413
Benzene	Residential category III	0.5	THS	4	3	0.0240291	0.0901569	0.339806	0.502093	0.523075	0.515539	0.000136	0.011673
Benzene	Store	2.4	Background	1	3	0.0240291	0.0901569	0.339806	0.357144	0.372752	0.364508	6.1e-05	0.007841
Benzene	Store	2.4	Background	2	3	0.0240291	0.0901569	0.339806	0.361192	0.408354	0.385141	0.000556	0.02359
Benzene	Store	2.4	Background	3	3	0.0240291	0.0901569	0.339806	0.309112	0.320016	0.31431	3e-05	0.00547
Benzene	Store	2.4	Background	4	3	0.0240291	0.0901569	0.339806	0.35379	0.436794	0.384832	0.002051	0.045284
Benzene	Store	2.4	THS	1	3	0.0240291	0.0901569	0.339806	0.293144	0.325791	0.308134	0.000272	0.016486
Benzene	Store	2.4	THS	2	3	0.0240291	0.0901569	0.339806	0.23789	0.276598	0.253984	0.000406	0.020161
Benzene	Store	2.4	THS	3	3	0.0240291	0.0901569	0.339806	0.323737	0.360025	0.338403	0.000365	0.019118
Benzene	Store	2.4	THS	4	3	0.0240291	0.0901569	0.339806	0.331655	0.364763	0.353727	0.000365	0.019115
Benzene	Restaurant	4.3	Background	1	3	0.0240291	0.0901569	0.339806	0.261501	0.337953	0.31033	0.001798	0.042408
Benzene	Restaurant	4.3	Background	2	3	0.0240291	0.0901569	0.339806	0.367226	0.460685	0.409632	0.00224	0.047326
Benzene	Restaurant	4.3	Background	3	3	0.0240291	0.0901569	0.339806	0.311743	0.400009	0.36715	0.002329	0.04826
Benzene	Restaurant	4.3	Background	4	3	0.0240291	0.0901569	0.339806	0.422807	0.480105	0.448019	0.000856	0.029261
Benzene	Restaurant	4.3	THS	1	3	0.0240291	0.0901569	0.339806	0.244444	0.276875	0.264431	0.000306	0.017482
Benzene	Restaurant	4.3	THS	2	3	0.0240291	0.0901569	0.339806	0.414118	0.470434	0.44795	0.000889	0.029824
Benzene	Restaurant	4.3	THS	3	3	0.0240291	0.0901569	0.339806	0.344068	0.402478	0.366981	0.000972	0.031172
Benzene	Restaurant	4.3	THS	4	3	0.0240291	0.0901569	0.339806	0.34652	0.390936	0.376013	0.000652	0.025543
Cathehol	Residential category III	0.5	Background	1	4	2.02614	10.2287	10.2287	10.2287	10.2287	10.2287	0	0
Cathehol	Residential category III	0.5	Background	2	4	2.02614	10.2287	10.2287	10.2287	11.2931	10.6665	0.279321	0.528508
Cathehol	Residential category III	0.5	Background	3	4	2.02614	10.2287	10.2287	10.2287	10.5106	10.2992	0.019871	0.140966
Cathehol	Residential category III	0.5	Background	4	4	2.02614	10.2287	10.2287	2.02614	2.02614	2.02614	0	0
Cathehol	Residential category III	0.5	THS	1	4	2.02614	10.2287	10.2287	10.2287	10.2948	10.2452	0.001092	0.033041
Cathehol	Residential category III	0.5	THS	2	4	2.02614	10.2287	10.2287	10.2287	11.7031	10.5973	0.543476	0.737208
Cathehol	Residential category III	0.5	THS	3	4	2.02614	10.2287	10.2287	10.2287	11.8721	10.6395	0.675167	0.821685
Cathehol	Residential category III	0.5	THS	4	4	2.02614	10.2287	10.2287	2.02614	10.2142	6.12019	22.3482	4.72739
Cathehol	Store	2.4	Background	1	4	2.02614	10.2287	10.2287	2.02614	10.2142	4.07317	16.7612	4.09404
Cathehol	Store	2.4	THS	1	4	2.02614	10.2287	10.2287	10.2142	10.2142	10.2142	0	0
Cathehol	Restaurant	4.3	Background	1	4	2.02614	10.2287	10.2287	2.02614	10.2142	6.12019	22.3482	4.72739
Cathehol	Restaurant	4.3	Background	2	4	2.02614	10.2287	10.2287	2.02614	10.2142	8.16721	16.7612	4.09404
Cathehol	Restaurant	4.3	Background	3	4	2.02614	10.2287	10.2287	2.02614	10.2142	6.12019	22.3482	4.72739
Cathehol	Restaurant	4.3	Background	4	4	2.02614	10.2287	10.2287	2.02614	10.2142	6.12019	22.3482	4.72739
Cathehol	Restaurant	4.3	THS	1	4	2.02614	10.2287	10.2287	10.2142	10.2142	10.2142	0	0
Cathehol	Restaurant	4.3	THS	2	4	2.02614	10.2287	10.2287	10.2142	10.2142	10.2142	0	0
Cathehol	Restaurant	4.3	THS	3	4	2.02614	10.2287	10.2287	10.2142	10.2142	10.2142	0	0
Cathehol	Restaurant	4.3	THS	4	4	2.02614	10.2287	10.2287	10.2142	10.2142	10.2142	0	0
Crotonaldehyde	Residential category III	0.5	Background	1	4	0.0030686	0.0677961	0.40075	0.066276	0.066833	0.06653	6.197e-08	0.000249
Crotonaldehyde	Residential category III	0.5	Background	2	4	0.0030686	0.0677961	0.40075	0.064599	0.066398	0.065645	7.135e-07	0.000845
Crotonaldehyde	Residential category III	0.5	Background	3	4	0.0030686	0.0677961	0.40075	0.06479	0.066351	0.065289	5.12e-07	0.000716
Crotonaldehyde	Residential category III	0.5	Background	4	4	0.0030686	0.0677961	0.40075	0.066241	0.067796	0.066663	5.718e-07	0.000756
Crotonaldehyde	Residential category III	0.5	THS	1	4	0.0030686	0.0677961	0.40075	0.057984	0.06072	0.058927	1.492e-06	0.001221
Crotonaldehyde	Residential category III	0.5	THS	2	4	0.0030686	0.0677961	0.40075	0.057065	0.058805	0.057833	6.738e-07	0.000821
Crotonaldehyde	Residential category III	0.5	THS	3	4	0.0030686	0.0677961	0.40075	0.057438	0.058188	0.057669	1.22e-07	0.000349
Crotonaldehyde	Residential category III	0.5	THS	4	4	0.0030686	0.0677961	0.40075	0.059096	0.059918	0.059589	1.472e-07	0.000384
Crotonaldehyde	Store	2.4	Background	1	4	0.0030686	0.0677961	0.40075	0.066897	0.067523	0.067167	6.855e-08	0.000262
Crotonaldehyde	Store	2.4	Background	2	4	0.0030686	0.0677961	0.40075	0.066736	0.06729	0.066957	6.234e-08	0.00025
Crotonaldehyde	Store	2.4	Background	3	4	0.0030686	0.0677961	0.40075	0.065909	0.067075	0.066425	3.572e-07	0.000598
Crotonaldehyde	Store	2.4	Background	4	4	0.0030686	0.0677961	0.40075	0.06363	0.066223	0.06451	1.426e-06	0.001194
Crotonaldehyde	Store	2.4	THS	1	4	0.0030686	0.0677961	0.40075	0.057259	0.059479	0.058153	1.009e-06	0.001004
Crotonaldehyde	Store	2.4	THS	2	4	0.0030686	0.0677961	0.40075	0.057521	0.059209	0.05831	5.431e-07	0.000737
Crotonaldehyde	Store	2.4	THS	3	4	0.0030686	0.0677961	0.40075	0.058012	0.059151	0.058347	2.924e-07	0.000541
Crotonaldehyde	Store	2.4	THS	4	4	0.0030686	0.0677961	0.40075	0.05682	0.059755	0.058283	1.512e-06	0.00123
Crotonaldehyde	Restaurant	4.3	Background	1	4	0.0030686	0.0677961	0.40075	0.065046	0.065545	0.065278	6.787e-08	0.000261
Crotonaldehyde	Restaurant	4.3	Background	2	4	0.0030686	0.0677961	0.40075	0.063926	0.066844	0.065302	1.431e-06	0.001196
Crotonaldehyde	Restaurant	4.3	Background	3	4	0.0030686	0.0677961	0.40075	0.065272	0.066543	0.06589	2.995e-07	0.000547
Crotonaldehyde	Restaurant	4.3	Background	4	4	0.0030686	0.0677961	0.40075	0.064546	0.066891	0.065353	1.107e-06	0.001052
Crotonaldehyde	Restaurant	4.3	THS	1	4	0.0030686	0.0677961	0.40075	0.057249	0.058346	0.057808	2.061e-07	0.000454
Crotonaldehyde	Restaurant	4.3	THS	2	4	0.0030686	0.0677961	0.40075	0.057269	0.058484	0.057942	3.354e-07	0.000579
Crotonaldehyde	Restaurant	4.3	THS	3	4	0.0030686	0.0677961	0.40075	0.057662	0.058402	0.057993	9.51e-08	0.000308
Crotonaldehyde	Restaurant	4.3	THS	4	4	0.0030686	0.0677961	0.40075	0.05707	0.058127	0.057448	2.163e-07	0.000465
Formaldehyde	Residential category III	0.5	Background	1	4	0.0295489	0.311574	8.82421	11.4521	12.4738	12.1674	0.234386	0.484135
Formaldehyde	Residential category III	0.5	Background	2	4	0.0295489	0.311574	8.82421	10.4099	11.2972	10.6779	0.172723	0.4156
Formaldehyde	Residential category III	0.5	Background	3	4	0.0295489	0.311574	8.82421	9.52446	10.0741	9.85488	0.055381	0.235332
Formaldehyde	Residential category III	0.5	Background	4	4	0.0295489	0.311574	8.82421	8.80252	9.57083	9.19836	0.098831	0.314375
Formaldehyde	Residential category III	0.5	THS	1	4	0.0295489	0.311574	8.82421	11.2026	11.8237	11.5266	0.089511	0.299184
Formaldehyde	Residential category III	0.5	THS	2	4	0.0295489	0.311574	8.82421	10.6835	11.3563	11.0834	0.092998	0.304956
Formaldehyde	Residential category III	0.5	THS	3	4	0.0295489	0.311574	8.82421	8.76916	10.3104	9.46962	0.575464	0.758594
Formaldehyde	Residential category III	0.5	THS	4	4	0.0295489	0.311574	8.82421	8.47021	8.99687	8.663	0.052878	0.229952
Formaldehyde	Store	2.4	Background	1	4	0.0295489	0.311574	8.82421	4.60079	4.93215	4.74167	0.019308	0.138953
Formaldehyde	Store	2.4	Background	2	4	0.0295489	0.311574	8.82421	7.38644	7.63818	7.49861	0.013591	0.116579
Formaldehyde	Store	2.4	Background	3	4	0.0295489	0.311574	8.82421	7.13464	7.25213	7.18791	0.002362	0.048604
Formaldehyde	Store	2.4	Background	4	4	0.0295489	0.311574	8.82421	7.61839	7.86698	7.79155	0.013911	0.117946
Formaldehyde	Store	2.4	THS	1	4	0.0295489	0.311574	8.82421	4.335	4.73891	4.50301	0.029058	0.170464
Formaldehyde	Store	2.4	THS	2	4	0.0295489	0.311574	8.82421	6.54779	6.91631	6.73312	0.029895	0.172901
Formaldehyde	Store	2.4	THS	3	4	0.0295489	0.311574	8.82421	7.79764	8.1505	7.99251	0.025593	0.159977
Formaldehyde	Store	2.4	THS	4	4	0.0295489	0.311574	8.82421	7.63348	8.25896	7.93556	0.065974	0.256854
Formaldehyde	Restaurant	4.3	Background	1	4	0.0295489	0.311574	8.82421	3.50259	3.64457	3.55669	0.003741	0.061163
Formaldehyde	Restaurant	4.3	Background	2	4	0.0295489	0.311574	8.82421	2.7667	3.3038	3.01573	0.050578	0.224896
Formaldehyde	Restaurant	4.3	Background	3	4	0.0295489	0.311574	8.82421	3.1587	3.48571	3.37085	0.021281	0.145881
Formaldehyde	Restaurant	4.3	Background	4	4	0.0295489	0.311574	8.82421	3.32273	3.453	3.39017	0.004514	0.067186
Formaldehyde	Restaurant	4.3	THS	1	4	0.0295489	0.311574	8.82421	3.15997	3.44042	3.30626	0.013849	0.117682
Formaldehyde	Restaurant	4.3	THS	2	4	0.0295489	0.311574	8.82421	3.10203	3.63223	3.26043	0.062052	0.249102
Formaldehyde	Restaurant	4.3	THS	3	4	0.0295489	0.311574	8.82421	3.01789	3.50907	3.20294	0.045131	0.212441
Formaldehyde	Restaurant	4.3	THS	4	4	0.0295489	0.311574	8.82421	3.42286	3.6885	3.50793	0.015066	0.122745
FPM-scopoletin	Residential category III	0.5	Background	1	4	0.00132157	0.00534608	0.127451	0.001322	0.01902	0.009571	6e-05	0.007766
FPM-scopoletin	Residential category III	0.5	Background	2	4	0.00132157	0.00534608	0.127451	0.001322	0.005346	0.003334	5.399e-06	0.002324
FPM-scopoletin	Residential category III	0.5	Background	3	4	0.00132157	0.00534608	0.127451	0.00549	0.007843	0.007059	1.128e-06	0.001062
FPM-scopoletin	Residential category III	0.5	Background	4	4	0.00132157	0.00534608	0.127451	0.005346	0.061046	0.024302	0.00069	0.026265
FPM-scopoletin	Residential category III	0.5	THS	1	4	0.00132157	0.00534608	0.127451	0.073529	0.101275	0.085931	0.000201	0.014183
FPM-scopoletin	Residential category III	0.5	THS	2	4	0.00132157	0.00534608	0.127451	0.057059	0.071176	0.064044	3.8e-05	0.00617
FPM-scopoletin	Residential category III	0.5	THS	3	4	0.00132157	0.00534608	0.127451	0.058922	0.073137	0.06652	5.2e-05	0.007188
FPM-scopoletin	Residential category III	0.5	THS	4	4	0.00132157	0.00534608	0.127451	0.041732	0.055654	0.046168	4.2e-05	0.006465
FPM-scopoletin	Store	2.4	Background	1	4	0.00132157	0.00534608	0.127451	0.001322	0.025556	0.009296	0.000131	0.011426
FPM-scopoletin	Store	2.4	THS	1	4	0.00132157	0.00534608	0.127451	0.041144	0.056242	0.047982	5.1e-05	0.007127
FPM-scopoletin	Restaurant	4.3	Background	1	4	0.00132157	0.00534608	0.127451	0.001322	0.005674	0.00241	4.736e-06	0.002176
FPM-scopoletin	Restaurant	4.3	Background	2	4	0.00132157	0.00534608	0.127451	0.001322	0.001322	0.001322	0	0
FPM-scopoletin	Restaurant	4.3	Background	3	4	0.00132157	0.00534608	0.127451	0.001322	0.001322	0.001322	0	0
FPM-scopoletin	Restaurant	4.3	Background	4	4	0.00132157	0.00534608	0.127451	0.001322	0.013713	0.005459	3.4e-05	0.005842
FPM-scopoletin	Restaurant	4.3	THS	1	4	0.00132157	0.00534608	0.127451	0.001322	0.001322	0.001322	0	0
FPM-scopoletin	Restaurant	4.3	THS	2	4	0.00132157	0.00534608	0.127451	0.001322	0.001322	0.001322	0	0
FPM-scopoletin	Restaurant	4.3	THS	3	4	0.00132157	0.00534608	0.127451	0.001322	0.001322	0.001322	0	0
FPM-scopoletin	Restaurant	4.3	THS	4	4	0.00132157	0.00534608	0.127451	0.001322	0.027439	0.008857	0.000157	0.012532
Glycerin	Residential category III	0.5	Background	1	4	0.0870343	3.42568	6.34691	2.82873	2.82873	2.82873	0	0
Glycerin	Residential category III	0.5	Background	2	4	0.0870343	3.42568	6.34691	2.82873	2.82873	2.82873	0	0
Glycerin	Residential category III	0.5	Background	3	4	0.0870343	3.42568	6.34691	2.82873	2.82873	2.82873	0	0
Glycerin	Residential category III	0.5	Background	4	4	0.0870343	3.42568	6.34691	3.42568	3.42568	3.42568	0	0
Glycerin	Residential category III	0.5	THS	1	4	0.0870343	3.42568	6.34691	17.4461	30.4925	22.9411	35.9695	5.99746
Glycerin	Residential category III	0.5	THS	2	4	0.0870343	3.42568	6.34691	16.6689	26.8023	21.2464	18.5903	4.31165
Glycerin	Residential category III	0.5	THS	3	3	0.0870343	3.42568	6.34691	17.4245	18.3172	17.9059	0.202938	0.450486
Glycerin	Residential category III	0.5	THS	4	4	0.0870343	3.42568	6.34691	14.3236	19.9794	17.8782	6.03654	2.45694
Glycerin	Store	2.4	Background	1	4	0.0870343	3.42568	6.34691	3.42568	3.42568	3.42568	0	0
Glycerin	Store	2.4	Background	2	4	0.0870343	3.42568	6.34691	2.92204	3.04937	2.95388	0.004053	0.063663
Glycerin	Store	2.4	Background	3	4	0.0870343	3.42568	6.34691	2.92204	2.92204	2.92204	0	0
Glycerin	Store	2.4	Background	4	4	0.0870343	3.42568	6.34691	2.92204	2.92204	2.92204	0	0
Glycerin	Store	2.4	THS	1	4	0.0870343	3.42568	6.34691	17.9363	27.3564	21.5807	16.4828	4.0599
Glycerin	Store	2.4	THS	2	4	0.0870343	3.42568	6.34691	10.1414	17.5839	12.8388	10.8744	3.29763
Glycerin	Store	2.4	THS	3	4	0.0870343	3.42568	6.34691	14.0997	16.8063	15.7151	1.33713	1.15634
Glycerin	Store	2.4	THS	4	4	0.0870343	3.42568	6.34691	9.09699	16.0788	12.3665	12.5551	3.54332
Glycerin	Restaurant	4.3	Background	1	4	0.0870343	3.42568	6.34691	2.89808	2.89808	2.89808	0	0
Glycerin	Restaurant	4.3	Background	2	4	0.0870343	3.42568	6.34691	2.89808	2.89808	2.89808	0	0
Glycerin	Restaurant	4.3	Background	3	4	0.0870343	3.42568	6.34691	2.89808	2.89808	2.89808	0	0
Glycerin	Restaurant	4.3	Background	4	4	0.0870343	3.42568	6.34691	2.89808	2.89808	2.89808	0	0
Glycerin	Restaurant	4.3	THS	1	4	0.0870343	3.42568	6.34691	11.3603	19.298	15.0906	12.2861	3.50515
Glycerin	Restaurant	4.3	THS	2	4	0.0870343	3.42568	6.34691	11.4261	16.0369	13.4343	5.27078	2.29582
Glycerin	Restaurant	4.3	THS	3	4	0.0870343	3.42568	6.34691	11.099	22.1935	16.2904	22.5327	4.74686
Glycerin	Restaurant	4.3	THS	4	4	0.0870343	3.42568	6.34691	13.8344	24.768	18.2145	23.8903	4.88777
Hydroquinone	Residential category III	0.5	Background	1	4	1.9281	19.8754	19.8754	19.3809	19.3809	19.3809	0	0
Hydroquinone	Residential category III	0.5	Background	2	4	1.9281	19.8754	19.8754	19.3809	19.3809	19.3809	0	0
Hydroquinone	Residential category III	0.5	Background	3	4	1.9281	19.8754	19.8754	19.3809	19.3809	19.3809	0	0
Hydroquinone	Residential category III	0.5	Background	4	4	1.9281	19.8754	19.8754	1.9281	1.9281	1.9281	0	0
Hydroquinone	Residential category III	0.5	THS	1	4	1.9281	19.8754	19.8754	19.3809	19.3809	19.3809	0	0
Hydroquinone	Residential category III	0.5	THS	2	4	1.9281	19.8754	19.8754	19.3809	22.5436	20.7655	1.72431	1.31313
Hydroquinone	Residential category III	0.5	THS	3	4	1.9281	19.8754	19.8754	19.3809	19.3809	19.3809	0	0
Hydroquinone	Residential category III	0.5	THS	4	4	1.9281	19.8754	19.8754	19.8754	19.8754	19.8754	0	0
Hydroquinone	Store	2.4	Background	1	4	1.9281	19.8754	19.8754	1.9281	1.9281	1.9281	0	0
Hydroquinone	Store	2.4	THS	1	4	1.9281	19.8754	19.8754	19.8754	19.8754	19.8754	0	0
Hydroquinone	Restaurant	4.3	Background	1	4	1.9281	19.8754	19.8754	1.9281	1.9281	1.9281	0	0
Hydroquinone	Restaurant	4.3	Background	2	4	1.9281	19.8754	19.8754	1.9281	1.9281	1.9281	0	0
Hydroquinone	Restaurant	4.3	Background	3	4	1.9281	19.8754	19.8754	1.9281	1.9281	1.9281	0	0
Hydroquinone	Restaurant	4.3	Background	4	4	1.9281	19.8754	19.8754	1.9281	1.9281	1.9281	0	0
Hydroquinone	Restaurant	4.3	THS	1	4	1.9281	19.8754	19.8754	19.8754	19.8754	19.8754	0	0
Hydroquinone	Restaurant	4.3	THS	2	4	1.9281	19.8754	19.8754	19.8754	19.8754	19.8754	0	0
Hydroquinone	Restaurant	4.3	THS	3	4	1.9281	19.8754	19.8754	19.8754	19.8754	19.8754	0	0
Hydroquinone	Restaurant	4.3	THS	4	4	1.9281	19.8754	19.8754	19.8754	19.8754	19.8754	0	0
Isoprene	Residential category III	0.5	Background	1	3	0.148058	0.96528	0.96528	9.30395	9.88431	9.57579	0.085213	0.291913
Isoprene	Residential category III	0.5	Background	2	3	0.148058	0.96528	0.96528	8.33642	8.44772	8.39463	0.003117	0.055829
Isoprene	Residential category III	0.5	Background	3	3	0.148058	0.96528	0.96528	9.96138	10.2552	10.0823	0.023605	0.153639
Isoprene	Residential category III	0.5	Background	4	3	0.148058	0.96528	0.96528	8.07663	8.97818	8.59215	0.215777	0.464518
Isoprene	Residential category III	0.5	THS	1	3	0.148058	0.96528	0.96528	9.53179	9.94485	9.73566	0.042676	0.206582
Isoprene	Residential category III	0.5	THS	2	3	0.148058	0.96528	0.96528	9.78693	10.5476	10.1948	0.14694	0.383327
Isoprene	Residential category III	0.5	THS	3	3	0.148058	0.96528	0.96528	11.7964	12.8276	12.3366	0.267638	0.517338
Isoprene	Residential category III	0.5	THS	4	3	0.148058	0.96528	0.96528	10.0405	10.1618	10.0872	0.004263	0.065293
Isoprene	Store	2.4	Background	1	3	0.148058	0.96528	0.96528	4.87884	4.96623	4.93109	0.002129	0.046138
Isoprene	Store	2.4	Background	2	3	0.148058	0.96528	0.96528	4.38786	4.55042	4.44249	0.008738	0.093479
Isoprene	Store	2.4	Background	3	3	0.148058	0.96528	0.96528	4.58316	4.63121	4.60844	0.000582	0.024127
Isoprene	Store	2.4	Background	4	3	0.148058	0.96528	0.96528	3.54999	4.12145	3.74342	0.1072	0.327414
Isoprene	Store	2.4	THS	1	3	0.148058	0.96528	0.96528	5.87753	6.05381	5.94878	0.008624	0.092866
Isoprene	Store	2.4	THS	2	3	0.148058	0.96528	0.96528	3.92045	4.15068	4.01067	0.015111	0.122926
Isoprene	Store	2.4	THS	3	3	0.148058	0.96528	0.96528	4.98771	5.50894	5.24474	0.067958	0.260688
Isoprene	Store	2.4	THS	4	3	0.148058	0.96528	0.96528	4.1538	4.57327	4.37012	0.044119	0.210045
Isoprene	Restaurant	4.3	Background	1	3	0.148058	0.96528	0.96528	2.12277	2.2876	2.18516	0.007994	0.08941
Isoprene	Restaurant	4.3	Background	2	3	0.148058	0.96528	0.96528	2.08914	2.38259	2.23428	0.021536	0.146751
Isoprene	Restaurant	4.3	Background	3	3	0.148058	0.96528	0.96528	2.2319	2.53412	2.41211	0.025374	0.159291
Isoprene	Restaurant	4.3	Background	4	3	0.148058	0.96528	0.96528	1.99666	2.16694	2.09604	0.007857	0.088638
Isoprene	Restaurant	4.3	THS	1	3	0.148058	0.96528	0.96528	2.17972	2.37349	2.30026	0.011065	0.10519
Isoprene	Restaurant	4.3	THS	2	3	0.148058	0.96528	0.96528	2.17825	2.55815	2.41921	0.043888	0.209495
Isoprene	Restaurant	4.3	THS	3	3	0.148058	0.96528	0.96528	2.66531	2.93985	2.78116	0.02022	0.142196
Isoprene	Restaurant	4.3	THS	4	3	0.148058	0.96528	0.96528	2.33921	2.48284	2.43114	0.006372	0.079825
Nicotine	Residential category III	0.5	Background	1	4	0.0720874	0.248894	0.248894	0.399272	0.446521	0.425627	0.000512	0.022625
Nicotine	Residential category III	0.5	Background	2	4	0.0720874	0.248894	0.248894	0.28754	0.32233	0.302933	0.000208	0.014426
Nicotine	Residential category III	0.5	Background	3	4	0.0720874	0.248894	0.248894	0.275324	0.302346	0.290817	0.000136	0.011669
Nicotine	Residential category III	0.5	Background	4	4	0.0720874	0.248894	0.248894	0.248894	0.248894	0.248894	0	0
Nicotine	Residential category III	0.5	THS	1	4	0.0720874	0.248894	0.248894	1.30736	1.75971	1.4857	0.03788	0.194629
Nicotine	Residential category III	0.5	THS	2	4	0.0720874	0.248894	0.248894	1.31642	1.38552	1.35904	0.001104	0.033233
Nicotine	Residential category III	0.5	THS	3	4	0.0720874	0.248894	0.248894	0.837379	0.937379	0.887743	0.002606	0.051053
Nicotine	Residential category III	0.5	THS	4	4	0.0720874	0.248894	0.248894	0.495227	0.687055	0.632605	0.008449	0.091918
Nicotine	Store	2.4	Background	1	4	0.0720874	0.248894	0.248894	0.248894	0.248894	0.248894	0	0
Nicotine	Store	2.4	Background	2	4	0.0720874	0.248894	0.248894	0.243396	0.243396	0.243396	0	0
Nicotine	Store	2.4	Background	3	4	0.0720874	0.248894	0.248894	0.243396	0.243396	0.243396	0	0
Nicotine	Store	2.4	Background	4	4	0.0720874	0.248894	0.248894	0.243396	0.243396	0.243396	0	0
Nicotine	Store	2.4	THS	1	4	0.0720874	0.248894	0.248894	1.95817	2.31691	2.19539	0.027323	0.165298
Nicotine	Store	2.4	THS	2	4	0.0720874	0.248894	0.248894	0.457524	0.666424	0.55	0.008635	0.092926
Nicotine	Store	2.4	THS	3	4	0.0720874	0.248894	0.248894	0.683333	0.917233	0.791768	0.010487	0.102408
Nicotine	Store	2.4	THS	4	4	0.0720874	0.248894	0.248894	0.566505	0.715858	0.63574	0.004412	0.066426
Nicotine	Restaurant	4.3	Background	1	4	0.0720874	0.248894	0.248894	0.248894	0.248894	0.248894	0	0
Nicotine	Restaurant	4.3	Background	2	4	0.0720874	0.248894	0.248894	0.248894	0.248894	0.248894	0	0
Nicotine	Restaurant	4.3	Background	3	4	0.0720874	0.248894	0.248894	0.248894	0.248894	0.248894	0	0
Nicotine	Restaurant	4.3	Background	4	3	0.0720874	0.248894	0.248894	0.248894	0.248894	0.248894	0	0
Nicotine	Restaurant	4.3	THS	1	4	0.0720874	0.248894	0.248894	0.747573	1.125	0.900101	0.025577	0.159928
Nicotine	Restaurant	4.3	THS	2	4	0.0720874	0.248894	0.248894	0.935356	1.15671	1.04666	0.009831	0.099152
Nicotine	Restaurant	4.3	THS	3	4	0.0720874	0.248894	0.248894	1.48026	1.65979	1.57108	0.005824	0.076318
Nicotine	Restaurant	4.3	THS	4	4	0.0720874	0.248894	0.248894	1.61197	2.33697	1.90449	0.095202	0.308548
NNK	Residential category III	0.5	Background	1	3	2.65693e-05	0.000108426	0.000704221	2.7e-05	2.7e-05	2.7e-05	0	0
NNK	Residential category III	0.5	Background	2	3	2.65693e-05	0.000108426	0.000704221	2.7e-05	2.7e-05	2.7e-05	0	0
NNK	Residential category III	0.5	Background	3	3	2.65693e-05	0.000108426	0.000704221	2.7e-05	2.7e-05	2.7e-05	0	0
NNK	Residential category III	0.5	Background	4	3	2.65693e-05	0.000108426	0.000704221	2.7e-05	2.7e-05	2.7e-05	0	0
NNK	Residential category III	0.5	THS	1	3	2.65693e-05	0.000108426	0.000704221	2.7e-05	2.7e-05	2.7e-05	0	0
NNK	Residential category III	0.5	THS	2	3	2.65693e-05	0.000108426	0.000704221	2.7e-05	0.000108	5.4e-05	2.234e-09	4.7e-05
NNK	Residential category III	0.5	THS	3	3	2.65693e-05	0.000108426	0.000704221	2.7e-05	0.000108	5.4e-05	2.234e-09	4.7e-05
NNK	Residential category III	0.5	THS	4	3	2.65693e-05	0.000108426	0.000704221	2.7e-05	2.7e-05	2.7e-05	0	0
NNK	Store	2.4	Background	1	3	2.65693e-05	0.000108426	0.000704221	2.7e-05	2.7e-05	2.7e-05	0	0
NNK	Store	2.4	THS	1	3	2.65693e-05	0.000108426	0.000704221	2.7e-05	2.7e-05	2.7e-05	0	0
NNK	Restaurant	4.3	Background	1	3	2.65693e-05	0.000108426	0.000704221	0.000108	0.000134	0.000117	2.22e-10	1.5e-05
NNK	Restaurant	4.3	Background	2	3	2.65693e-05	0.000108426	0.000704221	2.7e-05	0.000108	8.1e-05	2.234e-09	4.7e-05
NNK	Restaurant	4.3	Background	3	3	2.65693e-05	0.000108426	0.000704221	2.7e-05	0.000108	8.1e-05	2.234e-09	4.7e-05
NNK	Restaurant	4.3	Background	4	3	2.65693e-05	0.000108426	0.000704221	2.7e-05	0.00161	0.000841	6.286e-07	0.000793
NNK	Restaurant	4.3	THS	1	3	2.65693e-05	0.000108426	0.000704221	0.000108	0.001126	0.000448	3.452e-07	0.000588
NNK	Restaurant	4.3	THS	2	3	2.65693e-05	0.000108426	0.000704221	2.7e-05	0.000108	5.4e-05	2.234e-09	4.7e-05
NNK	Restaurant	4.3	THS	3	3	2.65693e-05	0.000108426	0.000704221	0.000113	0.000603	0.00034	6.101e-08	0.000247
NNK	Restaurant	4.3	THS	4	3	2.65693e-05	0.000108426	0.000704221	0.000108	0.000108	0.000108	0	0
NNN	Residential category III	0.5	Background	1	3	2.11039e-05	0.000108104	0.00062776	2.1e-05	2.1e-05	2.1e-05	0	0
NNN	Residential category III	0.5	Background	2	3	2.11039e-05	0.000108104	0.00062776	2.1e-05	2.1e-05	2.1e-05	0	0
NNN	Residential category III	0.5	Background	3	3	2.11039e-05	0.000108104	0.00062776	2.1e-05	2.1e-05	2.1e-05	0	0
NNN	Residential category III	0.5	Background	4	3	2.11039e-05	0.000108104	0.00062776	2.1e-05	2.1e-05	2.1e-05	0	0
NNN	Residential category III	0.5	THS	1	3	2.11039e-05	0.000108104	0.00062776	0.000108	0.000108	0.000108	0	0
NNN	Residential category III	0.5	THS	2	3	2.11039e-05	0.000108104	0.00062776	0.000108	0.000108	0.000108	0	0
NNN	Residential category III	0.5	THS	3	3	2.11039e-05	0.000108104	0.00062776	0.000108	0.000108	0.000108	0	0
NNN	Residential category III	0.5	THS	4	3	2.11039e-05	0.000108104	0.00062776	0.000108	0.000108	0.000108	0	0
NNN	Store	2.4	Background	1	3	2.11039e-05	0.000108104	0.00062776	2.1e-05	2.1e-05	2.1e-05	0	0
NNN	Store	2.4	THS	1	3	2.11039e-05	0.000108104	0.00062776	0.000108	0.000108	0.000108	0	0
NNN	Restaurant	4.3	Background	1	3	2.11039e-05	0.000108104	0.00062776	2.1e-05	2.1e-05	2.1e-05	0	0
NNN	Restaurant	4.3	Background	2	3	2.11039e-05	0.000108104	0.00062776	2.1e-05	2.1e-05	2.1e-05	0	0
NNN	Restaurant	4.3	Background	3	3	2.11039e-05	0.000108104	0.00062776	2.1e-05	2.1e-05	2.1e-05	0	0
NNN	Restaurant	4.3	Background	4	3	2.11039e-05	0.000108104	0.00062776	2.1e-05	0.000108	7.9e-05	2.523e-09	5e-05
NNN	Restaurant	4.3	THS	1	3	2.11039e-05	0.000108104	0.00062776	2.1e-05	0.000108	5e-05	2.523e-09	5e-05
NNN	Restaurant	4.3	THS	2	3	2.11039e-05	0.000108104	0.00062776	2.1e-05	2.1e-05	2.1e-05	0	0
NNN	Restaurant	4.3	THS	3	3	2.11039e-05	0.000108104	0.00062776	2.1e-05	0.000108	7.9e-05	2.523e-09	5e-05
NNN	Restaurant	4.3	THS	4	3	2.11039e-05	0.000108104	0.00062776	2.1e-05	0.000108	7.9e-05	2.523e-09	5e-05
PM1	Residential category III	0.5	Background	1	2	5	15	#N/A	5	5	5	0	0
PM1	Residential category III	0.5	Background	2	2	5	15	#N/A	5	5	5	0	0
PM1	Residential category III	0.5	Background	3	2	5	15	#N/A	5	5	5	0	0
PM1	Residential category III	0.5	Background	4	2	5	15	#N/A	5	5	5	0	0
PM1	Residential category III	0.5	THS	1	2	5	15	#N/A	15	15	15	0	0
PM1	Residential category III	0.5	THS	2	2	5	15	#N/A	15	15	15	0	0
PM1	Residential category III	0.5	THS	3	2	5	15	#N/A	15	15	15	0	0
PM1	Residential category III	0.5	THS	4	2	5	15	#N/A	5	5	5	0	0
PM1	Store	2.4	Background	1	2	5	15	#N/A	5	5	5	0	0
PM1	Store	2.4	Background	2	2	5	15	#N/A	5	5	5	0	0
PM1	Store	2.4	Background	3	2	5	15	#N/A	5	5	5	0	0
PM1	Store	2.4	Background	4	2	5	15	#N/A	5	5	5	0	0
PM1	Store	2.4	THS	1	2	5	15	#N/A	15	15	15	0	0
PM1	Store	2.4	THS	2	2	5	15	#N/A	5	5	5	0	0
PM1	Store	2.4	THS	3	2	5	15	#N/A	5	5	5	0	0
PM1	Store	2.4	THS	4	2	5	15	#N/A	5	5	5	0	0
PM1	Restaurant	4.3	Background	1	2	5	15	#N/A	5	5	5	0	0
PM1	Restaurant	4.3	Background	2	2	5	15	#N/A	5	5	5	0	0
PM1	Restaurant	4.3	Background	3	2	5	15	#N/A	5	5	5	0	0
PM1	Restaurant	4.3	Background	4	2	5	15	#N/A	5	5	5	0	0
PM1	Restaurant	4.3	THS	1	2	5	15	#N/A	5	5	5	0	0
PM1	Restaurant	4.3	THS	2	2	5	15	#N/A	5	5	5	0	0
PM1	Restaurant	4.3	THS	3	2	5	15	#N/A	5	5	5	0	0
PM1	Restaurant	4.3	THS	4	2	5	15	#N/A	5	5	5	0	0
PM2.5	Residential category III	0.5	Background	1	2	5	15	#N/A	5	5	5	0	0
PM2.5	Residential category III	0.5	Background	2	2	5	15	#N/A	5	5	5	0	0
PM2.5	Residential category III	0.5	Background	3	2	5	15	#N/A	5	5	5	0	0
PM2.5	Residential category III	0.5	Background	4	2	5	15	#N/A	5	5	5	0	0
PM2.5	Residential category III	0.5	THS	1	2	5	15	#N/A	15	15	15	0	0
PM2.5	Residential category III	0.5	THS	2	2	5	15	#N/A	15	15	15	0	0
PM2.5	Residential category III	0.5	THS	3	2	5	15	#N/A	15	15	15	0	0
PM2.5	Residential category III	0.5	THS	4	2	5	15	#N/A	5	5	5	0	0
PM2.5	Store	2.4	Background	1	2	5	15	#N/A	5	5	5	0	0
PM2.5	Store	2.4	Background	2	2	5	15	#N/A	5	5	5	0	0
PM2.5	Store	2.4	Background	3	2	5	15	#N/A	5	5	5	0	0
PM2.5	Store	2.4	Background	4	2	5	15	#N/A	5	5	5	0	0
PM2.5	Store	2.4	THS	1	2	5	15	#N/A	15	15	15	0	0
PM2.5	Store	2.4	THS	2	2	5	15	#N/A	5	5	5	0	0
PM2.5	Store	2.4	THS	3	2	5	15	#N/A	5	5	5	0	0
PM2.5	Store	2.4	THS	4	2	5	15	#N/A	5	5	5	0	0
PM2.5	Restaurant	4.3	Background	1	2	5	15	#N/A	5	5	5	0	0
PM2.5	Restaurant	4.3	Background	2	2	5	15	#N/A	5	5	5	0	0
PM2.5	Restaurant	4.3	Background	3	2	5	15	#N/A	5	5	5	0	0
PM2.5	Restaurant	4.3	Background	4	2	5	15	#N/A	5	5	5	0	0
PM2.5	Restaurant	4.3	THS	1	2	5	15	#N/A	5	5	5	0	0
PM2.5	Restaurant	4.3	THS	2	2	5	15	#N/A	5	5	5	0	0
PM2.5	Restaurant	4.3	THS	3	2	5	15	#N/A	5	5	5	0	0
PM2.5	Restaurant	4.3	THS	4	2	5	15	#N/A	5	5	5	0	0
Propylene glycol	Residential category III	0.5	Background	1	4	0.484999	15.7089	29.1805	14.8142	14.8142	14.8142	0	0
Propylene glycol	Residential category III	0.5	Background	2	4	0.484999	15.7089	29.1805	51.7214	57.3712	54.5686	7.33397	2.70813
Propylene glycol	Residential category III	0.5	Background	3	4	0.484999	15.7089	29.1805	24.3072	26.8809	25.3213	1.53652	1.23957
Propylene glycol	Residential category III	0.5	Background	4	4	0.484999	15.7089	29.1805	15.7089	15.7089	15.7089	0	0
Propylene glycol	Residential category III	0.5	THS	1	4	0.484999	15.7089	29.1805	14.8142	15.2926	14.9338	0.057202	0.23917
Propylene glycol	Residential category III	0.5	THS	2	4	0.484999	15.7089	29.1805	82.8528	97.208	92.641	43.9071	6.62624
Propylene glycol	Residential category III	0.5	THS	3	3	0.484999	15.7089	29.1805	28.9852	30.5341	29.6714	0.623123	0.789381
Propylene glycol	Residential category III	0.5	THS	4	4	0.484999	15.7089	29.1805	15.7089	15.7089	15.7089	0	0
Propylene glycol	Store	2.4	Background	1	4	0.484999	15.7089	29.1805	15.7089	15.7089	15.7089	0	0
Propylene glycol	Store	2.4	Background	2	4	0.484999	15.7089	29.1805	15.6763	15.6763	15.6763	0	0
Propylene glycol	Store	2.4	Background	3	4	0.484999	15.7089	29.1805	15.6763	15.6763	15.6763	0	0
Propylene glycol	Store	2.4	Background	4	4	0.484999	15.7089	29.1805	15.6763	15.6763	15.6763	0	0
Propylene glycol	Store	2.4	THS	1	4	0.484999	15.7089	29.1805	15.7089	15.7089	15.7089	0	0
Propylene glycol	Store	2.4	THS	2	4	0.484999	15.7089	29.1805	15.6763	15.6763	15.6763	0	0
Propylene glycol	Store	2.4	THS	3	4	0.484999	15.7089	29.1805	15.6763	15.6763	15.6763	0	0
Propylene glycol	Store	2.4	THS	4	4	0.484999	15.7089	29.1805	15.6763	15.6763	15.6763	0	0
Propylene glycol	Restaurant	4.3	Background	1	4	0.484999	15.7089	29.1805	0.484999	0.484999	0.484999	0	0
Propylene glycol	Restaurant	4.3	Background	2	4	0.484999	15.7089	29.1805	15.5446	15.5446	15.5446	0	0
Propylene glycol	Restaurant	4.3	Background	3	4	0.484999	15.7089	29.1805	15.5446	15.5446	15.5446	0	0
Propylene glycol	Restaurant	4.3	Background	4	4	0.484999	15.7089	29.1805	0.484999	0.484999	0.484999	0	0
Propylene glycol	Restaurant	4.3	THS	1	4	0.484999	15.7089	29.1805	0.484999	0.484999	0.484999	0	0
Propylene glycol	Restaurant	4.3	THS	2	4	0.484999	15.7089	29.1805	15.5446	15.5446	15.5446	0	0
Propylene glycol	Restaurant	4.3	THS	3	4	0.484999	15.7089	29.1805	15.5446	15.5446	15.5446	0	0
Propylene glycol	Restaurant	4.3	THS	4	4	0.484999	15.7089	29.1805	15.5446	15.5446	15.5446	0	0
Solanesol	Residential category III	0.5	Background	1	4	0.0147157	0.654275	0.920203	0.014716	0.014716	0.014716	0	0
Solanesol	Residential category III	0.5	Background	2	4	0.0147157	0.654275	0.920203	0.014716	0.014716	0.014716	0	0
Solanesol	Residential category III	0.5	Background	3	4	0.0147157	0.654275	0.920203	0.014716	0.014716	0.014716	0	0
Solanesol	Residential category III	0.5	Background	4	4	0.0147157	0.654275	0.920203	0.014716	0.014716	0.014716	0	0
Solanesol	Residential category III	0.5	THS	1	4	0.0147157	0.654275	0.920203	0.850196	0.888922	0.867083	0.000295	0.017179
Solanesol	Residential category III	0.5	THS	2	4	0.0147157	0.654275	0.920203	0.679706	0.776176	0.71777	0.001705	0.041296
Solanesol	Residential category III	0.5	THS	3	4	0.0147157	0.654275	0.920203	0.700784	0.731961	0.71674	0.000216	0.014691
Solanesol	Residential category III	0.5	THS	4	4	0.0147157	0.654275	0.920203	0.653922	0.653922	0.653922	0	0
Solanesol	Store	2.4	Background	1	4	0.0147157	0.654275	0.920203	0.014716	0.014716	0.014716	0	0
Solanesol	Store	2.4	THS	1	4	0.0147157	0.654275	0.920203	0.653922	0.653922	0.653922	0	0
Solanesol	Restaurant	4.3	Background	1	4	0.0147157	0.654275	0.920203	0.014716	0.014716	0.014716	0	0
Solanesol	Restaurant	4.3	Background	2	4	0.0147157	0.654275	0.920203	0.014716	0.014716	0.014716	0	0
Solanesol	Restaurant	4.3	Background	3	4	0.0147157	0.654275	0.920203	0.014716	0.014716	0.014716	0	0
Solanesol	Restaurant	4.3	Background	4	4	0.0147157	0.654275	0.920203	0.014716	0.014716	0.014716	0	0
Solanesol	Restaurant	4.3	THS	1	4	0.0147157	0.654275	0.920203	0.654275	0.654275	0.654275	0	0
Solanesol	Restaurant	4.3	THS	2	4	0.0147157	0.654275	0.920203	0.654275	0.654275	0.654275	0	0
Solanesol	Restaurant	4.3	THS	3	4	0.0147157	0.654275	0.920203	0.654275	0.654275	0.654275	0	0
Solanesol	Restaurant	4.3	THS	4	4	0.0147157	0.654275	0.920203	0.654275	0.654275	0.654275	0	0
Toluene	Residential category III	0.5	Background	1	3	0.076699	0.363633	1.50485	1.17618	1.32948	1.26713	0.006489	0.080552
Toluene	Residential category III	0.5	Background	2	3	0.076699	0.363633	1.50485	1.00526	1.06703	1.03115	0.001029	0.032074
Toluene	Residential category III	0.5	Background	3	3	0.076699	0.363633	1.50485	1.33662	1.35276	1.34669	7.7e-05	0.008782
Toluene	Residential category III	0.5	Background	4	3	0.076699	0.363633	1.50485	0.754142	0.85578	0.803261	0.002591	0.050904
Toluene	Residential category III	0.5	THS	1	3	0.076699	0.363633	1.50485	1.17526	1.23044	1.20851	0.000857	0.029283
Toluene	Residential category III	0.5	THS	2	3	0.076699	0.363633	1.50485	0.882044	1.01473	0.950009	0.004409	0.066402
Toluene	Residential category III	0.5	THS	3	3	0.076699	0.363633	1.50485	1.08848	1.22337	1.13807	0.005506	0.0742
Toluene	Residential category III	0.5	THS	4	3	0.076699	0.363633	1.50485	0.785917	0.849649	0.824116	0.001136	0.033701
Toluene	Store	2.4	Background	1	3	0.076699	0.363633	1.50485	0.577251	0.618549	0.596956	0.000429	0.020714
Toluene	Store	2.4	Background	2	3	0.076699	0.363633	1.50485	1.4462	1.48273	1.45992	0.000396	0.01989
Toluene	Store	2.4	Background	3	3	0.076699	0.363633	1.50485	1.42541	1.45073	1.43669	0.000166	0.012883
Toluene	Store	2.4	Background	4	3	0.076699	0.363633	1.50485	1.42032	1.75711	1.55332	0.032115	0.179206
Toluene	Store	2.4	THS	1	3	0.076699	0.363633	1.50485	0.457338	0.48405	0.475103	0.000237	0.015385
Toluene	Store	2.4	THS	2	3	0.076699	0.363633	1.50485	0.849666	0.903217	0.874234	0.000732	0.027047
Toluene	Store	2.4	THS	3	3	0.076699	0.363633	1.50485	1.65646	1.823	1.76215	0.008442	0.091881
Toluene	Store	2.4	THS	4	3	0.076699	0.363633	1.50485	1.32897	1.5196	1.42925	0.009159	0.095704
Toluene	Restaurant	4.3	Background	1	3	0.076699	0.363633	1.50485	0.451558	0.523034	0.493241	0.001383	0.037192
Toluene	Restaurant	4.3	Background	2	3	0.076699	0.363633	1.50485	0.794325	0.928153	0.845159	0.005253	0.072479
Toluene	Restaurant	4.3	Background	3	3	0.076699	0.363633	1.50485	0.623235	0.817101	0.747372	0.011616	0.107778
Toluene	Restaurant	4.3	Background	4	3	0.076699	0.363633	1.50485	0.749736	0.811464	0.78439	0.000996	0.031555
Toluene	Restaurant	4.3	THS	1	3	0.076699	0.363633	1.50485	0.400193	0.484667	0.446503	0.001834	0.042822
Toluene	Restaurant	4.3	THS	2	3	0.076699	0.363633	1.50485	0.836823	0.961823	0.915045	0.004648	0.068175
Toluene	Restaurant	4.3	THS	3	3	0.076699	0.363633	1.50485	0.709032	0.810058	0.757555	0.002563	0.050631
Toluene	Restaurant	4.3	THS	4	3	0.076699	0.363633	1.50485	0.669345	0.693713	0.682909	0.000154	0.012416
TVOC	Residential category III	0.5	Background	1	4	#N/A	2	#N/A	22.1041	26.0125	23.5046	3.38899	1.84092
TVOC	Residential category III	0.5	Background	2	4	#N/A	2	#N/A	54.7931	57.3025	55.9911	1.52747	1.23591
TVOC	Residential category III	0.5	Background	3	4	#N/A	2	#N/A	41.1682	41.8907	41.4921	0.103403	0.321563
TVOC	Residential category III	0.5	Background	4	4	#N/A	2	#N/A	19.9031	20.3978	20.1259	0.043269	0.208011
TVOC	Residential category III	0.5	THS	1	4	#N/A	2	#N/A	34.4299	35.4408	34.7621	0.214461	0.463099
TVOC	Residential category III	0.5	THS	2	4	#N/A	2	#N/A	85.633	91.3472	87.7893	6.09952	2.46972
TVOC	Residential category III	0.5	THS	3	4	#N/A	2	#N/A	60.1182	61.5358	60.6205	0.418777	0.64713
TVOC	Residential category III	0.5	THS	4	4	#N/A	2	#N/A	46.5765	49.4449	47.945	1.98226	1.40793
TVOC	Store	2.4	Background	1	4	#N/A	2	#N/A	6.35832	6.39163	6.37221	0.000213	0.014594
TVOC	Store	2.4	Background	2	4	#N/A	2	#N/A	3.91786	7.72623	5.56007	3.51844	1.87575
TVOC	Store	2.4	Background	3	4	#N/A	2	#N/A	3.86407	4.0732	4.00725	0.009401	0.096959
TVOC	Store	2.4	Background	4	4	#N/A	2	#N/A	3.7445	3.78151	3.76321	0.000284	0.016853
TVOC	Store	2.4	THS	1	4	#N/A	2	#N/A	12.0304	12.8417	12.3464	0.140125	0.374333
TVOC	Store	2.4	THS	2	4	#N/A	2	#N/A	17.2849	18.8004	17.8654	0.516339	0.718567
TVOC	Store	2.4	THS	3	4	#N/A	2	#N/A	14.3581	15.9706	15.4254	0.524309	0.724092
TVOC	Store	2.4	THS	4	4	#N/A	2	#N/A	9.77923	10.2144	9.90925	0.042205	0.205439
TVOC	Restaurant	4.3	Background	1	4	#N/A	2	#N/A	2	2	2	0	0
TVOC	Restaurant	4.3	Background	2	4	#N/A	2	#N/A	2.07121	2.27385	2.17308	0.008636	0.092928
TVOC	Restaurant	4.3	Background	3	4	#N/A	2	#N/A	2.11457	2.24118	2.17043	0.003958	0.062909
TVOC	Restaurant	4.3	Background	4	4	#N/A	2	#N/A	5.39964	6.94005	6.14353	0.503802	0.70979
TVOC	Restaurant	4.3	THS	1	4	#N/A	2	#N/A	5.90804	6.28503	6.10521	0.025546	0.159833
TVOC	Restaurant	4.3	THS	2	4	#N/A	2	#N/A	7.10895	9.7321	8.72152	1.27833	1.13063
TVOC	Restaurant	4.3	THS	3	4	#N/A	2	#N/A	2.26505	2.28509	2.27489	7.2e-05	0.008484
TVOC	Restaurant	4.3	THS	4	4	#N/A	2	#N/A	11.4922	12.0789	11.829	0.073284	0.27071
UVPM-THBP	Store	2.4	Background	1	4	0.0415784	0.137157	1.55882	0.181765	0.455	0.264534	0.016373	0.127958
UVPM-THBP	Store	2.4	THS	1	4	0.0415784	0.137157	1.55882	0.557451	0.788137	0.656765	0.011948	0.109309
UVPM-THBP	Residential category III	0.5	Background	1	4	0.0415784	0.137157	1.55882	0.137157	0.201078	0.158799	0.000908	0.03014
UVPM-THBP	Residential category III	0.5	Background	2	4	0.0415784	0.137157	1.55882	0.137157	0.137745	0.137304	8.651e-08	0.000294
UVPM-THBP	Residential category III	0.5	Background	3	4	0.0415784	0.137157	1.55882	0.137157	0.137157	0.137157	0	0
UVPM-THBP	Residential category III	0.5	Background	4	4	0.0415784	0.137157	1.55882	0.185882	0.479902	0.275025	0.018886	0.137428
UVPM-THBP	Residential category III	0.5	THS	1	4	0.0415784	0.137157	1.55882	0.692059	0.756961	0.734191	0.000864	0.029386
UVPM-THBP	Residential category III	0.5	THS	2	4	0.0415784	0.137157	1.55882	0.556667	0.768824	0.680123	0.008281	0.091001
UVPM-THBP	Residential category III	0.5	THS	3	4	0.0415784	0.137157	1.55882	0.550588	0.646078	0.594534	0.001815	0.042601
UVPM-THBP	Residential category III	0.5	THS	4	4	0.0415784	0.137157	1.55882	0.572157	0.741373	0.650172	0.004902	0.070011
UVPM-THBP	Restaurant	4.3	Background	1	4	0.0415784	0.137157	1.55882	0.137157	0.316275	0.198039	0.007026	0.083822
UVPM-THBP	Restaurant	4.3	Background	2	3	0.0415784	0.137157	1.55882	0.207745	0.270882	0.249673	0.001319	0.036312
UVPM-THBP	Restaurant	4.3	Background	3	4	0.0415784	0.137157	1.55882	0.148039	0.173039	0.162426	0.000128	0.011327
UVPM-THBP	Restaurant	4.3	Background	4	4	0.0415784	0.137157	1.55882	0.182745	0.330098	0.227843	0.004719	0.068694
UVPM-THBP	Restaurant	4.3	THS	1	4	0.0415784	0.137157	1.55882	0.259314	0.406569	0.342892	0.004761	0.069
UVPM-THBP	Restaurant	4.3	THS	2	4	0.0415784	0.137157	1.55882	0.282255	0.421961	0.362843	0.003409	0.058385
UVPM-THBP	Restaurant	4.3	THS	3	4	0.0415784	0.137157	1.55882	0.31549	0.389804	0.346005	0.001109	0.033307
UVPM-THBP	Restaurant	4.3	THS	4	4	0.0415784	0.137157	1.55882	0.363627	0.51549	0.417206	0.004595	0.067789

## Sheet: Input
		ACH
	Residential category III	0.5
	Store	2.4
	Restaurant	4.3
		LOD	LLOQ	LWRL
	PM1	5	15	#N/A
	PM2.5	5	15	#N/A
	Acetaldehyde	0.0270191	0.420266	3.61266
	Acrolein	0.00273227	0.0596784	0.283346
	Crotonaldehyde	0.0030686	0.0677961	0.40075
	Formaldehyde	0.0295489	0.311574	8.82421
	Glycerin	0.0870343	3.42568	6.34691
	Propylene glycol	0.484999	15.7089	29.1805
	3-Ethenylpyridine	0.0232201	0.0987917	0.469256
	Nicotine	0.0720874	0.248894	0.248894
	Cathehol	2.02614	10.2287	10.2287
	Hydroquinone	1.9281	19.8754	19.8754
	FPM-scopoletin	0.00132157	0.00534608	0.127451
	Solanesol	0.0147157	0.654275	0.920203
	UVPM-THBP	0.0415784	0.137157	1.55882
	NNK	2.65693e-05	0.000108426	0.000704221
	NNN	2.11039e-05	0.000108104	0.00062776
	1,3-Butadiene	0.673544	2.85732	2.85732
	Acrylonitrile	0.137136	0.724261	0.724261
	Benzene	0.0240291	0.0901569	0.339806
	Isoprene	0.148058	0.96528	0.96528
	Toluene	0.076699	0.363633	1.50485
	TVOC	#N/A	2	#N/A
