# Supplementary material for: Comprehensive Air Quality Assessment of the Tobacco Heating System 2.2 under Simulated Indoor Environments
Source: MDPI journal article supplement (doi:10.3390/atmos12080989), 2021-07-31
Supplement: s1 [file s1 › Supplementary Table S3.xlsx]

## Sheet: Table S3
Table S3: Brands of tobacco sticks consumed during the study
Panelist	Week	Day	Amber	Bronze	Sienna	Turquoise	Yellow	Total sticks /panelist
Panelist 1	Week 1	28.01.2020			2	2		4
Panelist 1	Week 1	29.01.2020			4			4
Panelist 1	Week 1	30.01.2021				4		4
Panelist 1	Week 2	17.02.2020		2		2		4
Panelist 1	Week 2	18.02.2020			4			4
Panelist 1	Week 2	19.02.2020			4			4
Panelist 1	Week 2	20.02.2020		2	2			4
Panelist 1	Week 3	09.03.2020				4		4
Panelist 1	Week 3	10.03.2020		2		2		4
Panelist 1	Week 3	23.06.2020			2	2		4
Panelist 1	Week 3	24.06.2020		4				4
Panelist 1	Week 3	25.06.2020				4		4
Panelist 2	Week 1	28.01.2020	4					4
Panelist 2	Week 1	29.01.2020		2		2		4
Panelist 2	Week 1	30.01.2021			1	3		4
Panelist 2	Week 2	17.02.2020	2				2	4
Panelist 2	Week 2	18.02.2020			2	2		4
Panelist 2	Week 2	19.02.2020	2		2			4
Panelist 2	Week 2	20.02.2020			4			4
Panelist 2	Week 3	09.03.2020			2	2		4
Panelist 2	Week 3	10.03.2020		1	2	1		4
Panelist 2	Week 3	23.06.2020				4		4
Panelist 2	Week 3	24.06.2020			4			4
Panelist 2	Week 3	25.06.2020			4			4
Panelist 3	Week 1	28.01.2020			4			4
Panelist 3	Week 1	29.01.2020			2	2		4
Panelist 3	Week 1	30.01.2021			2	2		4
Panelist 3	Week 2	17.02.2020			2	2		4
Panelist 3	Week 2	18.02.2020		2		2		4
Panelist 3	Week 2	19.02.2020			2	2		4
Panelist 3	Week 2	20.02.2020				4		4
Panelist 3	Week 3	09.03.2020				4		4
Panelist 3	Week 3	10.03.2020		3	1			4
Panelist 3	Week 3	23.06.2020			2	2		4
Panelist 3	Week 3	24.06.2020			2	2		4
Panelist 3	Week 3	25.06.2020			4			4
Total sticks per brand			8	18	60	56	2	144
%			5.55556	12.5	41.6667	38.8889	1.38889	100
