# Supplementary material for: Comprehensive Air Quality Assessment of the Tobacco Heating System 2.2 under Simulated Indoor Environments
Source: MDPI journal article supplement (doi:10.3390/atmos12080989), 2021-07-31
Supplement: s1 [file s1 › Supplementary Table S4.xlsx]

## Sheet: Table S4
	Table S4: Panelist profiles
	Code	Gender	Age	Profile	BMI
	Volonteer 1	Female	53	DUAL	38.9468
	Volonteer 2	Female	59	DUAL	25.4028
	Volonteer 3	Female	49	DUAL	28.4799
	Volonteer 4	Male	32	DUAL	25.8478
	Volonteer 5	Male	44	DUAL	19.047
	Volonteer 6	Female	64	DUAL	29.3848
	Volonteer 7	Male	31	DUAL	25.565
	Volonteer 8	Female	52	IQOS	26.2188
	Volonteer 9	Female	61	DUAL	30.1021
	Volonteer 10	Female	28	DUAL	27.3437
	Volonteer 11	Female	24	DUAL	26.8136
	Volonteer 12	Male	60	DUAL	29.668
	Volonteer 13	Female	62	IQOS	24.0346
	Volonteer 14	Male	26	DUAL	20.1562
