# Supplementary material for: Comprehensive Air Quality Assessment of the Tobacco Heating System 2.2 under Simulated Indoor Environments
Source: MDPI journal article supplement (doi:10.3390/atmos12080989), 2021-07-31
Supplement: s1 [file s1 › Supplementary Table S5.xlsx]

## Sheet: Table S5
Table S5: Summary of distances (m) between each panelist and the different sampling positions
	2020-01-28	2020-01-29	2020-01-30	2020-02-17	2020-02-18	2020-02-19	2020-02-20	2020-06-23	2020-06-24	2020-06-25	Min	Max
Panelist 1 to DustTrak and UFP window	1.27	1.24	1.25	1.3	1.22	1.23	1.24	1.31	1.29	1.28	1.22	1.31
Panelist 1 to DustTrak and UFP door	1.47	1.55	1.54	1.53	1.55	1.54	1.48	1.49	1.5	1.52	1.47	1.55
Panelist 1 to gas sensors	1.29	1.3	1.28	1.29	1.24	1.38	1.39	1.32	1.33	1.34	1.24	1.39
Panelist 1 to collection panel window side	1.2	1.15	1.19	1.19	1.2	1.1	1.08	1.18	1.15	1.16	1.08	1.2
Panelist 1 to collection panel middle	1.27	1.1	1.15	1.16	1.18	1.14	0.98	1.13	1.12	1.11	0.98	1.27
Panelist 1 to collection panel door side	1.75	1.6	1.62	1.65	1.7	1.68	1.1	1.2	1.11	1.2	1.1	1.75
Panelist 1 to collection panel TVOC (middle)	1.9	1.7	1.8	1.75	1.85	1.75	1.8	1.83	1.8	1.81	1.7	1.9
Panelist 2 to DustTrak and UFP window	1.27	1.17	1.2	1.18	1.25	1.29	1.19	1.23	1.22	1.21	1.17	1.29
Panelist 2 to DustTrak and UFP door	1.28	1.14	1.15	1.16	1.19	1.17	1.09	1.15	1.14	1.13	1.09	1.28
Panelist 2 to gas sensors	1.32	1.31	1.3	1.31	1.29	1.32	1.34	1.33	1.32	1.3	1.29	1.34
Panelist 2 to collection panel window side	1.56	1.55	1.54	1.53	1.49	1.48	1.5	1.54	1.55	1.53	1.48	1.56
Panelist 2 to collection panel middle	1.35	1.2	1.25	1.26	1.3	1.27	1.22	1.19	1.18	1.17	1.17	1.35
Panelist 2 to collection panel door side	1.17	1.18	1.19	1.16	1.55	1.2	1.24	1.3	1.28	1.29	1.16	1.55
Panelist 2 to collection panel TVOC (middle)	1.24	1.22	1.23	1.23	1.24	1.25	1.21	1.22	1.21	1.2	1.2	1.25
Panelist 3 to DustTrak and UFP window	1.81	1.69	1.7	1.68	1.84	1.79	1.62	1.82	1.81	1.8	1.62	1.84
Panelist 3 to DustTrak and UFP door	1.31	1.29	1.31	1.32	1.32	1.29	1.23	1.31	1.3	1.32	1.23	1.32
Panelist 3 to gas sensors	1.82	1.8	1.79	1.81	1.8	1.78	1.73	1.74	1.73	1.72	1.72	1.82
Panelist 3 to collection panel window side	2.27	2.24	2.25	2.23	2.23	2.2	2.15	2.19	2.18	2.17	2.15	2.27
Panelist 3 to collection panel middle	2	1.9	1.89	1.91	1.9	1.8	1.74	1.54	1.55	1.53	1.53	2
Panelist 3 to collection panel door side	1.29	1.3	1.28	1.31	1.3	1.34	1.32	1.31	1.32	1.3	1.28	1.34
Panelist 3 to collection panel TVOC (middle)	1.16	1.1	1.18	1.1	1.15	1.11	1.12	1.13	1.12	1.11	1.1	1.18
Note
Mouth to traps in front of each panelists: 100 cm; sligth difference from panelist to panelist depending on the BMI; the chair was moved sligthly
Panelist 1 and Panelist 2 in front of collection panel
Panelist 3 in front of TVOC collection panel
