# Supplementary material for: Comprehensive Air Quality Assessment of the Tobacco Heating System 2.2 under Simulated Indoor Environments
Source: MDPI journal article supplement (doi:10.3390/atmos12080989), 2021-07-31
Supplement: s1 [file s1 › Supplementary Table S6.docx]

Table S6: Targeted screening of the background and environmental aerosol of THS 2.2 under the simulated Residential category III environment (0.5 h-1)

| **Compound** | **Filter** | | **Background** | | **THS 2.2** | | **THS 2.2** | |
| --- | --- | --- | --- | --- | --- | --- | --- | --- |
|  | **Mean**  **[ng/mL]** | **SD**  **[ng/mL]** | **Mean**  **[ng/mL]** | **SD**  **[ng/mL]** | **Mean**  **[ng/mL]** | **SD**  **[ng/mL]** | **Mean**  **[ng/m3]** | **SD**  **[ng/m3]** |
| 1-(1-Oxohexyl)-2-(3-pyridinyl)-pyrrolidine | nd | nd | nd | nd | nd | nd | nd | nd |
| 13,14-Dihydro-retinol | nd | nd | nd | nd | nd | nd | nd | nd |
| 1-Aminonaphthalene | nd | nd | nd | nd | nd | nd | nd | nd |
| 1-Linolenoylglycerol | nd | nd | nd | nd | nd | nd | nd | nd |
| 2,6-Dimethlyaniline | nd | nd | nd | nd | nd | nd | nd | nd |
| 2-Aminonaphthalene | nd | nd | nd | nd | nd | nd | nd | nd |
| 3-Aminobiphenyl | nd | nd | nd | nd | nd | nd | nd | nd |
| 3-Pyridinol | nd | nd | nd | nd | nd | nd | nd | nd |
| 5,6-Dihydropyridin-2(1H)-one | nd | nd | nd | nd | nd | nd | nd | nd |
| Anabasine | nd | nd | nd | nd | nd | nd | nd | nd |
| Anatabine | nd | nd | nd | nd | 1.702 | 0.22 | 16.72 | 2.2 |
| α-Tocopherol | 7.852 | 0.32 | 7.872 | 0.70 | 47.921 | 7.05 | 3911 | 69 |
| α-Tocopherolquinone | nd | nd | nd | nd | nd | nd | nd | nd |
| AαC (2-Amino-9H-pyrido[2,3-b]indole) | nd | nd | nd | nd | nd | nd | nd | nd |
| Coniferyl alcohol | nd | nd | nd | nd | nd | nd | nd | nd |
| Cotinine | 15.941 | 0.76 | 14.031 | 1.51 | 13.981 | 0.70 | na3 | na3 |
| Cotinine-N-ß-D-Glucuronide | nd | nd | nd | nd | nd | nd | nd | nd |
| Harmaline | nd | nd | nd | nd | nd | nd | nd | nd |
| Myosmine | nd | nd | nd | nd | nd | nd | nd | nd |
| N’-Acetylanatabine | nd | nd | nd | nd | nd | nd | nd | nd |
| N'-Carbomethoxyanabasine | nd | nd | nd | nd | nd | nd | nd | nd |
| N’-formylnornicotine | nd | nd | nd | nd | nd | nd | nd | nd |
| Nicotine | 19.741 | 2.95 | 16.951 | 2.56 | 16.151 | 2.73 | na3 | na3 |
| Nicotine-N’-Oxide | nd | nd | nd | nd | nd | nd | nd | nd |
| Nitrosonornicotine (NNN) | nd | nd | nd | nd | nd | nd | nd | nd |
| N’-Nitrosoanabasine | nd | nd | nd | nd | nd | nd | nd | nd |
| N’-Nitrosoanatabine | nd | nd | nd | nd | nd | nd | nd | nd |
| NNK | nd | nd | nd | nd | nd | nd | nd | nd |
| N’-Octanoylnornicotine | nd | nd | nd | nd | 2.931 | 0.29 | 28.71 | 2.83 |
| Nornicotine | nd | nd | nd | nd | nd | nd | nd | nd |
| *o*-Anisidine | nd | nd | nd | nd | nd | nd | nd | nd |
| *o*-Toluidine | nd | nd | nd | nd | nd | nd | nd | nd |
| Quinoline | nd | nd | nd | nd | nd | nd | nd | nd |
| Scopoletin | nd | nd | nd | nd | nd | nd | nd | nd |
| Triacetin | nd | nd | nd | nd | nd | nd | nd | nd |
| β-Nicotyrine | nd | nd | nd | nd | nd | nd | nd | nd |

1 Below LLOQ; 2 Below LOD ; 3Levels in never used PTFE-filters, background and THS samples are the same.

Note: details on the conversion are presented in Supplementary Table S6a-e.
