# Supplementary material for: Comprehensive Air Quality Assessment of the Tobacco Heating System 2.2 under Simulated Indoor Environments
Source: MDPI journal article supplement (doi:10.3390/atmos12080989), 2021-07-31
Supplement: s1 [file s1 › Supplementary Table S6.pdf]

Table S6: Targeted screening of the background and environmental aerosol of THS 2.2 under the simulated Residential category III environment (0.5 h<sup>-1</sup>)

| Compound                                      | Filter             |               | Background         |               | THS 2.2            |               | THS 2.2                      |                            |
|-----------------------------------------------|--------------------|---------------|--------------------|---------------|--------------------|---------------|------------------------------|----------------------------|
|                                               | Mean<br>[ng/mL]    | SD<br>[ng/mL] | Mean<br>[ng/mL]    | SD<br>[ng/mL] | Mean<br>[ng/mL]    | SD<br>[ng/mL] | Mean<br>[ng/m <sup>3</sup> ] | SD<br>[ng/m <sup>3</sup> ] |
| 1-(1-Oxoheptyl)-2-(3-pyridinyl)-pyrrolidine   | nd                 | nd            | nd                 | nd            | nd                 | nd            | nd                           | nd                         |
| 13,14-Dihydro-retinol                         | nd                 | nd            | nd                 | nd            | nd                 | nd            | nd                           | nd                         |
| 1-Aminonaphthalene                            | nd                 | nd            | nd                 | nd            | nd                 | nd            | nd                           | nd                         |
| 1-Linolenoylglycerol                          | nd                 | nd            | nd                 | nd            | nd                 | nd            | nd                           | nd                         |
| 2,6-Dimethylaniline                           | nd                 | nd            | nd                 | nd            | nd                 | nd            | nd                           | nd                         |
| 2-Aminonaphthalene                            | nd                 | nd            | nd                 | nd            | nd                 | nd            | nd                           | nd                         |
| 3-Aminobiphenyl                               | nd                 | nd            | nd                 | nd            | nd                 | nd            | nd                           | nd                         |
| 3-Pyridinol                                   | nd                 | nd            | nd                 | nd            | nd                 | nd            | nd                           | nd                         |
| 5,6-Dihydropyridin-2(1H)-one                  | nd                 | nd            | nd                 | nd            | nd                 | nd            | nd                           | nd                         |
| Anabasine                                     | nd                 | nd            | nd                 | nd            | nd                 | nd            | nd                           | nd                         |
| Anatabine                                     | nd                 | nd            | nd                 | nd            | 1.70 <sup>2</sup>  | 0.22          | 16.7 <sup>2</sup>            | 2.2                        |
| $\alpha$ -Tocopherol                          | 7.85 <sup>2</sup>  | 0.32          | 7.87 <sup>2</sup>  | 0.70          | 47.92 <sup>1</sup> | 7.05          | 391 <sup>1</sup>             | 69                         |
| $\alpha$ -Tocopherolquinone                   | nd                 | nd            | nd                 | nd            | nd                 | nd            | nd                           | nd                         |
| A $\alpha$ C (2-Amino-9H-pyrido[2,3-b]indole) | nd                 | nd            | nd                 | nd            | nd                 | nd            | nd                           | nd                         |
| Coniferyl alcohol                             | nd                 | nd            | nd                 | nd            | nd                 | nd            | nd                           | nd                         |
| Cotinine                                      | 15.94 <sup>1</sup> | 0.76          | 14.03 <sup>1</sup> | 1.51          | 13.98 <sup>1</sup> | 0.70          | na <sup>3</sup>              | na <sup>3</sup>            |
| Cotinine-N- $\beta$ -D-Glucuronide            | nd                 | nd            | nd                 | nd            | nd                 | nd            | nd                           | nd                         |
| Harmaline                                     | nd                 | nd            | nd                 | nd            | nd                 | nd            | nd                           | nd                         |
| Myosmine                                      | nd                 | nd            | nd                 | nd            | nd                 | nd            | nd                           | nd                         |
| N'-Acetylanatabine                            | nd                 | nd            | nd                 | nd            | nd                 | nd            | nd                           | nd                         |
| N'-Carbomethoxyanabasine                      | nd                 | nd            | nd                 | nd            | nd                 | nd            | nd                           | nd                         |
| N'-formylnornicotine                          | nd                 | nd            | nd                 | nd            | nd                 | nd            | nd                           | nd                         |
| Nicotine                                      | 19.74 <sup>1</sup> | 2.95          | 16.95 <sup>1</sup> | 2.56          | 16.15 <sup>1</sup> | 2.73          | na <sup>3</sup>              | na <sup>3</sup>            |
| Nicotine-N'-Oxide                             | nd                 | nd            | nd                 | nd            | nd                 | nd            | nd                           | nd                         |
| Nitrosornicotine (NNN)                        | nd                 | nd            | nd                 | nd            | nd                 | nd            | nd                           | nd                         |
| N'-Nitrosoanabasine                           | nd                 | nd            | nd                 | nd            | nd                 | nd            | nd                           | nd                         |
| N'-Nitrosoanatabine                           | nd                 | nd            | nd                 | nd            | nd                 | nd            | nd                           | nd                         |
| NNK                                           | nd                 | nd            | nd                 | nd            | nd                 | nd            | nd                           | nd                         |
| N'-Octanoylnornicotine                        | nd                 | nd            | nd                 | nd            | 2.93 <sup>1</sup>  | 0.29          | 28.7 <sup>1</sup>            | 2.83                       |
| Nornicotine                                   | nd                 | nd            | nd                 | nd            | nd                 | nd            | nd                           | nd                         |
| <i>o</i> -Anisidine                           | nd                 | nd            | nd                 | nd            | nd                 | nd            | nd                           | nd                         |
| <i>o</i> -Toluidine                           | nd                 | nd            | nd                 | nd            | nd                 | nd            | nd                           | nd                         |
| Quinoline                                     | nd                 | nd            | nd                 | nd            | nd                 | nd            | nd                           | nd                         |
| Scopoletin                                    | nd                 | nd            | nd                 | nd            | nd                 | nd            | nd                           | nd                         |

| Compound     | Filter          |               | Background      |               | THS 2.2         |               | THS 2.2                      |                            |
|--------------|-----------------|---------------|-----------------|---------------|-----------------|---------------|------------------------------|----------------------------|
|              | Mean<br>[ng/mL] | SD<br>[ng/mL] | Mean<br>[ng/mL] | SD<br>[ng/mL] | Mean<br>[ng/mL] | SD<br>[ng/mL] | Mean<br>[ng/m <sup>3</sup> ] | SD<br>[ng/m <sup>3</sup> ] |
| Triacetin    | nd              | nd            | nd              | nd            | nd              | nd            | nd                           | nd                         |
| β-Nicotyrine | nd              | nd            | nd              | nd            | nd              | nd            | nd                           | nd                         |

<sup>1</sup> Below LLOQ; <sup>2</sup> Below LOD ; <sup>3</sup> Levels in never used PTFE-filters, background and THS samples are the same.

Note: details on the conversion are presented in Supplementary Table S6a-e.
