# Supplementary material for: Comprehensive Air Quality Assessment of the Tobacco Heating System 2.2 under Simulated Indoor Environments
Source: MDPI journal article supplement (doi:10.3390/atmos12080989), 2021-07-31
Supplement: s1 [file s1 › Supplementary Table S6a-S6e.xlsx]

## Sheet: Tables
Supplementary Table S6a-e: Targeted screening of the background and environmental aerosol of THS 2.2 under the simulated Residential category III environment (0.5 h-1)
Supplementray Table S6a. Data from the system
Compound	CAS	Retention Time of analyte	Filter 1	Filter 2	Mean	SD	BKG 1	BKG 2	BKG 3	BKG 4	Mean	SD	THS 2.2 1	THS 2.2 2	THS 2.2 3	THS 2.2 4	Mean	SD
		min	ng/250µL	ng/250µL	ng/250µL	ng/250µL	ng/250µL	ng/250µL	ng/250µL	ng/250µL	ng/250µL	ng/250µL	ng/250µL	ng/250µL	ng/250µL	ng/250µL	ng/250µL	ng/250µL
1-(1-Oxohexyl)-2-(3-pyridinyl)-pyrrolidine	38854-09-0	12.5	N/F	N/F	N/F	N/F	N/F	N/F	N/F	N/F	N/F	N/F	N/F	N/F	N/F	N/F	N/F	N/F
13,14-Dihydro-retinol	115797-14-3	14.47	N/F	N/F	N/F	N/F	N/F	N/F	N/F	N/F	N/F	N/F	N/F	N/F	N/F	N/F	N/F	N/F
1-Aminonaphthalene	134-32-7	12.18	N/F	N/F	N/F	N/F	N/F	N/F	N/F	N/F	N/F	N/F	N/F	N/F	N/F	N/F	N/F	N/F
1-Linolenoylglycerol	18465-99-1	14.84	N/F	N/F	N/F	N/F	N/F	N/F	N/F	N/F	N/F	N/F	N/F	N/F	N/F	N/F	N/F	N/F
2,6-Dimethlyaniline	87-62-7	11.39	N/F	N/F	N/F	N/F	N/F	N/F	N/F	N/F	N/F	N/F	N/F	N/F	N/F	N/F	N/F	N/F
2-Aminonaphthalene	91-59-8	12.42	N/F	N/F	N/F	N/F	N/F	N/F	N/F	N/F	N/F	N/F	N/F	N/F	N/F	N/F	N/F	N/F
3-Aminobiphenyl	2243-47-2	13.43	N/F	N/F	N/F	N/F	N/F	N/F	N/F	N/F	N/F	N/F	N/F	N/F	N/F	N/F	N/F	N/F
3-Pyridinol	109-00-2	2.96	N/F	N/F	N/F	N/F	N/F	N/F	N/F	N/F	N/F	N/F	N/F	N/F	N/F	N/F	N/F	N/F
5,6-Dihydropyridin-2(1H)-one	6052-73-9	4.84	N/F	N/F	N/F	N/F	N/F	N/F	N/F	N/F	N/F	N/F	N/F	N/F	N/F	N/F	N/F	N/F
Anabasine	13078-04-1	7.91	N/F	N/F	N/F	N/F	N/F	N/F	N/F	N/F	N/F	N/F	N/F	N/F	N/F	N/F	N/F	N/F
Anatabine	581-49-7	7.42	N/F	N/F	N/F	N/F	N/F	N/F	N/F	N/F	N/F	N/F	0.468	0.349	0.464	0.423	0.426	0.0552147
α-Tocopherol	10191-41-0	17.16	1.962	2.075	2.0185	0.0799031	N/F	1.776	2.014	2.115	1.96833	0.174053	12.437	13.212	12.892	9.378	11.9797	1.76341
α-Tocopherolquinone	7559-04-8	16.68	N/F	N/F	N/F	N/F	N/F	N/F	N/F	N/F	N/F	N/F	N/F	N/F	N/F	N/F	N/F	N/F
AαC (2-Amino-9H-pyrido[2,3-b]indole)	26148-68-5	12.17	N/F	N/F	N/F	N/F	N/F	N/F	N/F	N/F	N/F	N/F	N/F	N/F	N/F	N/F	N/F	N/F
Coniferyl alcohol	458-35-5	9.63	N/F	N/F	N/F	N/F	N/F	N/F	N/F	N/F	N/F	N/F	N/F	N/F	N/F	N/F	N/F	N/F
Cotinine	486-56-6	7.21	3.985	3.718	3.8515	0.188798	4.073	3.322	3.319	3.32	3.5085	0.376335	3.582	3.23	3.584	3.581	3.49425	0.176171
Cotinine-N-ß-D-Glucuronide	139427-57-9	2.6	N/F	N/F	N/F	N/F	N/F	N/F	N/F	N/F	N/F	N/F	N/F	N/F	N/F	N/F	N/F	N/F
Harmaline	304-21-2	13.03	N/F	N/F	N/F	N/F	N/F	N/F	N/F	N/F	N/F	N/F	N/F	N/F	N/F	N/F	N/F	N/F
Myosmine	532-12-7	7.19	N/F	N/F	N/F	N/F	N/F	N/F	N/F	N/F	N/F	N/F	N/F	N/F	N/F	N/F	N/F	N/F
N'-Acetylanatabine	35764-54-6	8.67	N/F	N/F	N/F	N/F	N/F	N/F	N/F	N/F	N/F	N/F	N/F	N/F	N/F	N/F	N/F	N/F
N'-Carbomethoxyanabasine	56078-09-2	10.35	N/F	N/F	N/F	N/F	N/F	N/F	N/F	N/F	N/F	N/F	N/F	N/F	N/F	N/F	N/F	N/F
N'-formylnornicotine	3000-81-5	7.41	N/F	N/F	N/F	N/F	N/F	N/F	N/F	N/F	N/F	N/F	N/F	N/F	N/F	N/F	N/F	N/F
Nicotine	54-11-5	7.6	4.934	3.89	4.412	0.738219	3.921	5.194	3.963	3.868	4.2365	0.639516	3.361	3.745	4.084	4.962	4.038	0.683147
Nicotine-N'-Oxide	491-26-9	3.56	N/F	N/F	N/F	N/F	N/F	N/F	N/F	N/F	N/F	N/F	N/F	N/F	N/F	N/F	N/F	N/F
Nitrosonornicotine (NNN)	80508-23-2	8.2	N/F	N/F	N/F	N/F	N/F	N/F	N/F	N/F	N/F	N/F	N/F	N/F	N/F	N/F	N/F	N/F
N'-Nitrosoanabasine	37620-20-5	9.72	N/F	N/F	N/F	N/F	N/F	N/F	N/F	N/F	N/F	N/F	N/F	N/F	N/F	N/F	N/F	N/F
N'-Nitrosoanatabine	887407-16-1	9.55	N/F	N/F	N/F	N/F	N/F	N/F	N/F	N/F	N/F	N/F	N/F	N/F	N/F	N/F	N/F	N/F
NNK	64091-91-4	9.66	N/F	N/F	N/F	N/F	N/F	N/F	N/F	N/F	N/F	N/F	N/F	N/F	N/F	N/F	N/F	N/F
N'-Octanoylnornicotine	38854-10-3	14.25	N/F	N/F	N/F	N/F	N/F	N/F	N/F	N/F	N/F	N/F	0.777	0.658	0.683	0.808	0.7315	0.0722888
Nornicotine	494-97-3	6.6	N/F	N/F	N/F	N/F	N/F	N/F	N/F	N/F	N/F	N/F	N/F	N/F	N/F	N/F	N/F	N/F
o-Anisidine	90-04-0	8.34	N/F	N/F	N/F	N/F	N/F	N/F	N/F	N/F	N/F	N/F	N/F	N/F	N/F	N/F	N/F	N/F
o-Toluidine	95-53-4	8.59	N/F	N/F	N/F	N/F	N/F	N/F	N/F	N/F	N/F	N/F	N/F	N/F	N/F	N/F	N/F	N/F
Quinoline	‎91-22-5	9.16	N/F	N/F	N/F	N/F	N/F	N/F	N/F	N/F	N/F	N/F	N/F	N/F	N/F	N/F	N/F	N/F
Scopoletin	92-61-5	10.32	N/F	N/F	N/F	N/F	N/F	N/F	N/F	N/F	N/F	N/F	N/F	N/F	N/F	N/F	N/F	N/F
Triacetin	102-76-1	10.61	N/F	N/F	N/F	N/F	N/F	N/F	N/F	N/F	N/F	N/F	N/F	N/F	N/F	N/F	N/F	N/F
β-Nicotyrine	487-19-4	10.75	N/F	N/F	N/F	N/F	N/F	N/F	N/F	N/F	N/F	N/F	N/F	N/F	N/F	N/F	N/F	N/F
Table S6b. Calculation to μg/mL
Compound	CAS	Filter 1	Filter 2	Mean	SD	BKG 1	BKG 2	BKG 3	BKG 4	Mean	SD	THS 2.2 1	THS 2.2 2	THS 2.2 3	THS 2.2 4	Mean	SD
		μg/mL	μg/mL	μg/mL	μg/mL	μg/mL	μg/mL	μg/mL	μg/mL	μg/mL	μg/mL	μg/mL	μg/mL	μg/mL	μg/mL	μg/mL	μg/mL
1-(1-Oxohexyl)-2-(3-pyridinyl)-pyrrolidine	38854-09-0	nd	nd	nd	nd	nd	nd	nd	nd	nd	nd	nd	nd	nd	nd	nd	nd
13,14-Dihydro-retinol	115797-14-3	nd	nd	nd	nd	nd	nd	nd	nd	nd	nd	nd	nd	nd	nd	nd	nd
1-Aminonaphthalene	134-32-7	nd	nd	nd	nd	nd	nd	nd	nd	nd	nd	nd	nd	nd	nd	nd	nd
1-Linolenoylglycerol	18465-99-1	nd	nd	nd	nd	nd	nd	nd	nd	nd	nd	nd	nd	nd	nd	nd	nd
2,6-Dimethlyaniline	87-62-7	nd	nd	nd	nd	nd	nd	nd	nd	nd	nd	nd	nd	nd	nd	nd	nd
2-Aminonaphthalene	91-59-8	nd	nd	nd	nd	nd	nd	nd	nd	nd	nd	nd	nd	nd	nd	nd	nd
3-Aminobiphenyl	2243-47-2	nd	nd	nd	nd	nd	nd	nd	nd	nd	nd	nd	nd	nd	nd	nd	nd
3-Pyridinol	109-00-2	nd	nd	nd	nd	nd	nd	nd	nd	nd	nd	nd	nd	nd	nd	nd	nd
5,6-Dihydropyridin-2(1H)-one	6052-73-9	nd	nd	nd	nd	nd	nd	nd	nd	nd	nd	nd	nd	nd	nd	nd	nd
Anabasine	13078-04-1	nd	nd	nd	nd	nd	nd	nd	nd	nd	nd	nd	nd	nd	nd	nd	nd
Anatabine	581-49-7	nd	nd	nd	nd	nd	nd	nd	nd	nd	nd	0.001872	0.001396	0.001856	0.001692	0.001704	0.000220859
α-Tocopherol	10191-41-0	0.007848	0.0083	0.008074	0.000319612	nd	0.007104	0.008056	0.00846	0.00787333	0.000696211	0.049748	0.052848	0.051568	0.037512	0.047919	0.00705363
α-Tocopherolquinone	7559-04-8	nd	nd	nd	nd	nd	nd	nd	nd	nd	nd	nd	nd	nd	nd	nd	nd
AαC (2-Amino-9H-pyrido[2,3-b]indole)	26148-68-5	nd	nd	nd	nd	nd	nd	nd	nd	nd	nd	nd	nd	nd	nd	nd	nd
Coniferyl alcohol	458-35-5	nd	nd	nd	nd	nd	nd	nd	nd	nd	nd	nd	nd	nd	nd	nd	nd
Cotinine	486-56-6	0.01594	0.014872	0.015406	0.00075519	0.016292	0.013288	0.013276	0.01328	0.014034	0.00150534	0.014328	0.01292	0.014336	0.014324	0.013977	0.000704684
Cotinine-N-ß-D-Glucuronide	139427-57-9	nd	nd	nd	nd	nd	nd	nd	nd	nd	nd	nd	nd	nd	nd	nd	nd
Harmaline	304-21-2	nd	nd	nd	nd	nd	nd	nd	nd	nd	nd	nd	nd	nd	nd	nd	nd
Myosmine	532-12-7	nd	nd	nd	nd	nd	nd	nd	nd	nd	nd	nd	nd	nd	nd	nd	nd
N'-Acetylanatabine	35764-54-6	nd	nd	nd	nd	nd	nd	nd	nd	nd	nd	nd	nd	nd	nd	nd	nd
N'-Carbomethoxyanabasine	56078-09-2	nd	nd	nd	nd	nd	nd	nd	nd	nd	nd	nd	nd	nd	nd	nd	nd
N'-formylnornicotine	3000-81-5	nd	nd	nd	nd	nd	nd	nd	nd	nd	nd	nd	nd	nd	nd	nd	nd
Nicotine	54-11-5	0.019736	0.01556	0.017648	0.00295288	0.015684	0.020776	0.015852	0.015472	0.016946	0.00255806	0.013444	0.01498	0.016336	0.019848	0.016152	0.00273259
Nicotine-N'-Oxide	491-26-9	nd	nd	nd	nd	nd	nd	nd	nd	nd	nd	nd	nd	nd	nd	nd	nd
Nitrosonornicotine (NNN)	80508-23-2	nd	nd	nd	nd	nd	nd	nd	nd	nd	nd	nd	nd	nd	nd	nd	nd
N'-Nitrosoanabasine	37620-20-5	nd	nd	nd	nd	nd	nd	nd	nd	nd	nd	nd	nd	nd	nd	nd	nd
N'-Nitrosoanatabine	887407-16-1	nd	nd	nd	nd	nd	nd	nd	nd	nd	nd	nd	nd	nd	nd	nd	nd
NNK	64091-91-4	nd	nd	nd	nd	nd	nd	nd	nd	nd	nd	nd	nd	nd	nd	nd	nd
N'-Octanoylnornicotine	38854-10-3	nd	nd	nd	nd	nd	nd	nd	nd	nd	nd	0.003108	0.002632	0.002732	0.003232	0.002926	0.000289155
Nornicotine	494-97-3	nd	nd	nd	nd	nd	nd	nd	nd	nd	nd	nd	nd	nd	nd	nd	nd
o-Anisidine	90-04-0	nd	nd	nd	nd	nd	nd	nd	nd	nd	nd	nd	nd	nd	nd	nd	nd
o-Toluidine	95-53-4	nd	nd	nd	nd	nd	nd	nd	nd	nd	nd	nd	nd	nd	nd	nd	nd
Quinoline	‎91-22-5	nd	nd	nd	nd	nd	nd	nd	nd	nd	nd	nd	nd	nd	nd	nd	nd
Scopoletin	92-61-5	nd	nd	nd	nd	nd	nd	nd	nd	nd	nd	nd	nd	nd	nd	nd	nd
Triacetin	102-76-1	nd	nd	nd	nd	nd	nd	nd	nd	nd	nd	nd	nd	nd	nd	nd	nd
β-Nicotyrine	487-19-4	nd	nd	nd	nd	nd	nd	nd	nd	nd	nd	nd	nd	nd	nd	nd	nd
Supplementary Table S6c. Calculation to ng/mL
Compound	CAS	Filter 1	Filter 2	Mean	SD	BKG 1	BKG 2	BKG 3	BKG 4	Mean	SD	THS 2.2 1	THS 2.2 2	THS 2.2 3	THS 2.2 4	Mean	SD
		ng/mL	ng/mL	ng/mL	ng/mL	ng/mL	ng/mL	ng/mL	ng/mL	ng/mL	ng/mL	ng/mL	ng/mL	ng/mL	ng/mL	ng/mL	ng/mL
1-(1-Oxohexyl)-2-(3-pyridinyl)-pyrrolidine	38854-09-0	nd	nd	nd	nd	nd	nd	nd	nd	nd	nd	nd	nd	nd	nd	nd	nd
13,14-Dihydro-retinol	115797-14-3	nd	nd	nd	nd	nd	nd	nd	nd	nd	nd	nd	nd	nd	nd	nd	nd
1-Aminonaphthalene	134-32-7	nd	nd	nd	nd	nd	nd	nd	nd	nd	nd	nd	nd	nd	nd	nd	nd
1-Linolenoylglycerol	18465-99-1	nd	nd	nd	nd	nd	nd	nd	nd	nd	nd	nd	nd	nd	nd	nd	nd
2,6-Dimethlyaniline	87-62-7	nd	nd	nd	nd	nd	nd	nd	nd	nd	nd	nd	nd	nd	nd	nd	nd
2-Aminonaphthalene	91-59-8	nd	nd	nd	nd	nd	nd	nd	nd	nd	nd	nd	nd	nd	nd	nd	nd
3-Aminobiphenyl	2243-47-2	nd	nd	nd	nd	nd	nd	nd	nd	nd	nd	nd	nd	nd	nd	nd	nd
3-Pyridinol	109-00-2	nd	nd	nd	nd	nd	nd	nd	nd	nd	nd	nd	nd	nd	nd	nd	nd
5,6-Dihydropyridin-2(1H)-one	6052-73-9	nd	nd	nd	nd	nd	nd	nd	nd	nd	nd	nd	nd	nd	nd	nd	nd
Anabasine	13078-04-1	nd	nd	nd	nd	nd	nd	nd	nd	nd	nd	nd	nd	nd	nd	nd	nd
Anatabine	581-49-7	nd	nd	nd	nd	nd	nd	nd	nd	nd	nd	1.872	1.396	1.856	1.692	1.704	0.220859
α-Tocopherol	10191-41-0	7.848	8.3	8.074	0.319612	nd	7.104	8.056	8.46	7.87333	0.696211	49.748	52.848	51.568	37.512	47.919	7.05363
α-Tocopherolquinone	7559-04-8	nd	nd	nd	nd	nd	nd	nd	nd	nd	nd	nd	nd	nd	nd	nd	nd
AαC (2-Amino-9H-pyrido[2,3-b]indole)	26148-68-5	nd	nd	nd	nd	nd	nd	nd	nd	nd	nd	nd	nd	nd	nd	nd	nd
Coniferyl alcohol	458-35-5	nd	nd	nd	nd	nd	nd	nd	nd	nd	nd	nd	nd	nd	nd	nd	nd
Cotinine	486-56-6	15.94	14.872	15.406	0.75519	16.292	13.288	13.276	13.28	14.034	1.50534	14.328	12.92	14.336	14.324	13.977	0.704684
Cotinine-N-ß-D-Glucuronide	139427-57-9	nd	nd	nd	nd	nd	nd	nd	nd	nd	nd	nd	nd	nd	nd	nd	nd
Harmaline	304-21-2	nd	nd	nd	nd	nd	nd	nd	nd	nd	nd	nd	nd	nd	nd	nd	nd
Myosmine	532-12-7	nd	nd	nd	nd	nd	nd	nd	nd	nd	nd	nd	nd	nd	nd	nd	nd
N'-Acetylanatabine	35764-54-6	nd	nd	nd	nd	nd	nd	nd	nd	nd	nd	nd	nd	nd	nd	nd	nd
N'-Carbomethoxyanabasine	56078-09-2	nd	nd	nd	nd	nd	nd	nd	nd	nd	nd	nd	nd	nd	nd	nd	nd
N'-formylnornicotine	3000-81-5	nd	nd	nd	nd	nd	nd	nd	nd	nd	nd	nd	nd	nd	nd	nd	nd
Nicotine	54-11-5	19.736	15.56	17.648	2.95288	15.684	20.776	15.852	15.472	16.946	2.55806	13.444	14.98	16.336	19.848	16.152	2.73259
Nicotine-N'-Oxide	491-26-9	nd	nd	nd	nd	nd	nd	nd	nd	nd	nd	nd	nd	nd	nd	nd	nd
Nitrosonornicotine (NNN)	80508-23-2	nd	nd	nd	nd	nd	nd	nd	nd	nd	nd	nd	nd	nd	nd	nd	nd
N'-Nitrosoanabasine	37620-20-5	nd	nd	nd	nd	nd	nd	nd	nd	nd	nd	nd	nd	nd	nd	nd	nd
N'-Nitrosoanatabine	887407-16-1	nd	nd	nd	nd	nd	nd	nd	nd	nd	nd	nd	nd	nd	nd	nd	nd
NNK	64091-91-4	nd	nd	nd	nd	nd	nd	nd	nd	nd	nd	nd	nd	nd	nd	nd	nd
N'-Octanoylnornicotine	38854-10-3	nd	nd	nd	nd	nd	nd	nd	nd	nd	nd	3.108	2.632	2.732	3.232	2.926	0.289155
Nornicotine	494-97-3	nd	nd	nd	nd	nd	nd	nd	nd	nd	nd	nd	nd	nd	nd	nd	nd
o-Anisidine	90-04-0	nd	nd	nd	nd	nd	nd	nd	nd	nd	nd	nd	nd	nd	nd	nd	nd
o-Toluidine	95-53-4	nd	nd	nd	nd	nd	nd	nd	nd	nd	nd	nd	nd	nd	nd	nd	nd
Quinoline	‎91-22-5	nd	nd	nd	nd	nd	nd	nd	nd	nd	nd	nd	nd	nd	nd	nd	nd
Scopoletin	92-61-5	nd	nd	nd	nd	nd	nd	nd	nd	nd	nd	nd	nd	nd	nd	nd	nd
Triacetin	102-76-1	nd	nd	nd	nd	nd	nd	nd	nd	nd	nd	nd	nd	nd	nd	nd	nd
β-Nicotyrine	487-19-4	nd	nd	nd	nd	nd	nd	nd	nd	nd	nd	nd	nd	nd	nd	nd	nd
Supplementary Table S6d. Substraction of filters
Compound	CAS	Subtraction	BKG 1	BKG 2	BKG 3	BKG 4	Mean	SD	THS 2.2 1	THS 2.2 2	THS 2.2 3	THS 2.2 4	Mean	SD
		Mean filter	ng/mL	ng/mL	ng/mL	ng/mL	ng/mL	ng/mL	ng/mL	ng/mL	ng/mL	ng/mL	ng/mL	ng/mL
1-(1-Oxohexyl)-2-(3-pyridinyl)-pyrrolidine	38854-09-0	nd	nd	nd	nd	nd	nd	nd	nd	nd	nd	nd	nd	nd
13,14-Dihydro-retinol	115797-14-3	nd	nd	nd	nd	nd	nd	nd	nd	nd	nd	nd	nd	nd
1-Aminonaphthalene	134-32-7	nd	nd	nd	nd	nd	nd	nd	nd	nd	nd	nd	nd	nd
1-Linolenoylglycerol	18465-99-1	nd	nd	nd	nd	nd	nd	nd	nd	nd	nd	nd	nd	nd
2,6-Dimethlyaniline	87-62-7	nd	nd	nd	nd	nd	nd	nd	nd	nd	nd	nd	nd	nd
2-Aminonaphthalene	91-59-8	nd	nd	nd	nd	nd	nd	nd	nd	nd	nd	nd	nd	nd
3-Aminobiphenyl	2243-47-2	nd	nd	nd	nd	nd	nd	nd	nd	nd	nd	nd	nd	nd
3-Pyridinol	109-00-2	nd	nd	nd	nd	nd	nd	nd	nd	nd	nd	nd	nd	nd
5,6-Dihydropyridin-2(1H)-one	6052-73-9	nd	nd	nd	nd	nd	nd	nd	nd	nd	nd	nd	nd	nd
Anabasine	13078-04-1	nd	nd	nd	nd	nd	nd	nd	nd	nd	nd	nd	nd	nd
Anatabine	581-49-7	nd	nd	nd	nd	nd	nd	nd	1.872	1.396	1.856	1.692	1.704	0.220859
α-Tocopherol	10191-41-0	8.074	nd	-0.97	-0.018	0.386	-0.200667	0.696211	41.674	44.774	43.494	29.438	39.845	7.05363
α-Tocopherolquinone	7559-04-8	nd	nd	nd	nd	nd	nd	nd	nd	nd	nd	nd	nd	nd
AαC (2-Amino-9H-pyrido[2,3-b]indole)	26148-68-5	nd	nd	nd	nd	nd	nd	nd	nd	nd	nd	nd	nd	nd
Coniferyl alcohol	458-35-5	nd	nd	nd	nd	nd	nd	nd	nd	nd	nd	nd	nd	nd
Cotinine	486-56-6	15.406	0.886	-2.118	-2.13	-2.126	-1.372	1.50534	-1.078	-2.486	-1.07	-1.082	-1.429	0.704684
Cotinine-N-ß-D-Glucuronide	139427-57-9	nd	nd	nd	nd	nd	nd	nd	nd	nd	nd	nd	nd	nd
Harmaline	304-21-2	nd	nd	nd	nd	nd	nd	nd	nd	nd	nd	nd	nd	nd
Myosmine	532-12-7	nd	nd	nd	nd	nd	nd	nd	nd	nd	nd	nd	nd	nd
N'-Acetylanatabine	35764-54-6	nd	nd	nd	nd	nd	nd	nd	nd	nd	nd	nd	nd	nd
N'-Carbomethoxyanabasine	56078-09-2	nd	nd	nd	nd	nd	nd	nd	nd	nd	nd	nd	nd	nd
N'-formylnornicotine	3000-81-5	nd	nd	nd	nd	nd	nd	nd	nd	nd	nd	nd	nd	nd
Nicotine	54-11-5	17.648	-1.964	3.128	-1.796	-2.176	-0.702	2.55806	-4.204	-2.668	-1.312	2.2	-1.496	2.73259
Nicotine-N'-Oxide	491-26-9	nd	nd	nd	nd	nd	nd	nd	nd	nd	nd	nd	nd	nd
Nitrosonornicotine (NNN)	80508-23-2	nd	nd	nd	nd	nd	nd	nd	nd	nd	nd	nd	nd	nd
N'-Nitrosoanabasine	37620-20-5	nd	nd	nd	nd	nd	nd	nd	nd	nd	nd	nd	nd	nd
N'-Nitrosoanatabine	887407-16-1	nd	nd	nd	nd	nd	nd	nd	nd	nd	nd	nd	nd	nd
NNK	64091-91-4	nd	nd	nd	nd	nd	nd	nd	nd	nd	nd	nd	nd	nd
N'-Octanoylnornicotine	38854-10-3	nd	nd	nd	nd	nd	nd	nd	3.108	2.632	2.732	3.232	2.926	0.289155
Nornicotine	494-97-3	nd	nd	nd	nd	nd	nd	nd	nd	nd	nd	nd	nd	nd
o-Anisidine	90-04-0	nd	nd	nd	nd	nd	nd	nd	nd	nd	nd	nd	nd	nd
o-Toluidine	95-53-4	nd	nd	nd	nd	nd	nd	nd	nd	nd	nd	nd	nd	nd
Quinoline	‎91-22-5	nd	nd	nd	nd	nd	nd	nd	nd	nd	nd	nd	nd	nd
Scopoletin	92-61-5	nd	nd	nd	nd	nd	nd	nd	nd	nd	nd	nd	nd	nd
Triacetin	102-76-1	nd	nd	nd	nd	nd	nd	nd	nd	nd	nd	nd	nd	nd
β-Nicotyrine	487-19-4	nd	nd	nd	nd	nd	nd	nd	nd	nd	nd	nd	nd	nd
Supplementary Table S6e. Calculation to ng/m3
Compound	CAS	BKG 1	BKG 2	BKG 3	BKG 4	Mean	SD	THS 2.2 1	THS 2.2 2	THS 2.2 3	THS 2.2 4	Mean	SD
		ng/m3	ng/m3	ng/m3	ng/m3	ng/m3	ng/m3	ng/m3	ng/m3	ng/m3	ng/m3	ng/m3	ng/m3
1-(1-Oxohexyl)-2-(3-pyridinyl)-pyrrolidine	38854-09-0	nd	nd	nd	nd	nd	nd	nd	nd	nd	nd	nd	nd
13,14-Dihydro-retinol	115797-14-3	nd	nd	nd	nd	nd	nd	nd	nd	nd	nd	nd	nd
1-Aminonaphthalene	134-32-7	nd	nd	nd	nd	nd	nd	nd	nd	nd	nd	nd	nd
1-Linolenoylglycerol	18465-99-1	nd	nd	nd	nd	nd	nd	nd	nd	nd	nd	nd	nd
2,6-Dimethlyaniline	87-62-7	nd	nd	nd	nd	nd	nd	nd	nd	nd	nd	nd	nd
2-Aminonaphthalene	91-59-8	nd	nd	nd	nd	nd	nd	nd	nd	nd	nd	nd	nd
3-Aminobiphenyl	2243-47-2	nd	nd	nd	nd	nd	nd	nd	nd	nd	nd	nd	nd
3-Pyridinol	109-00-2	nd	nd	nd	nd	nd	nd	nd	nd	nd	nd	nd	nd
5,6-Dihydropyridin-2(1H)-one	6052-73-9	nd	nd	nd	nd	nd	nd	nd	nd	nd	nd	nd	nd
Anabasine	13078-04-1	nd	nd	nd	nd	nd	nd	nd	nd	nd	nd	nd	nd
Anatabine	581-49-7	nd	nd	nd	nd	nd	nd	18.3529	13.6863	18.1961	16.5882	16.7059	2.16528
α-Tocopherol	10191-41-0	nd	-9.5098	-0.176471	3.78431	-1.96732	6.8256	408.569	438.961	426.412	288.608	390.637	69.1532
α-Tocopherolquinone	7559-04-8	nd	nd	nd	nd	nd	nd	nd	nd	nd	nd	nd	nd
AαC (2-Amino-9H-pyrido[2,3-b]indole)	26148-68-5	nd	nd	nd	nd	nd	nd	nd	nd	nd	nd	nd	nd
Coniferyl alcohol	458-35-5	nd	nd	nd	nd	nd	nd	nd	nd	nd	nd	nd	nd
Cotinine	486-56-6	8.68627	-20.7647	-20.8824	-20.8431	-13.451	14.7583	-10.5686	-24.3725	-10.4902	-10.6078	-14.0098	6.90867
Cotinine-N-ß-D-Glucuronide	139427-57-9	nd	nd	nd	nd	nd	nd	nd	nd	nd	nd	nd	nd
Harmaline	304-21-2	nd	nd	nd	nd	nd	nd	nd	nd	nd	nd	nd	nd
Myosmine	532-12-7	nd	nd	nd	nd	nd	nd	nd	nd	nd	nd	nd	nd
N'-Acetylanatabine	35764-54-6	nd	nd	nd	nd	nd	nd	nd	nd	nd	nd	nd	nd
N'-Carbomethoxyanabasine	56078-09-2	nd	nd	nd	nd	nd	nd	nd	nd	nd	nd	nd	nd
N'-formylnornicotine	3000-81-5	nd	nd	nd	nd	nd	nd	nd	nd	nd	nd	nd	nd
Nicotine	54-11-5	-19.2549	30.6667	-17.6078	-21.3333	-6.88235	25.079	-41.2157	-26.1569	-12.8627	21.5686	-14.6667	26.7901
Nicotine-N'-Oxide	491-26-9	nd	nd	nd	nd	nd	nd	nd	nd	nd	nd	nd	nd
Nitrosonornicotine (NNN)	80508-23-2	nd	nd	nd	nd	nd	nd	nd	nd	nd	nd	nd	nd
N'-Nitrosoanabasine	37620-20-5	nd	nd	nd	nd	nd	nd	nd	nd	nd	nd	nd	nd
N'-Nitrosoanatabine	887407-16-1	nd	nd	nd	nd	nd	nd	nd	nd	nd	nd	nd	nd
NNK	64091-91-4	nd	nd	nd	nd	nd	nd	nd	nd	nd	nd	nd	nd
N'-Octanoylnornicotine	38854-10-3	nd	nd	nd	nd	nd	nd	30.4706	25.8039	26.7843	31.6863	28.6863	2.83485
Nornicotine	494-97-3	nd	nd	nd	nd	nd	nd	nd	nd	nd	nd	nd	nd
o-Anisidine	90-04-0	nd	nd	nd	nd	nd	nd	nd	nd	nd	nd	nd	nd
o-Toluidine	95-53-4	nd	nd	nd	nd	nd	nd	nd	nd	nd	nd	nd	nd
Quinoline	‎91-22-5	nd	nd	nd	nd	nd	nd	nd	nd	nd	nd	nd	nd
Scopoletin	92-61-5	nd	nd	nd	nd	nd	nd	nd	nd	nd	nd	nd	nd
Triacetin	102-76-1	nd	nd	nd	nd	nd	nd	nd	nd	nd	nd	nd	nd
β-Nicotyrine	487-19-4	nd	nd	nd	nd	nd	nd	nd	nd	nd	nd	nd	nd
