# Supplementary material for: Comprehensive Air Quality Assessment of the Tobacco Heating System 2.2 under Simulated Indoor Environments
Source: MDPI journal article supplement (doi:10.3390/atmos12080989), 2021-07-31
Supplement: s1 [file s1 › Supplementary Table S7-S9.pdf]

**Table S7:** Mean concentrations of gases during the background, break and THS 2.2 sessions under the simulated Residential category III environment (0.5 h<sup>-1</sup>)

| Compound <sup>1</sup>                            | BKG  | Break | THS  | % decrease<br>(Break vs BKG) | % decrease<br>(Break vs THS) | % decrease<br>(THS vs BKG) | Comment                                                                                        |
|--------------------------------------------------|------|-------|------|------------------------------|------------------------------|----------------------------|------------------------------------------------------------------------------------------------|
| CO (ppb)                                         | 289  | 160   | 287  | -45                          | -44                          | -0.7                       | No impact of THS use on CO levels                                                              |
| CO <sub>2</sub> (ppm)                            | 1318 | 746   | 1477 | -43                          | -49                          | 12.0                       | Slight increase of CO <sub>2</sub> level during THS use, probably due to intensified breathing |
| NH <sub>3</sub> (ppb)                            | 23.6 | 38.2  | 38.1 | 62                           | 0                            | 61.4                       | Increase of NH <sub>3</sub> levels probably due to “pumping” NH <sub>3</sub> from outside      |
| NO (ppb)                                         | 12.9 | 6.1   | 11.7 | -53                          | -48                          | -9.5                       | No impact of THS use on NO levels                                                              |
| NO <sub>x</sub> (ppb)                            | 17.8 | 10.5  | 15.8 | -41                          | -34                          | -10.9                      | No impact of THS use on NO <sub>x</sub> levels                                                 |
| O <sub>3</sub> (µg/m <sup>3</sup> ) <sup>2</sup> | <LOD | <LOD  | <LOD | na                           | na                           | na                         | na                                                                                             |

<sup>1</sup>BKG, Background, na, not applicable, THS, Tobacco Heating System 2.2; <sup>2</sup>Below LOD of 4 µg/m<sup>3</sup>.

**Table S8:** Mean concentrations of gases during the background, break and THS 2.2 sessions under the simulated Store environment (2.4 h<sup>-1</sup>)

| Compound <sup>1,2</sup>                          | BKG  | Break | THS  | % decrease<br>(Break vs BKG) | % decrease<br>(Break vs THS) | % decrease<br>(THS vs BKG) | Comment                                                                                        |
|--------------------------------------------------|------|-------|------|------------------------------|------------------------------|----------------------------|------------------------------------------------------------------------------------------------|
| CO (ppb)                                         | 235  | 170   | 230  | -28                          | -26                          | -2.4                       | No impact of THS use on CO levels                                                              |
| CO <sub>2</sub> (ppm)                            | 770  | 536   | 821  | -30                          | -35                          | 6.6                        | Slight increase of CO <sub>2</sub> level during THS use, probably due to intensified breathing |
| NH <sub>3</sub> (ppb)                            | 20.4 | 16.1  | 19.4 | -21                          | -17                          | -4.8                       | No impact of THS use on NH <sub>3</sub> levels                                                 |
| NO (ppb)                                         | 2.65 | 2.16  | 2.57 | -18                          | -16                          | -3.0                       | No impact of THS use on NO levels                                                              |
| NO <sub>x</sub> (ppb)                            | 5.53 | 4.34  | 5.18 | -21                          | -16                          | -6.3                       | No impact of THS use on NO <sub>x</sub> levels                                                 |
| O <sub>3</sub> (µg/m <sup>3</sup> ) <sup>3</sup> | <LOD | 6.50  | <LOD | na                           | na                           | na                         | na                                                                                             |

<sup>1</sup>BKG, Background, na, not applicable, THS, Tobacco Heating System 2.2; <sup>2</sup>Mean concentrations for day II-IV. The measurements on day I were conducted with different design and were excluded from the processing for consistency reasons; <sup>3</sup>Below LOD of 4 µg/m<sup>3</sup> except for session Break.

**Table S9.** Mean concentrations of gases during the background, break and THS 2.2 sessions under the simulated Restaurant environment (4.3 h<sup>-1</sup>)

| Compound <sup>1</sup>                            | BKG  | Break | THS  | % decrease<br>(Break vs BKG) | % decrease<br>(Break vs P1) | % decrease<br>(THS vs BKG) | Comment                                                                                        |
|--------------------------------------------------|------|-------|------|------------------------------|-----------------------------|----------------------------|------------------------------------------------------------------------------------------------|
| CO (ppb)                                         | 177  | 146   | 172  | -18                          | -15                         | -2.7                       | No impact of THS use on CO levels                                                              |
| CO <sub>2</sub> (ppm)                            | 634  | 541   | 678  | -15                          | -20                         | 6.8                        | Slight increase of CO <sub>2</sub> level during THS use, probably due to intensified breathing |
| NH <sub>3</sub> (ppb)                            | 18.2 | 13.8  | 20.0 | -24                          | -31                         | 10.1                       | Low impact of THS on NH <sub>3</sub> levels                                                    |
| NO (ppb)                                         | 5.1  | 3.9   | 4.9  | -25                          | -21                         | -4.7                       | No impact of THS use on NO levels                                                              |
| NO <sub>x</sub> (ppb)                            | 7.7  | 6.6   | 7.4  | -14                          | -11                         | -4.0                       | No impact of THS use on NO <sub>x</sub> levels                                                 |
| O <sub>3</sub> (µg/m <sup>3</sup> ) <sup>2</sup> | <LOD | <LOD  | <LOD | na                           | na                          | na                         | na                                                                                             |

<sup>1</sup>BKG, Background, na, not applicable, THS, Tobacco Heating System 2.2; <sup>2</sup>Below LOD of 4 µg/m<sup>3</sup>.
