# Supplementary material for: Comprehensive Air Quality Assessment of the Tobacco Heating System 2.2 under Simulated Indoor Environments
Source: MDPI journal article supplement (doi:10.3390/atmos12080989), 2021-07-31
Supplement: s1 [file s1 › Supplementary Table S10.xlsx]

## Sheet: Table S10
	Supplementary Table S10: Airborne constituents in the C6-C16 window of the TVOC method for the Background and environmental aerosol of THS under simulated Residential category III (0.5 h-1), Store (2.4 h-1), and Restaurant (4.3 h-1) environments
	Session		BKG	THS	BKG	THS	BKG	THS	BKG	THS	BKG	THS	BKG	THS	BKG	THS	BKG	THS	BKG	THS	BKG	THS	BKG	THS	BKG	THS
	No sticks		0	12	0	12	0	12	0	12	0	12	0	12	0	12	0	12	0	12	0	12	0	12	0	12
	No occupants		4	4	4	4	4	4	4	4	4	4	4	4	4	4	4	4	4	4	4	4	4	4	4	4
	Air changes/h		0.5	0.5	0.5	0.5	0.5	0.5	0.5	0.5	2.4	2.4	2.4	2.4	2.4	2.4	2.4	2.4	4.3	4.3	4.3	4.3	4.3	4.3	4.3	4.3
	TVOC value (µg/m3)		23.5	34.76	55.99	87.79	41.49	60.62	20.13	47.94	6.37	12.35	5.56	17.87	4.01	15.43	3.76	9.91	<2.00	6.11	2.17	8.72	2.17	2.27	6.14	11.83
	Name	CAS	Rep 1	Rep 1	Rep 2	Rep 2	Rep 3	Rep 3	Rep 4	Rep 4	Rep 1	Rep 1	Rep 2	Rep 2	Rep 3	Rep 3	Rep 4	Rep 4	Rep 1	Rep 1	Rep 2	Rep 2	Rep 3	Rep 3	Rep 4	Rep 4
1	n-Hexane	110-54-3																				*			*	*
2	Acetic acid	64-19-7	*	*	*	*	*	*		*
3	Benzene	71-43-2	*	*	*	*	*	*		*
4	2,2,3,3-Tetramethylbutane	594-82-1
5	Propylene Glycol	57-55-6	*	*	*	*	*	*
6	Toluene	108-88-3		*	*	*	*									*	*
7	Benzaldehyde	100-52-7	*	*	*	*	*	*	*	*	*	*	*	*	*	*	*	*		*	*	*	*	*	*	*
8	Octamethylcyclotetrasiloxane	556-67-2						*
9	D-Limonene	5989-27-5				*	*															*				*
10	Eucalyptol	470-82-6							*
11	Benzyl alcohol	100-51-6	*	*	*	*	*	*	*	*
12	Nonanal	124-19-6	*	*	*	*		*	*	*
13	Decamethylcyclopentasiloxane	541-02-6	*			*
14	Decamethylpentasiloxane	995-83-5								*			*			*
15	Octanoic acid	124-07-2		*		*	*	*
16	DL-Menthol	89-78-1		*	*	*	*	*		*		*								*		*				*
17	Dodecane	112-40-3							*
18	Decanal	112-31-2	*		*	*			*	*				*		*		*
19	2-Phenoxyethanol	122-99-6					*	*
20	2,6,10 - Trimethyltridecanea	3891-99-4					*
21	Dodecamethylcyclohexasiloxane	540-97-6	*	*	*	*	*	*
22	Triacetin	102-76-1
23	Diisopropyl adipate	6938-94-9			*	*
24	Tetradecamethylcycloheptasiloxane	107-50-6	*	*	*	*	*	*
	a without stereochemistry
