# Supplementary material for: Comprehensive Air Quality Assessment of the Tobacco Heating System 2.2 under Simulated Indoor Environments
Source: MDPI journal article supplement (doi:10.3390/atmos12080989), 2021-07-31
Supplement: s1 [file s1 › Supplementary Table S11.xlsx]

## Sheet: Table S11
	Table S11: Concentrations of airborne constituents in the C6-C16 window of the TVOC method for assessing the background and environmental aerosol of THS under the simulated Residential category III (0.5 h-1) environment
	Session		BKG	THS	BKG	THS	BKG	THS	BKG	THS
	No sticks		0	12	0	12	0	12	0	12
	No occupants		4	4	4	4	4	4	4	4
	TVOC value (µg/m3)		23.5	34.76	55.99	87.79	41.49	60.62	20.13	47.94
	Compound	CAS	Rep 1	Rep 1	Rep 2	Rep 2	Rep 3	Rep 3	Rep 4	Rep 4
1	1-Butanol1	71-36-3	ND	ND	ND	ND	ND	ND	ND	<LOQ4
2	Toluene1	108-88-3	<LOQ	2.05	<LOQ	<LOQ	2.08	<LOQ	<LOQ	<LOQ
3	Hexamethylcyclotrisiloxane1	541-05-9	<LOQ	<LOQ	<LOQ	<LOQ	<LOQ	<LOQ	<LOQ	<LOQ
4	Benzaldehyde1	100-52-7	6.25	7.19	6.42	6.95	6.34	6.88	5.62	6.1
5	Benzyl alcohol1	100-51-6	3.71	5.12	3.92	5.54	6.14	6.72	4.7	5.86
6	Nonanal1	124-19-6	2.68	2.85	2.32	2.53	<LOQ	2.13	2.89	2.85
7	Decamethylcyclopentasiloxane1	541-02-6	<LOQ	<LOQ	<LOQ	<LOQ	<LOQ	<LOQ	<LOQ	<LOQ
8	2-Phenoxyethanol1	122-99-6	<LOQ	<LOQ	<LOQ	<LOQ	2.36	<LOQ	ND	ND
9	Siloxane derivative1	#N/A	3.65	4.57	3.84	4.26	3.86	4.46	ND	ND
10	Acetic acid1	64-19-7	2.84	3.48	3.93	4.13	3.19	3.71	<LOQ	2.55
11	1-Hydroxy-2-propanone (acetol)1	116-09-6	ND	ND	ND	ND	ND	ND	ND	ND
12	Propylene glycol1	57-55-6	2.22	2.85	14.47	28.55	6.84	8.51	<LOQ	<LOQ
13	Furfural1	98-01-1	<LOQ	<LOQ	<LOQ	<LOQ	<LOQ	<LOQ	<LOQ	<LOQ
14	2-Furanmethanol1	98-00-0	ND	ND	ND	ND	ND	ND	ND	ND
15	1,4-Butanediol1	110-63-4	ND	ND	ND	ND	ND	ND	ND	ND
16	3-Pyridinol1	109-00-2	ND	ND	ND	ND	ND	ND	ND	ND
17	Pyranone1	28564-83-2	ND	ND	ND	ND	ND	ND	ND	ND
18	Triacetin1	102-76-1	ND	<LOQ	ND	<LOQ	ND	<LOQ	ND	<LOQ
19	Ethyl decanoate1	110-38-3	ND	ND	ND	ND	ND	ND	ND	ND
20	Glycidol1	556-52-5	<LOQ	<LOQ	<LOQ	<LOQ	<LOQ	<LOQ	<LOQ	<LOQ
21	3-Chloro-1,2-Propandiol1	96-24-2	<LOQ	<LOQ	<LOQ	<LOQ	<LOQ	<LOQ	<LOQ	<LOQ
22	2-Chloro-1,2-Propandiol1	185805-20-3	<LOQ	<LOQ	<LOQ	<LOQ	<LOQ	<LOQ	<LOQ	<LOQ
23	Toluene2	108-88-3	1.55	1.68	1.39	1.3	1.79	1.48	0.87	0.82
24	Ethylbenzene2	100-41-4	0.37	0.34	0.33	0.31	0.37	0.34	0.06	0.03
25/26	m-/p-Xylene2	108-38-3/106-42-3	0.45	0.4	0.42	0.36	0.51	0.4	0.06	0.03
27	Styrene2	100-42-5	0.67	0.68	0.64	0.61	0.65	0.65	0.31	0.31
28	o-Xylene2	95-47-6	0.28	0.23	0.25	0.19	0.34	0.23	ND	ND
29	p-Dichlorobenzene2	106-46-7	0.14	0.14	0.14	0.14	0.14	0.14	ND	ND
30	Tetradecane2	629-59-4	1.1	1.16	1.03	1.05	1.11	1.05	0.47	0.43
	Total (µg/m3)		21.36	28.11	34.9	51.97	30.82	32.42	13.21	17.37
	BKG-related compounds (µg/m3)		16.29	21.78	16.51	19.29	20.79	20.2	13.21	14.82
	THS 2.2-related compounds(µg/m3)		5.06	6.33	18.4	32.68	10.03	12.22	0	2.55
	BKG-related compounds (%)		76	77	47	37	67	62	100	85
	THS 2.2-related compounds(%)		24	23	53	63	33	38	0	15
	1The concentrations of the compounds were measured based on toluene equivalents; 2The concentrations of the compounds were measured based on mixture of authentic standards (Japanese mix); 3ND: <LOD, 4<LOQ: “present <2µg/m3”.
			Below standard 1 of Japanese mix
