# Supplementary material for: Comprehensive Air Quality Assessment of the Tobacco Heating System 2.2 under Simulated Indoor Environments
Source: MDPI journal article supplement (doi:10.3390/atmos12080989), 2021-07-31
Supplement: s1 [file s1 › Supplementary Table S12.xlsx]

## Sheet: Table S12
	Table S12: Concentrations of airborne constituents in the C6-C16 window of the TVOC method for assessing the background and environmental aerosol of THS under the simulated Store (2.4 h-1) environment
	Session		BKG	THS	BKG	THS	BKG	THS	BKG	THS
	No sticks		0	12	0	12	0	12	0	12
	No occupants		4	4	4	4	4	4	4	4
	TVOC value (µg/m3)		6.37	12.35	5.56	17.87	4.01	15.43	3.76	9.91
	Compound		Rep 1	Rep 1	Rep 2	Rep 2	Rep 3	Rep 3	Rep 4	Rep 4
1	1-Butanol1	71-36-3	ND3	ND	ND	<LOQ	ND	ND	ND	ND
2	Toluene1	108-88-3	<LOQ4	<LOQ	<LOQ	<LOQ	<LOQ	2.25	2.09	<LOQ
3	Hexamethylcyclotrisiloxane1	541-05-9	<LOQ	<LOQ	<LOQ	<LOQ	<LOQ	<LOQ	<LOQ	<LOQ
4	Benzaldehyde1	100-52-7	2.77	3.02	4.16	3.77	4.01	5.1	3.78	4.33
5	Benzyl alcohol1	100-51-6	3.03	3.5	<LOQ	<LOQ	<LOQ	<LOQ	<LOQ	<LOQ
6	Nonanal1	124-19-6	<LOQ	<LOQ	<LOQ	<LOQ	<LOQ	<LOQ	<LOQ	<LOQ
7	Decamethylcyclopentasiloxane1	541-02-6	<LOQ	<LOQ	4	<LOQ	<LOQ	<LOQ	<LOQ	<LOQ
8	2-Phenoxyethanol1	122-99-6	ND	ND	<LOQ	<LOQ	<LOQ	<LOQ	<LOQ	<LOQ
9	Siloxane derivative1	#N/A	ND	ND	ND	ND	ND	ND	ND	ND
10	Acetic acid1	64-19-7	<LOQ	<LOQ	3.97	<LOQ	<LOQ	<LOQ	<LOQ	<LOQ
11	1-Hydroxy-2-propanone (acetol)1	116-09-6	ND	ND	ND	ND	ND	ND	ND	ND
12	Propylene glycol1	57-55-6	<LOQ	<LOQ	ND	ND	ND	ND	ND	ND
13	Furfural1	98-01-1	<LOQ	<LOQ	ND	ND	ND	ND	ND	ND
14	2-Furanmethanol1	98-00-0	ND	ND	ND	ND	ND	ND	ND	ND
15	1,4-Butanediol1	110-63-4	ND	ND	ND	ND	ND	ND	ND	ND
16	3-Pyridinol1	109-00-2	ND	ND	ND	ND	ND	ND	ND	ND
17	Pyranone1	28564-83-2	ND	ND	ND	ND	ND	ND	ND	ND
18	Triacetin1	102-76-1	ND	<LOQ	ND	<LOQ	ND	<LOQ	ND	<LOQ
19	Ethyl decanoate1	110-38-3	ND	ND	ND	ND	ND	ND	ND	ND
20	Glycidol1	556-52-5	<LOQ	<LOQ	<LOQ	<LOQ	<LOQ	<LOQ	<LOQ	<LOQ
21	3-Chloro-1,2-Propandiol1	96-24-2	<LOQ	<LOQ	<LOQ	<LOQ	<LOQ	<LOQ	<LOQ	<LOQ
22	2-Chloro-1,2-Propandiol1	185805-20-3	<LOQ	<LOQ	<LOQ	<LOQ	<LOQ	<LOQ	<LOQ	<LOQ
23	Toluene2	108-88-3	0.45	0.34	1.37	0.68	1.26	1.57	1.55	1.32
24	Ethylbenzene2	100-41-4	ND	ND	ND	ND	ND	ND	ND	ND
25/26	m-/p-Xylene2	108-38-3/106-42-3	ND	ND	ND	ND	ND	ND	ND	ND
27	Styrene2	100-42-5	0.25	0.25	ND	ND	ND	ND	ND	ND
28	o-Xylene2	95-47-6	ND	ND	ND	ND	ND	ND	ND	ND
29	p-Dichlorobenzene2	106-46-7	ND	ND	ND	ND	ND	ND	ND	ND
30	Tetradecane2	629-59-4	0.5	0.45	ND	ND	ND	ND	ND	ND
	Total		5.8	6.52	12.13	3.77	4.01	7.35	5.87	4.33
	BKG-related compounds		5.8	6.52	8.16	3.77	4.01	7.35	5.87	4.33
	THS 2.2-related compounds		0	0	3.97	0	0	0	0	0
	% BKG-related compounds		100	100	67	100	100	100	100	100
	% THS 2.2-related compounds		0	0	33	0	0	0	0	0
	1The concentrations of the compounds were measured based on toluene equivalents; 2The concentrations of the compounds were measured based on mixture of authentic standards (Japanese mix); 3ND: <LOD, 4<LOQ: “present <2µg/m3”.
			Below standard 1 of Japanese mix
