# Supplementary material for: Comprehensive Air Quality Assessment of the Tobacco Heating System 2.2 under Simulated Indoor Environments
Source: MDPI journal article supplement (doi:10.3390/atmos12080989), 2021-07-31
Supplement: s1 [file s1 › Supplementary Table S13.xlsx]

## Sheet: Table S13
	Table S13: Concentrations of airborne constituents in the C6-C16 window of the TVOC method for assessing the background and environmental aerosol of THS under simulated Restaurant (4.3 h-1) environment
	Session		BKG	THS	BKG	THS	BKG	THS	BKG	THS
	No sticks		0	12	0	12	0	12	0	12
	No occupants		4	4	4	4	4	4	4	4
	TVOC value (µg/m3)		2	6.11	2.17	8.72	2.17	2.27	6.14	11.83
	Compound		Rep 1	Rep 1	Rep 2	Rep 2	Rep 3	Rep 3	Rep 4	Rep 4
1	1-Butanol1	71-36-3	ND3	ND	ND	ND	ND	ND	ND	ND
2	Toluene1	108-88-3	<LOQ4	<LOQ	<LOQ	<LOQ	<LOQ	<LOQ	<LOQ	<LOQ
3	Hexamethylcyclotrisiloxane1	541-05-9	<LOQ	<LOQ	<LOQ	<LOQ	<LOQ	<LOQ	<LOQ	<LOQ
4	Benzaldehyde1	100-52-7	<LOQ	2.06	2.12	<LOQ	2.15	<LOQ	<LOQ	2.13
5	Benzyl alcohol1	100-51-6	<LOQ	<LOQ	<LOQ	<LOQ	<LOQ	<LOQ	<LOQ	<LOQ
6	Nonanal1	124-19-6	<LOQ	<LOQ	<LOQ	<LOQ	<LOQ	<LOQ	<LOQ	<LOQ
7	Decamethylcyclopentasiloxane1	541-02-6	<LOQ	<LOQ	<LOQ	<LOQ	<LOQ	<LOQ	<LOQ	<LOQ
8	2-Phenoxyethanol1	122-99-6	ND	ND	ND	ND	ND	ND	ND	ND
9	Siloxane derivative1	#N/A	<LOQ	<LOQ	<LOQ	<LOQ	<LOQ	<LOQ	<LOQ	<LOQ
10	Acetic acid1	64-19-7	<LOQ	<LOQ	<LOQ	<LOQ	<LOQ	<LOQ	<LOQ	<LOQ
11	1-Hydroxy-2-propanone (acetol)1	116-09-6	ND	ND	ND	ND	ND	ND	ND	ND
12	Propylene glycol1	57-55-6	<LOQ	<LOQ	<LOQ	<LOQ	<LOQ	<LOQ	<LOQ	<LOQ
13	Furfural1	98-01-1	<LOQ	<LOQ	<LOQ	<LOQ	<LOQ	<LOQ	<LOQ	<LOQ
14	2-Furanmethanol1	98-00-0	ND	ND	ND	ND	ND	ND	ND	ND
15	1,4-Butanediol1	110-63-4	ND	ND	ND	ND	ND	ND	ND	ND
16	3-Pyridinol1	109-00-2	ND	ND	ND	ND	ND	ND	ND	ND
17	Pyranone1	28564-83-2	ND	ND	ND	ND	ND	ND	ND	ND
18	Triacetin1	102-76-1	ND	<LOQ	ND	<LOQ	ND	<LOQ	ND	<LOQ
19	Ethyl decanoate1	110-38-3	ND	ND	ND	ND	ND	ND	ND	ND
20	Glycidol1	556-52-5	<LOQ	<LOQ	<LOQ	<LOQ	<LOQ	<LOQ	<LOQ	<LOQ
21	3-Chloro-1,2-Propandiol1	96-24-2	<LOQ	<LOQ	<LOQ	<LOQ	<LOQ	<LOQ	<LOQ	<LOQ
22	2-Chloro-1,2-Propandiol1	185805-20-3	<LOQ	<LOQ	<LOQ	<LOQ	<LOQ	<LOQ	<LOQ	<LOQ
23	Toluene2	108-88-3	0.71	0.67	1.12	1.15	1.09	1.03	1.04	1.01
24	Ethylbenzene2	100-41-4	0.16	0.17	0.22	0.22	0.19	0.19	0.22	0.2
25/26	m-/p-Xylene2	108-38-3/106-42-3	0.19	0.19	0.27	0.25	0.25	0.22	0.25	0.22
27	Styrene2	100-42-5	0.71	0.72	0.71	0.71	0.72	0.71	0.71	0.73
28	o-Xylene2	95-47-6	0.14	0.14	0.19	0.16	0.17	0.16	0.19	0.17
29	p-Dichlorobenzene2	106-46-7	0.19	0.19	0.19	0.19	0.19	0.19	0.19	0.2
30	Tetradecane2	629-59-4	0.77	0.75	0.77	0.74	0.75	0.73	0.77	0.75
	Total		0	2.06	2.12	0	2.15	0	0	2.13
	BKG-related compounds		0	2.06	2.12	0	2.15	0	0	2.13
	THS 2.2-related compounds		0	0	0	0	0	0	0	0
	% BKG-related compounds		0	100	100	0	100	0	0	100
	% THS 2.2-related compounds		0	0	0	0	0	0	0	0
	1The concentrations of the compounds were measured based on toluene equivalents; 2The concentrations of the compounds were measured based on mixture of authentic standards (Japanese mix); 3ND: <LOD, 4<LOQ: “present <2µg/m3”.
			Below standard 1 of Japanese mix
