# Supplementary material for: Comprehensive Air Quality Assessment of the Tobacco Heating System 2.2 under Simulated Indoor Environments
Source: MDPI journal article supplement (doi:10.3390/atmos12080989), 2021-07-31
Supplement: s1 [file s1 › Supplementary Table S14.xlsx]

## Sheet: Supplementary Table S14
Supplementray Table S14: Parameters of the machine puffing regimens
Regime	Puff volume	Puff duration	Puff interval	Number of puffs	Accumulations*
	[mL]	[s]	[s]	[n]	[n]
ISO	35	2	60	6	5
D	30	1.8	15	12	4
HCI	55	2	30	12	3
SR-6	80	2.4	25	14	3
E	70	1.5	13	14	3
* Accumulation: number of sticks used for the smoking-machine collection of aerosol
