# Supplementary material for: Comprehensive Air Quality Assessment of the Tobacco Heating System 2.2 under Simulated Indoor Environments
Source: MDPI journal article supplement (doi:10.3390/atmos12080989), 2021-07-31
Supplement: s1 [file s1 › Supplementary Table S15.xlsx]

## Sheet: Supplementary Table SX MLE
Table S15: Airborne nicotine derived from mouth-level exposure measuremnts
Test number	n	Product	ACH	Session	MLE [mg nicotine/test item]	Decay time relative to stick n [min] tn	2-h averaged airborne nicotinea concentration respective to stick n [µg/m3] Cn, nic, 2-h	2-h averaged airborne nicotinea concentration (cumulative) [µg/m3] C(n)nic, 2-h	Stick collection time (To:12h30)
4864512	1	Sienna	0.5	28.01.2020	1.83898	119	15.9999	15.9999	12:31:00
4864504	2	Sienna	0.5	28.01.2020	2.03807	117	17.5563	33.5562	12:33:00
4864508	3	Amber	0.5	28.01.2020	1.28027	117	11.0285	44.5847	12:33:00
4864513	4	Sienna	0.5	28.01.2020	1.76466	100	13.8001	58.3848	12:50:00
4864505	5	Turquoise	0.5	28.01.2020	1.51102	93	11.2709	69.6557	12:57:00
4864509	6	Amber	0.5	28.01.2020	1.17604	87	8.38804	78.0438	13:03:00
4864760	7	Sienna	0.5	28.01.2020	1.37587	65	7.95878	86.0025	13:25:00
4864752	8	Sienna	0.5	28.01.2020	1.95421	61	10.7712	96.7738	13:29:00
4864756	9	Amber	0.5	28.01.2020	1.21719	60	6.62418	103.398	13:30:00
4864761	10	Sienna	0.5	28.01.2020	0.548741	42	2.24135	105.639	13:48:00
4864753	11	Turquoise	0.5	28.01.2020	1.20851	34	4.12417	109.763	13:56:00
4864757	12	Amber	0.5	28.01.2020	1.22274	33	4.06611	113.83	13:57:00
4864524	1	Turquoise	0.5	29.01.2020	1.34356	118	11.6319	11.6319	12:32:00
4864516	2	Sienna	0.5	29.01.2020	1.28481	117	11.0677	22.6996	12:33:00
4864520	3	Bronze	0.5	29.01.2020	1.61723	117	13.9312	36.6307	12:33:00
4864525	4	Sienna	0.5	29.01.2020	1.45897	88	10.4871	47.1178	13:02:00
4864521	5	Turquoise	0.5	29.01.2020	1.01768	87	7.25853	54.3764	13:03:00
4864517	6	Sienna	0.5	29.01.2020	1.319	85	9.25922	63.6356	13:05:00
4864764	7	Sienna	0.5	29.01.2020	1.64081	58	8.69824	72.3338	13:32:00
4864772	8	Turquoise	0.5	29.01.2020	1.54609	57	8.08576	80.4196	13:33:00
4864768	9	Bronze	0.5	29.01.2020	1.17401	56	6.05536	86.475	13:34:00
4864773	10	Sienna	0.5	29.01.2020	1.36495	38	5.12424	91.5992	13:52:00
4864769	11	Turquoise	0.5	29.01.2020	0.770521	35	2.69611	94.2953	13:55:00
4864765	12	Sienna	0.5	29.01.2020	1.78912	28	5.14985	99.4451	14:02:00
4864528	1	Turquoise	0.5	30.01.2020	0.683295	116	5.85621	5.85621	12:34:00
4864532	2	Sienna	0.5	30.01.2020	0.890557	116	7.63257	13.4888	12:34:00
4864536	3	Sienna	0.5	30.01.2020	1.44081	116	12.3485	25.8373	12:34:00
4864529	4	Turquoise	0.5	30.01.2020	0.886514	88	6.37229	32.2096	13:02:00
4864533	5	Turquoise	0.5	30.01.2020	1.1217	88	8.06285	40.2724	13:02:00
4864537	6	Turquoise	0.5	30.01.2020	1.38591	87	9.88493	50.1574	13:03:00
4864780	7	Turquoise	0.5	30.01.2020	0.576581	61	3.178	53.3354	13:29:00
4864776	8	Turquoise	0.5	30.01.2020	0.84553	60	4.60152	57.9369	13:30:00
4864784	9	Turquoise	0.5	30.01.2020	1.04798	56	5.40528	63.3422	13:34:00
4864777	10	Turquoise	0.5	30.01.2020	0.828054	29	2.45876	65.8009	14:01:00
4864785	11	Sienna	0.5	30.01.2020	1.31556	29	3.90632	69.7072	14:01:00
4864781	12	Turquoise	0.5	30.01.2020	0.875909	26	2.36001	72.0673	14:04:00
4864540	1	Turquoise	4.3	17.02.2020	1.28719	116	2.06965	2.06965	12:34:00
4864544	2	Amber	4.3	17.02.2020	1.43029	116	2.29975	4.3694	12:34:00
4864548	3	Sienna	4.3	17.02.2020	1.978	116	3.1804	7.54981	12:34:00
4864541	4	Bronze	4.3	17.02.2020	0.678558	89	1.08946	8.63927	13:01:00
4864545	5	Yellow	4.3	17.02.2020	1.92792	89	3.09538	11.7347	13:01:00
4864549	6	Turquoise	4.3	17.02.2020	1.03703	89	1.66501	13.3997	13:01:00
4864788	7	Turquoise	4.3	17.02.2020	0.932082	59	1.4772	14.8769	13:31:00
4864792	8	Amber	4.3	17.02.2020	1.04159	59	1.65075	16.5276	13:31:00
4864796	9	Sienna	4.3	17.02.2020	1.84629	59	2.92609	19.4537	13:31:00
4864789	10	Bronze	4.3	17.02.2020	0.895349	37	1.33841	20.7921	13:53:00
4864793	11	Yellow	4.3	17.02.2020	1.30177	35	1.92319	22.7153	13:55:00
4864797	12	Turquoise	4.3	17.02.2020	1.42308	31	2.04056	24.7559	13:59:00
4864552	1	Sienna	4.3	18.02.2020	1.42988	121	2.29926	2.29926	12:29:00
4864556	2	Turquoise	4.3	18.02.2020	0.683069	121	1.09838	3.39764	12:29:00
4864560	3	Turquoise	4.3	18.02.2020	0.73437	121	1.18087	4.57851	12:29:00
4864553	4	Sienna	4.3	18.02.2020	1.21093	88	1.94396	6.52248	13:02:00
4864557	5	Sienna	4.3	18.02.2020	1.99483	83	3.19988	9.72236	13:07:00
4864561	6	Bronze	4.3	18.02.2020	1.59428	83	2.55737	12.2797	13:07:00
4864800	7	Sienna	4.3	18.02.2020	1.51064	59	2.39413	14.6739	13:31:00
4864804	8	Turquoise	4.3	18.02.2020	0.829946	59	1.31533	15.9892	13:31:00
4864808	9	Turquoise	4.3	18.02.2020	0.850561	54	1.33941	17.3286	13:36:00
4864809	10	Bronze	4.3	18.02.2020	1.34136	31	1.92338	19.252	13:59:00
4864801	11	Sienna	4.3	18.02.2020	1.81162	30	2.57422	21.8262	14:00:00
4864805	12	Sienna	4.3	18.02.2020	1.74821	30	2.48411	24.3103	14:00:00
4864568	1	Sienna	4.3	19.02.2020	2.32601	118	3.7401	3.7401	12:32:00
4864572	2	Sienna	4.3	19.02.2020	1.69892	118	2.73177	6.47187	12:32:00
4864564	3	Sienna	4.3	19.02.2020	0.994021	110	1.59807	8.06994	12:40:00
4864573	4	Sienna	4.3	19.02.2020	2.16193	95	3.47317	11.5431	12:55:00
4864569	5	Amber	4.3	19.02.2020	1.66148	89	2.6676	14.2107	13:01:00
4864565	6	Sienna	4.3	19.02.2020	1.74217	75	2.78892	16.9996	13:15:00
4864816	7	Amber	4.3	19.02.2020	1.52597	62	2.42534	19.425	13:28:00
4864820	8	Turquoise	4.3	19.02.2020	1.1803	57	1.86633	21.2913	13:33:00
4864812	9	Sienna	4.3	19.02.2020	1.33473	45	2.06128	23.3526	13:45:00
4864817	10	Sienna	4.3	19.02.2020	1.29892	32	1.87818	25.2308	13:58:00
4864813	11	Sienna	4.3	19.02.2020	1.53046	25	2.05114	27.2819	14:05:00
4864821	12	Turquoise	4.3	19.02.2020	0.952697	25	1.27682	28.5587	14:05:00
4864584	1	Turquoise	4.3	20.02.2020	1.63195	119	2.62413	2.62413	12:31:00
4864576	2	Sienna	4.3	20.02.2020	1.88611	118	3.03277	5.65689	12:32:00
4864585	3	Turquoise	4.3	20.02.2020	1.29752	102	2.08539	7.74228	12:48:00
4864577	4	Bronze	4.3	20.02.2020	2.1195	98	3.40573	11.148	12:52:00
4864580	5	Sienna	4.3	20.02.2020	1.59117	87	2.55404	13.7021	13:03:00
4864832	6	Turquoise	4.3	20.02.2020	1.55146	59	2.45882	16.1609	13:31:00
4864581	7	Sienna	4.3	20.02.2020	1.13214	58	1.7923	17.9532	13:32:00
4864824	8	Sienna	4.3	20.02.2020	2.26169	57	3.57625	21.5294	13:33:00
4864828	9	Sienna	4.3	20.02.2020	1.77438	42	2.71304	24.2425	13:48:00
4864833	10	Turquoise	4.3	20.02.2020	1.33366	35	1.9703	26.2128	13:55:00
4864825	11	Bronze	4.3	20.02.2020	2.06117	29	2.90012	29.1129	14:01:00
4864829	12	Sienna	4.3	20.02.2020	1.70408	22	2.17426	31.2871	14:08:00
4864588	1	Turquoise	0.5	09.03.2020	0.836658	116	7.17063	7.17063	12:34:00
4864592	2	Sienna	0.5	09.03.2020	1.37183	116	11.7573	18.928	12:34:00
4864596	3	Turquoise	0.5	09.03.2020	0.736706	116	6.31398	25.2419	12:34:00
4864589	4	Turquoise	0.5	09.03.2020	1.58146	93	11.7963	37.0383	12:57:00
4864593	5	Turquoise	0.5	09.03.2020	1.68057	93	12.5357	49.5739	12:57:00
4864597	6	Turquoise	0.5	09.03.2020	0.647245	93	4.8279	54.4018	12:57:00
4864840	7	Sienna	0.5	09.03.2020	1.82043	67	10.7724	65.1743	13:23:00
4864844	8	Turquoise	0.5	09.03.2020	0.526377	67	3.11486	68.2891	13:23:00
4864836	9	Turquoise	0.5	09.03.2020	1.16925	62	6.52537	74.8145	13:28:00
4864837	10	Turquoise	0.5	09.03.2020	1.50693	38	5.65727	80.4717	13:52:00
4864841	11	Turquoise	0.5	09.03.2020	1.61324	38	6.05636	86.5281	13:52:00
4864845	12	Turquoise	0.5	09.03.2020	0.691286	38	2.5952	89.1233	13:52:00
4864600	1	Bronze	2.4	10.03.2020	1.0441	116	2.97954	2.97954	12:34:00
4864604	2	Sienna	2.4	10.03.2020	1.15328	116	3.2911	6.27064	12:34:00
4864608	3	Bronze	2.4	10.03.2020	1.79099	116	5.11092	11.3816	12:34:00
4864601	4	Turquoise	2.4	10.03.2020	0.846098	90	2.37143	13.753	13:00:00
4864605	5	Turquoise	2.4	10.03.2020	1.49427	89	4.18331	17.9363	13:01:00
4864609	6	Sienna	2.4	10.03.2020	2.16133	89	6.05077	23.9871	13:01:00
4864848	7	Turquoise	2.4	10.03.2020	0.931056	61	2.44901	26.4361	13:29:00
4864852	8	Sienna	2.4	10.03.2020	1.07643	60	2.82037	29.2564	13:30:00
4864856	9	Bronze	2.4	10.03.2020	1.8153	59	4.73691	33.9934	13:31:00
4864849	10	Bronze	2.4	10.03.2020	1.13283	22	1.9103	35.9037	14:08:00
4864853	11	Bronze	2.4	10.03.2020	1.32089	21	2.163	38.0667	14:09:00
4864857	12	Bronze	2.4	10.03.2020	1.54208	21	2.5252	40.5919	14:09:00
4864612	1	Turquoise	2.4	23.06.2020	1.28761	110	3.6647	3.6647	12:40:00
4864616	2	Turquoise	2.4	23.06.2020	1.02662	110	2.92189	6.58659	12:40:00
4864620	3	Sienna	2.4	23.06.2020	0.958099	110	2.72688	9.31347	12:40:00
4864617	4	Turquoise	2.4	23.06.2020	1.48592	86	4.1444	13.4579	13:04:00
4864621	5	Turquoise	2.4	23.06.2020	1.57942	86	4.40519	17.8631	13:04:00
4864613	6	Sienna	2.4	23.06.2020	0.814698	85	2.26922	20.1323	13:05:00
4864868	7	Sienna	2.4	23.06.2020	1.90569	60	4.99313	25.1254	13:30:00
4864860	8	Turquoise	2.4	23.06.2020	1.28247	59	3.34653	28.4719	13:31:00
4864864	9	Turquoise	2.4	23.06.2020	1.16122	59	3.03014	31.5021	13:31:00
4864861	10	Sienna	2.4	23.06.2020	1.48582	30	2.99186	34.4939	14:00:00
4864865	11	Turquoise	2.4	23.06.2020	1.02456	30	2.06308	36.557	14:00:00
4864869	12	Turquoise	2.4	23.06.2020	1.26295	29	2.49836	39.0554	14:01:00
4864624	1	Bronze	2.4	24.06.2020	1.21582	116	3.46958	3.46958	12:34:00
4864628	2	Sienna	2.4	24.06.2020	0.711449	116	2.03025	5.49983	12:34:00
4864632	3	Sienna	2.4	24.06.2020	0.956952	115	2.72975	8.22958	12:35:00
4864625	4	Bronze	2.4	24.06.2020	1.28616	97	3.62955	11.8591	12:53:00
4864629	5	Sienna	2.4	24.06.2020	0.84682	94	2.38331	14.2424	12:56:00
4864633	6	Turquoise	2.4	24.06.2020	0.946471	84	2.63254	16.875	13:06:00
4864872	7	Bronze	2.4	24.06.2020	1.50976	57	3.90541	20.7804	13:33:00
4864876	8	Sienna	2.4	24.06.2020	0.800932	48	1.96954	22.7499	13:42:00
4864880	9	Turquoise	2.4	24.06.2020	1.37495	48	3.38108	26.131	13:42:00
4864873	10	Bronze	2.4	24.06.2020	1.97375	31	4.04155	30.1725	13:59:00
4864877	11	Sienna	2.4	24.06.2020	1.13706	25	2.07112	32.2437	14:05:00
4864881	12	Sienna	2.4	24.06.2020	1.24031	24	2.20553	34.4492	14:06:00
4988097	1	Turquoise	2.4	25.06.2020	0.552933	120	1.58017	1.58017	12:30:00
4988098	2	Sienna	2.4	25.06.2020	0.464799	120	1.3283	2.90847	12:30:00
4988099	3	Sienna	2.4	25.06.2020	0.905328	112	2.57915	5.48762	12:38:00
4988100	4	Turquoise	2.4	25.06.2020	0.39675	90	1.112	6.59962	13:00:00
4988103	5	Sienna	2.4	25.06.2020	1.30915	90	3.66925	10.2689	13:00:00
4988106	6	Sienna	2.4	25.06.2020	1.55006	76	4.25286	14.5217	13:14:00
4988101	7	Turquoise	2.4	25.06.2020	0.646437	50	1.61062	16.1324	13:40:00
4988104	8	Sienna	2.4	25.06.2020	1.02693	50	2.55864	18.691	13:40:00
4988107	9	Sienna	2.4	25.06.2020	1.03726	41	2.40909	21.1001	13:49:00
4988102	10	Turquoise	2.4	25.06.2020	0.371062	21	0.607627	21.7077	14:09:00
4988105	11	Sienna	2.4	25.06.2020	1.50647	21	2.46689	24.1746	14:09:00
4988108	12	Sienna	2.4	25.06.2020	1.53515	17	2.1825	26.3571	14:13:00
a Airborne nicotine concentration derived from MLE, assuming nicotine would behave as an inert and permanent gas ideally mixed in the room atmosphere
