# Supplementary material for: Comprehensive Air Quality Assessment of the Tobacco Heating System 2.2 under Simulated Indoor Environments
Source: MDPI journal article supplement (doi:10.3390/atmos12080989), 2021-07-31
Supplement: s1 [file s1 › Supplementary Table S16.xlsx]

## Sheet: Guideline values
	Table S16. Exposure limits
	Analytes		OSHA	OEHHA REL	OEHHA REL	OEHHA REL	WHO	EU	Germany	France	EU OEL
			PEL 8 h	acute [1 h]	8 h	chronic
1	UVPM-THBP	[µg/m3]
2	FPM-scopoletin	[µg/m3]
3	Solanesol	[µg/m3]
4	3-Ethenylpyridine	[µg/m3]
5	Nicotine	[µg/m3]									500
6	Acetaldehyde	[µg/m3]	45 000	470	300	140		200	100	160 (annual)
7	Acrolein	[µg/m3]	250	2.5	0.7	0.35	0.1			0.8 (annual)	50
8	Crotonaldehyde	[µg/m3]	300a
9	Formaldehyde	[µg/m3]	920	55	9	9	100 (30 min)	30	100 (30 min)	100 (1-4 h)	250
10	Acrylonitrile	[µg/m3]				5
11	Benzene	[µg/m3]		27	3	3		no safe level	4.5	0.2c	<3250 [8h]
12	1,3-Butadiene	[µg/m3]	2200	660	9	2					<225 [8h]
13	Isoprene	[µg/m3]
14	Toluene	[µg/m3]		5000	830	420	260	300	300		192000
15	Total Volatile Organic Compounds	[µg/m3]							300b
16	Limonene (monocyclic monoterpenes)	[µg/m3]						450	1000
17	α-Pinene (bicyclic monoterpenes)	[µg/m3]						450	200
18	Catechol	[µg/m3]
19	Hydroquinone	[µg/m3]
20	Glycerin	[µg/m3]	5000
21	Propylene glycol	[µg/m3]	500000
22	NNK	[µg/m3]
23	NNN	[µg/m3]
24	PM1	[µg/m3]
25	PM2.5	[µg/m3]	5000				10		25 (24 h)	10
26	UFP	[counts/cm3]
27	CO	[µg/m3]	29000	23000			11500	10000 (8 h)	7000 (24 h)		23000
28	CO2	ppm	5000						1000	10000 (8h)
29	NO	[µg/m3]									2500
30	NO2	[µg/m3]		470	9400		40	40 (annual)	80 (60 min)	20 (1 year)	9400
31	NH3	[µg/m3]	18 000	3200		200		70
32	O3	[µg/m3]	200	180
EU	The INDEX project (Critical Appraisal of the Setting and Implementation of Indoor Exposure Limits in the EU)	Indoor Exposure Limit
EU OEL	European agency for safety and health at work	Indicative occupational exposure limit values
Germany	Federal Environment Agency (Umweltbundesamt), Indoor Guidelines Committee (Ausschuss für Innenraumrichtwerte	Richtwerte I
France	ANSES	Les valeurs guides de qualité d’air intérieur
OEHHA	Office of Environmental Health Hazard Assessment	Reference exposure limit (PEL)
OSHA	Occupational Safety and Health Administration Permissible Exposure Limits (OSHA PELs)	Permissable exposure limit (PEL)
a	Ceiling
b	≤300	μg/m3	hygienically safe (hygienisch unbedenklich)
	300-1000	μg/m3	hygienically safe if no guidelines value is exceeded (hygienisch noch unbedenklich, sofern keine Richtwertueberschreitungen fuer Einzelstoffe bzw. Stoffgruppen vorliegen)
	1000-3000	μg/m3	hygienically conspicious (hygienisch auffällig)
	3000-10000	μg/m3	hygienic cause of concern (hygienisch bedenklich)
	>10000	μg/m3	hygienic unacceptable (hygienisch inakzeptabel)
c	10	μg/m3	1 year, non-cancerogen chronic effect
	2	μg/m3	whole life, risk for cancer 10-5
	0.2	μg/m3	whole life, risk for cancer 10-6
