# Supplementary material for: Comprehensive Air Quality Assessment of the Tobacco Heating System 2.2 under Simulated Indoor Environments
Source: MDPI journal article supplement (doi:10.3390/atmos12080989), 2021-07-31
Supplement: s1 [file s1 › Supplementary Table S17.xlsx]

## Sheet: Sheet1
	Table S17. Airborne constituents measured during the study
	Constituent	FDA1	WHO2	Air quality3	Abundance in THS2.2 mainstream aerosol4	Particulate-phase marker	Gas-phase marker	Human presence- related marker
1	UVPM-THBP					*
2	FPM-scopoletin					*
3	PM-solanesol				*	*
4	3-Ethenylpyridine						*
5	Nicotine	*	*		*		*
6	Acetaldehyde	*	*	*	*		*	*5
7	Acrolein	*	*	*			*
8	Crotonaldehyde	*	*	*			*
9	Formaldehyde	*	*	*			*	*5
10	Acrylonitrile	*	*				*
11	Benzene	*	*	*			*
12	1,3-Butadiene	*	*	*			*
13	Isoprene	*	*				*	*5
14	Toluene	*		*			*
15	TVOC			*			*	*5
16	Catechol	*	*				*
17	Hydroquinone		*				*
18	Glycerin			*	*	*
19	Propylene glycol			*	*		*
20	Nicotine-derived nitrosamine ketone (NNK)	*	*			*	*
21	N-nitrosonornicotine (NNN)	*	*			*	*
22	PM1					*
23	PM2.5			*		*
24	UFP - particles count					*
25	UFP - particles size					*
26	CO2			*				*
27	CO	*	*	*			*
28	NH3	*	*	*			*	*
29	NO		*				*
30	NOx		*	*			*
31	O3			*
	1FDA established list of HPHCs [27]
	2WHO priority list of toxicants [28]
	3For threshold limits in air quality guidelines refer to Supplementary Table S16.
	4Relative abundance in THS2.2 mainstream aerosol
	5Refer to [40]
